# Supplementary material for: Putative Regulatory Factors Associated with Intramuscular Fat Content
Source: PLoS One. 2015 Jun 4;10(6):e0128350. doi: 10.1371/journal.pone.0128350 (PMC4456163; doi:10.1371/journal.pone.0128350)
Supplement: S7 Table — (XLSX) [file pone.0128350.s013.xlsx]

## Sheet: Sheet1
Table S7. Phenotypic impact factor (PIF) scores between high and low IMF groups in Nellore steers.
Ensembl Transcript ID*	Gene Symbol**	PIF value	P.Value	qvalues	FDR(%)	Chr	Start position	End position	Transcript length (bp)	Unannotated and novel gene description/UniProt access number
ENSBTAT00000012179	ATAD2B	23.8577	6.35383e-34	2.92595e-32	7.21632e-31	11	75162791	75257673	3747
ENSBTAT00000042306	bta-mir-10b	23.8585	6.34397e-34	2.92595e-32	7.21632e-31	2	20797606	20797704	99
ENSBTAT00000042367	bta-mir-331	23.8585	6.34397e-34	2.92595e-32	7.21632e-31	5	25109057	25109150	94
ENSBTAT00000051839	bta-mir-208b	23.8585	6.34397e-34	2.92595e-32	7.21632e-31	10	21340623	21340702	80
ENSBTAT00000053253	bta-mir-1281	23.8585	6.34397e-34	2.92595e-32	7.21632e-31	5	112802157	112802210	54
ENSBTAT00000059375	SNORD37	23.8585	6.34397e-34	2.92595e-32	7.21632e-31	7	21255395	21255459	65
ENSBTAT00000059496	SNORD78	23.8585	6.34397e-34	2.92595e-32	7.21632e-31	16	56692803	56692867	65
ENSBTAT00000060260	SNORD79	23.8585	6.34397e-34	2.92595e-32	7.21632e-31	16	56692481	56692561	81
ENSBTAT00000060392	U6	23.8585	6.34397e-34	2.92595e-32	7.21632e-31	24	62166071	62166177	107
ENSBTAT00000062113	bta-mir-2428	23.8585	6.34397e-34	2.92595e-32	7.21632e-31	5	41964062	41964126	65
ENSBTAT00000062572	5S_rRNA	23.8585	6.34397e-34	2.92595e-32	7.21632e-31	2	35078308	35078424	117
ENSBTAT00000063538	EME2	23.8548	6.41301e-34	2.92595e-32	7.21632e-31	25	1351233	1354061	1148
ENSBTAT00000065462	SUMO2	23.8562	6.37504e-34	2.92595e-32	7.21632e-31	19	56923424	56931160	372
ENSBTAT00000065616	ENSBTAT00000065616	23.8585	6.34397e-34	2.92595e-32	7.21632e-31	17	74022980	74024014	171	Uncharacterized protein [Source:UniProtKB/TrEMBL;Acc:G3MYM7]
ENSBTAT00000066166	SEPW1	23.8393	6.72286e-34	2.92595e-32	7.21632e-31	18	55112228	55116590	956
ENSBTAT00000038678	COL3A1	23.8378	7.8912e-34	3.22067e-32	7.94101e-31	2	7319821	7344001	3457
ENSBTAT00000065108	biotype:miRNA	23.8519	9.33056e-34	3.58444e-32	8.83714e-31	19	51870131	51870214	84
ENSBTAT00000019804	FYTTD1	23.8208	1.00882e-33	3.6647e-32	9.02389e-31	1	70954511	70984201	1199
ENSBTAT00000064392	CAND2	23.8008	1.28093e-33	4.39993e-32	1.08549e-30	22	56990323	57017221	3880
ENSBTAT00000063660	SDC4	23.8055	4.59665e-33	1.50216e-31	3.70053e-30	13	74393120	74402276	843
ENSBTAT00000054280	RUFY2	23.5908	4.07396e-25	1.2658e-23	3.12357e-22	28	24917632	24955300	1657
ENSBTAT00000020719	RPS10	17.975	1.48877e-23	4.42336e-22	1.08958e-20	23	8434576	8441522	576
ENSBTAT00000002666	RPL19	20.4245	3.85194e-23	1.09326e-21	2.69652e-20	19	40332947	40334703	563
ENSBTAT00000008142	DRAP1	11.7766	4.4137e-23	1.2001e-21	2.96104e-20	29	44694171	44696295	832
ENSBTAT00000021268	RPS5	17.3207	5.18275e-23	1.35325e-21	3.3379e-20	18	65845925	65851516	714
ENSBTAT00000029899	VDAC5P	14.0591	6.35861e-23	1.59762e-21	3.93769e-20	27	36921292	36933273	1369
ENSBTAT00000026259	RPL31	21.2505	7.07684e-23	1.71261e-21	4.22015e-20	11	6003175	6008528	435
ENSBTAT00000028159	MYOZ1	29.7234	7.5712e-23	1.76574e-21	4.35371e-20	28	29780787	29798613	1358
ENSBTAT00000021033	RPL18A	16.0885	8.68161e-23	1.95484e-21	4.82009e-20	7	5206112	5209504	624
ENSBTAT00000063744	EIF1	23.7445	1.66059e-22	3.6139e-21	8.9124e-20	3	60346812	60347472	661
ENSBTAT00000006532	ACTA1	51.3109	1.72051e-22	3.62373e-21	8.93612e-20	28	419154	421910	1485
ENSBTAT00000005007	RPL13A	22.545	3.41496e-22	6.95975e-21	1.71826e-19	18	56394558	56398082	662
ENSBTAT00000005143	ENSBTAT00000005143	17.4908	4.02279e-22	7.95612e-21	1.96276e-19	13	22813811	22814335	525	4S ribosomal protein S13 [Source:UniProtKB/TrEMBL;Acc:E1BGR6]
ENSBTAT00000020452	RPL18	18.6061	6.62992e-22	1.27357e-20	3.13966e-19	18	55710193	55713956	630
ENSBTAT00000035337	ATP5E	19.2274	1.01772e-21	1.90336e-20	4.6818e-19	22	35335190	35335581	392
ENSBTAT00000020326	RPS8	20.3566	1.11096e-21	1.95934e-20	4.824e-19	3	101816844	101818956	679
ENSBTAT00000028899	EEF1A2	27.5468	1.13851e-21	1.95934e-20	4.824e-19	13	54623917	54631595	1772
ENSBTAT00000065572	ENSBTAT00000065572	15.7248	1.09824e-21	1.95934e-20	4.824e-19	24	13077339	13078261	923
ENSBTAT00000032006	ENSBTAT00000032006	16.456	1.17984e-21	1.97609e-20	4.87091e-19	5	28525103	28525496	394
ENSBTAT00000028712	PHPT1	13.557	1.52887e-21	2.49816e-20	6.15407e-19	11	106334245	106335688	600
ENSBTAT00000002326	RPLP2	17.6803	1.58235e-21	2.51688e-20	6.214e-19	29	50768654	50770791	457
ENSBTAT00000014888	EIF3K	10.9954	1.73389e-21	2.69021e-20	6.64699e-19	18	48648907	48661802	770
ENSBTAT00000024376	RPLP1	26.3286	1.79904e-21	2.73397e-20	6.73637e-19	10	16324341	16326492	516
ENSBTAT00000003201	RPS28	20.1293	1.9306e-21	2.83963e-20	6.99123e-19	7	18198992	18200124	332
ENSBTAT00000026400	ENSBTAT00000026400	18.5907	1.99737e-21	2.83963e-20	6.99123e-19	5	107749635	107750145	511	Uncharacterized protein [Source:UniProtKB/TrEMBL;Acc:G3MWX5]
ENSBTAT00000052289	RPLP1	26.1312	1.99732e-21	2.83963e-20	6.99123e-19	16	52249583	52372101	514
ENSBTAT00000028269	MYLPF	46.5429	2.82941e-21	3.93258e-20	9.69283e-19	25	26815266	26817727	644
ENSBTAT00000034656	HSBP1	10.8956	3.09854e-21	4.21803e-20	1.03937e-18	18	10172302	10175455	562
ENSBTAT00000027850	RPL11	17.7633	3.29878e-21	4.39852e-20	1.08395e-18	2	129791372	129795563	603
ENSBTAT00000007278	ENO3	33.2769	3.39244e-21	4.42811e-20	1.09243e-18	19	27073498	27078655	1439
ENSBTAT00000003431	RPS18	20.1345	3.48899e-21	4.46935e-20	1.1015e-18	23	7388703	7393361	539
ENSBTAT00000008373	ENSBTAT00000008373	17.8437	3.56828e-21	4.48388e-20	1.10486e-18	X	126048949	126049743	795	4S ribosomal protein S3a [Source:UniProtKB/TrEMBL;Acc:G3N262]
ENSBTAT00000008502	RPS9	17.4764	4.09662e-21	4.97092e-20	1.22521e-18	18	63381416	63388728	705
ENSBTAT00000021587	RPS7	20.4428	4.10916e-21	4.97092e-20	1.22521e-18	8	112896493	112901718	741
ENSBTAT00000000802	ENSBTAT00000000802	18.0829	4.21869e-21	5.00332e-20	1.23277e-18	1	54654216	54654795	580
ENSBTAT00000065038	TNNC2	48.8253	4.28763e-21	5.00332e-20	1.23277e-18	13	75316423	75318650	392
ENSBTAT00000022832	MACROD1	19.9938	4.66338e-21	5.33949e-20	1.31728e-18	29	42890800	43092842	1254
ENSBTAT00000065799	TPT1	35.4527	4.89809e-21	5.51769e-20	1.35973e-18	25	1394201	1417716	775
ENSBTAT00000023094	YBX1	18.5953	5.29495e-21	5.85589e-20	1.44498e-18	3	104112934	104133708	1526
ENSBTAT00000000814	RPS17	22.7747	5.64266e-21	6.13499e-20	1.5115e-18	21	23301663	23305104	486
ENSBTAT00000021170	TMEM147	9.42166	5.72646e-21	6.13499e-20	1.5115e-18	18	46394495	46396382	857
ENSBTAT00000065893	MRFAP1	12.6878	5.96405e-21	6.27832e-20	1.54882e-18	6	117990818	117992917	1599
ENSBTAT00000003962	RPS3	18.8842	7.6951e-21	7.86706e-20	1.93835e-18	15	55370367	55375306	829
ENSBTAT00000020323	RPL32	18.1179	7.92857e-21	7.86706e-20	1.93835e-18	22	56985249	56989012	504
ENSBTAT00000023183	RPL27	16.9839	7.94555e-21	7.86706e-20	1.93835e-18	19	43669374	43671655	464
ENSBTAT00000046331	TMOD4	22.6102	7.87879e-21	7.86706e-20	1.93835e-18	3	19679350	19683836	1196
ENSBTAT00000002828	COX17	17.0222	8.33736e-21	8.12981e-20	2.00358e-18	1	65024153	65031968	384
ENSBTAT00000009155	RPL12	16.5959	9.41986e-21	8.91643e-20	2.1981e-18	10	83480588	83481217	630
ENSBTAT00000024788	RPL29	18.266	9.2904e-21	8.91643e-20	2.1981e-18	22	49499798	49501972	615
ENSBTAT00000012866	RPSA	16.0985	9.57546e-21	8.93833e-20	2.20249e-18	22	12729703	12741653	997
ENSBTAT00000019814	GABARAP	13.9245	1.13312e-20	1.03946e-19	2.56964e-18	19	27586886	27588815	820
ENSBTAT00000018491	RPS11	22.3396	1.14974e-20	1.04317e-19	2.57111e-18	18	56404237	56406668	578
ENSBTAT00000063708	ENSBTAT00000063708	17.4733	1.37611e-20	1.23465e-19	3.03517e-18	21	55966632	55968362	496	Bos taurus small EDRKrich factor 2 (SERF2), mRNA. [Source:RefSeq mRNA;Acc:NM_126348]
ENSBTAT00000023246	GNAS	12.6952	1.42407e-20	1.25327e-19	3.09851e-18	13	58010287	58049012	2277
ENSBTAT00000001791	RPS12	19.9164	1.46504e-20	1.2801e-19	3.14515e-18	9	71974860	71978200	463
ENSBTAT00000002642	RPL14	17.7108	1.69602e-20	1.44194e-19	3.54644e-18	22	13336573	13339983	716
ENSBTAT00000059697	U6	23.7979	1.68435e-20	1.44194e-19	3.54644e-18	22	7776523	7776626	104
ENSBTAT00000005015	RPL37A	17.2545	1.75658e-20	1.47369e-19	3.62599e-18	2	105202277	105204896	659
ENSBTAT00000007538	ATP5G2	16.2037	1.7969e-20	1.48583e-19	3.66216e-18	5	26535464	26539249	597
ENSBTAT00000042787	EDF1	11.453	1.81959e-20	1.48583e-19	3.66216e-18	11	106320380	106324288	905
ENSBTAT00000026183	GNB2L1	19.1773	1.86049e-20	1.49738e-19	3.68327e-18	7	41761805	41766598	1103
ENSBTAT00000037367	RPL8	13.5237	1.87584e-20	1.49738e-19	3.68327e-18	14	1505030	1507633	850
ENSBTAT00000017905	RPL24	18.8954	1.91847e-20	1.51082e-19	3.7216e-18	1	46415223	46420721	547
ENSBTAT00000002015	ENSBTAT00000002015	14.2316	2.15052e-20	1.63279e-19	4.02622e-18	3	117506247	117506811	565	Uncharacterized protein [Source:UniProtKB/TrEMBL;Acc:E1BAT6]
ENSBTAT00000004501	TCEA3	12.6797	2.10328e-20	1.63279e-19	4.02622e-18	2	130023501	130069587	1233
ENSBTAT00000026278	RPS15	17.746	2.12807e-20	1.63279e-19	4.02622e-18	7	45465834	45467519	489
ENSBTAT00000006376	KPNA3	9.75936	2.20681e-20	1.65906e-19	4.08411e-18	12	19339291	19385309	1499
ENSBTAT00000007014	MB	40.3238	2.59124e-20	1.90064e-19	4.6933e-18	5	74170471	74181260	1082
ENSBTAT00000028048	PSMC5	11.2577	2.59427e-20	1.90064e-19	4.6933e-18	19	48728282	48732869	1313
ENSBTAT00000018626	POMP	8.33759	2.63135e-20	1.90854e-19	4.70748e-18	12	31492830	31503972	1251
ENSBTAT00000014452	TNNI2	39.243	2.67902e-20	1.92346e-19	4.74009e-18	29	50285049	50287648	720
ENSBTAT00000004190	RPL23	19.8066	2.85807e-20	2.03033e-19	5.00193e-18	19	40075000	40079360	493
ENSBTAT00000008022	NHP2L1	7.65516	3.24209e-20	2.27537e-19	5.613e-18	5	113255672	113264464	1413
ENSBTAT00000043971	POLR2L	10.6898	3.30594e-20	2.2998e-19	5.66266e-18	29	50689638	50694424	375
ENSBTAT00000009712	ENY2	7.62966	3.34741e-20	2.30309e-19	5.67333e-18	14	57239787	57249241	634
ENSBTAT00000025270	RPS25	21.2538	3.59864e-20	2.42393e-19	5.97336e-18	3	16507484	16507861	378
ENSBTAT00000043425	PGM1	21.5123	3.59661e-20	2.42393e-19	5.97336e-18	3	82250292	82315999	2363
ENSBTAT00000002948	EIF1	19.7457	3.73595e-20	2.48711e-19	6.12379e-18	19	42545777	42548334	1279
ENSBTAT00000055329	PAFAH1B1	7.38066	3.76532e-20	2.48711e-19	6.12379e-18	19	24088805	24158415	1427
ENSBTAT00000033359	RPL6	10.4262	3.82418e-20	2.4949e-19	6.15732e-18	17	64115683	64120590	946
ENSBTAT00000014486	PPP1R1A	27.2494	3.94767e-20	2.55426e-19	6.29322e-18	5	25627052	25631242	566
ENSBTAT00000001208	UQCR10	17.4128	4.05927e-20	2.58075e-19	6.36591e-18	17	71038498	71040693	462
ENSBTAT00000052276	ENSBTAT00000052276	14.877	4.07235e-20	2.58075e-19	6.36591e-18	X	39983832	39984337	506	Uncharacterized protein [Source:UniProtKB/TrEMBL;Acc:G5E6D6]
ENSBTAT00000019085	SRP14	7.36202	4.17112e-20	2.61874e-19	6.45762e-18	10	35805063	35808329	858
ENSBTAT00000011762	PFDN5	8.33277	4.27709e-20	2.66222e-19	6.55861e-18	5	26886091	26890186	933
ENSBTAT00000020266	RPL10	14.8805	4.58592e-20	2.80168e-19	6.90073e-18	1	54649606	54650250	645
ENSBTAT00000060985	MSRB3	11.8375	4.55032e-20	2.80168e-19	6.90073e-18	5	48563806	48743354	660
ENSBTAT00000017590	GORASP2	4.77382	4.66762e-20	2.82411e-19	6.95864e-18	2	25566351	25599241	2245
ENSBTAT00000046179	TPM2	30.6338	4.77264e-20	2.85812e-19	7.04993e-18	8	60267452	60274815	2116
ENSBTAT00000003545	EIF3G	9.44145	5.02161e-20	2.95372e-19	7.28406e-18	7	15897380	15902004	1119
ENSBTAT00000007442	YWHAE	14.9268	4.99841e-20	2.95372e-19	7.28406e-18	19	23086308	23121103	1753
ENSBTAT00000013301	ENSBTAT00000013301	19.0006	5.45837e-20	3.18393e-19	7.8469e-18	21	14304505	14304970	466	Uncharacterized protein [Source:UniProtKB/TrEMBL;Acc:E1BFM3]
ENSBTAT00000003609	COPS5	8.31156	5.85389e-20	3.38117e-19	8.34102e-18	14	33207508	33226917	1314
ENSBTAT00000043649	MYBPC1	25.8387	5.98058e-20	3.42598e-19	8.44679e-18	5	65737956	65840833	4385
ENSBTAT00000008607	GABARAPL2	9.00326	6.23822e-20	3.5133e-19	8.65875e-18	18	2907580	2917649	943
ENSBTAT00000020559	NSUN2	3.83943	6.23285e-20	3.5133e-19	8.65875e-18	20	66719397	66752908	2958
ENSBTAT00000017023	ENSBTAT00000017023	9.66251	6.33813e-20	3.52571e-19	8.69691e-18	2	43381652	43382632	900	Uncharacterized protein [Source:UniProtKB/TrEMBL;Acc:E1BFB6]
ENSBTAT00000054202	QKI	10.4357	6.37374e-20	3.52571e-19	8.69691e-18	9	100370037	100480357	1491
ENSBTAT00000001373	PYGM	27.5771	6.50228e-20	3.55165e-19	8.7582e-18	29	43606012	43617848	2886
ENSBTAT00000018645	EIF3H	10.2454	6.52745e-20	3.55165e-19	8.7582e-18	14	49733172	49830429	1216
ENSBTAT00000061284	PDE4DIP	17.3674	6.58452e-20	3.55165e-19	8.76177e-18	3	22916551	23063522	8033
ENSBTAT00000047320	RPL13	14.5254	6.66524e-20	3.57071e-19	8.79648e-18	18	14533161	14535556	932
ENSBTAT00000005943	ENSBTAT00000005943	25.0594	6.94366e-20	3.64176e-19	8.97347e-18	18	2084512	2126855	842	Uncharacterized protein [Source:UniProtKB/TrEMBL;Acc:E1BBP8]
ENSBTAT00000017430	VDAC1	15.3336	6.96654e-20	3.64176e-19	8.97347e-18	7	47247744	47273458	1782
ENSBTAT00000024159	NRBP1	6.83429	6.90166e-20	3.64176e-19	8.97347e-18	11	72224816	72237348	2140
ENSBTAT00000016768	NDUFB7	13.665	7.07457e-20	3.64315e-19	8.9859e-18	7	12325362	12329750	496
ENSBTAT00000016954	CCT7	7.78993	7.14362e-20	3.64315e-19	8.9859e-18	11	11184520	11196236	1748
ENSBTAT00000031754	RPL28	17.5975	7.1404e-20	3.64315e-19	8.9859e-18	18	62547220	62549950	506
ENSBTAT00000021868	YME1L1	7.47208	7.23114e-20	3.66048e-19	9.02547e-18	13	17986323	18015111	2540
ENSBTAT00000015186	TPM2	41.732	7.41281e-20	3.72275e-19	9.18105e-18	8	60268618	60274720	855
ENSBTAT00000014799	KPNA1	7.66903	7.58439e-20	3.77909e-19	9.32185e-18	1	67476527	67545097	2657
ENSBTAT00000036839	BTF3	13.4959	7.88341e-20	3.89889e-19	9.61597e-18	20	8038617	8045160	859
ENSBTAT00000021075	SDHC	10.0036	7.94999e-20	3.90395e-19	9.62427e-18	3	8195438	8226068	1296
ENSBTAT00000055086	RPLP0	20.1247	8.02144e-20	3.90894e-19	9.6383e-18	17	64809254	64813289	1096
ENSBTAT00000004114	HNRNPUL1	6.17903	8.5913e-20	4.15574e-19	1.02466e-17	18	50718845	50752307	3637
ENSBTAT00000034867	MRPL45	6.29004	9.134e-20	4.38451e-19	1.08137e-17	19	39603001	39622275	1335
ENSBTAT00000022970	VAPA	12.5777	9.86449e-20	4.70052e-19	1.15933e-17	24	42332694	42368659	1546
ENSBTAT00000020011	IK	6.55939	1.03707e-19	4.92202e-19	1.20999e-17	7	53464181	53476406	1875
ENSBTAT00000019791	ENSBTAT00000019791	11	1.1704e-19	5.49744e-19	1.35573e-17	16	11057883	11058607	725	Uncharacterized protein [Source:UniProtKB/TrEMBL;Acc:E1BMK2]
ENSBTAT00000000901	CSDE1	17.5698	1.18115e-19	5.50482e-19	1.35841e-17	3	28695271	28723718	3854
ENSBTAT00000022919	UBB	20.897	1.23981e-19	5.70325e-19	1.40578e-17	19	33853788	33855685	1144
ENSBTAT00000065403	LDB3	19.1894	1.23783e-19	5.70325e-19	1.40578e-17	28	41657195	41713873	2276
ENSBTAT00000014490	MYEOV2	12.4648	1.28048e-19	5.84606e-19	1.44174e-17	3	120123114	120127712	467
ENSBTAT00000023455	EIF1AX	9.09728	1.30217e-19	5.89617e-19	1.45598e-17	X	130307269	130317159	754
ENSBTAT00000011458	UQCR11	18.9976	1.3327e-19	5.90913e-19	1.45971e-17	7	45592773	45595693	358
ENSBTAT00000012301	AMZ2	9.88465	1.32777e-19	5.90913e-19	1.45971e-17	19	62506950	62514776	1151
ENSBTAT00000035701	RNF5	6.3363	1.31492e-19	5.90055e-19	1.45971e-17	23	27012067	27014380	1045
ENSBTAT00000014053	DCTN2	9.45327	1.43526e-19	6.35462e-19	1.56143e-17	5	56262302	56275883	1690
ENSBTAT00000028093	RPS16	12.02	1.45887e-19	6.39964e-19	1.57646e-17	18	49393725	49396191	562
ENSBTAT00000042874	RPS14	18.4843	1.48623e-19	6.4876e-19	1.59532e-17	7	63761742	63779251	492
ENSBTAT00000000730	ENSBTAT00000000730	14.0861	1.54871e-19	6.70415e-19	1.65138e-17	19	13525432	13526742	1311	Uncharacterized protein [Source:UniProtKB/TrEMBL;Acc:G3MXR5]
ENSBTAT00000011280	ENSBTAT00000011280	8.33969	1.60422e-19	6.87489e-19	1.69932e-17	15	57120901	57122291	1391
ENSBTAT00000021796	ENSBTAT00000021796	17.6541	1.62931e-19	6.95801e-19	1.71461e-17	9	16325798	16326091	294	Ribosomal protein L37 [Source:UniProtKB/TrEMBL;Acc:E1BFX3]
ENSBTAT00000061564	RANBP6	9.44861	1.66174e-19	7.04006e-19	1.73738e-17	12	79000723	79039990	3334
ENSBTAT00000062950	TNNC1	35.6351	1.70614e-19	7.20532e-19	1.77229e-17	22	48988984	48991875	689
ENSBTAT00000015358	RPL7A	14.4635	1.75682e-19	7.34753e-19	1.81324e-17	11	104311808	104315125	881
ENSBTAT00000007832	EIF2S2	10.0417	1.78423e-19	7.34753e-19	1.81627e-17	13	64050711	64069300	1420
ENSBTAT00000021559	CLINT1	4.95213	1.79359e-19	7.34753e-19	1.81627e-17	7	71421947	71479026	3270
ENSBTAT00000022761	PABPC4	9.58549	1.78917e-19	7.34753e-19	1.81627e-17	3	107084063	107097489	2405
ENSBTAT00000015695	C7H19orf43	6.38033	1.80495e-19	7.34753e-19	1.81634e-17	7	13896310	13899366	878
ENSBTAT00000025126	RPL27A	12.1898	1.87145e-19	7.58586e-19	1.87157e-17	15	44469327	44472127	515
ENSBTAT00000021651	RPL30	15.2302	1.89442e-19	7.61967e-19	1.88284e-17	14	68467563	68470952	534
ENSBTAT00000012735	CSDA	26.378	1.95376e-19	7.71862e-19	1.90652e-17	5	99335508	99360895	1739
ENSBTAT00000013451	RAB7A	8.05717	1.95373e-19	7.71862e-19	1.90652e-17	22	59862214	59877343	1259
ENSBTAT00000053293	COX7B	16.3629	1.93347e-19	7.71862e-19	1.90652e-17	17	60146304	60146762	459
ENSBTAT00000016514	PPP1CB	11.9253	2.01171e-19	7.8451e-19	1.93695e-17	11	70961032	70997556	2786
ENSBTAT00000019970	VCP	12.2235	2.03307e-19	7.8451e-19	1.93695e-17	8	59732258	59746989	3242
ENSBTAT00000027930	IQWD1	9.80714	2.03206e-19	7.8451e-19	1.93695e-17	3	587034	768209	3277
ENSBTAT00000064533	ENSBTAT00000064533	12.8802	2.00308e-19	7.8451e-19	1.93695e-17	7	21247239	21247649	411	Histone H3 [Source:UniProtKB/TrEMBL;Acc:G3MYD7]
ENSBTAT00000015480	PRPF6	4.17711	2.19432e-19	8.36444e-19	2.06612e-17	13	54308647	54343470	2994
ENSBTAT00000015719	ASNA1	7.52827	2.19022e-19	8.36444e-19	2.06612e-17	7	13886318	13894406	1268
ENSBTAT00000000721	ATP5D	16.4087	2.32716e-19	8.84742e-19	2.17846e-17	7	45302252	45304424	973
ENSBTAT00000017277	RNF11	9.46828	2.4685e-19	9.32481e-19	2.29742e-17	3	95599737	95601983	798
ENSBTAT00000009673	ENSBTAT00000009673	10.0953	2.51957e-19	9.35141e-19	2.30497e-17	19	50009722	50010311	590
ENSBTAT00000046599	GHITM	9.48796	2.51096e-19	9.35141e-19	2.30497e-17	28	39435546	39448963	2323
ENSBTAT00000059637	SNORD46	23.5399	2.51815e-19	9.35141e-19	2.30497e-17	3	101818498	101818601	104
ENSBTAT00000043235	UBE2B	14.4676	2.54443e-19	9.37237e-19	2.31457e-17	7	47528581	47541198	673
ENSBTAT00000009228	RYR1	16.42	2.58933e-19	9.50318e-19	2.34218e-17	18	48502352	48631056	15265
ENSBTAT00000042757	ENSBTAT00000042757	12.869	2.6168e-19	9.55955e-19	2.3538e-17	11	104186563	104187141	579
ENSBTAT00000037753	G3PDH	36.2934	2.67556e-19	9.72414e-19	2.39328e-17	5	104237902	104241979	1056
ENSBTAT00000054758	PTP4A2	16.5994	2.71064e-19	9.77867e-19	2.41127e-17	2	122350144	122359897	1382
ENSBTAT00000039245	ROMO1	11.4535	2.75717e-19	9.90437e-19	2.43919e-17	13	65563083	65564614	402
ENSBTAT00000024656	OAZ1	17.1144	2.78219e-19	9.92163e-19	2.44787e-17	7	22577243	22580777	1183
ENSBTAT00000010949	SDHB	17.5886	2.85625e-19	1.01321e-18	2.49938e-17	2	136125304	136154362	968
ENSBTAT00000065774	PSMC2	9.68248	2.8736e-19	1.01321e-18	2.50096e-17	4	44806721	44819866	1440
ENSBTAT00000013405	TOMM22	7.59895	3.02604e-19	1.06394e-18	2.61948e-17	5	110825640	110827610	1080
ENSBTAT00000029239	RNASEK	8.72774	3.06825e-19	1.07222e-18	2.64181e-17	19	27436503	27438226	652
ENSBTAT00000043278	UQCRQ	16.3023	3.20163e-19	1.1058e-18	2.72748e-17	7	46069106	46070318	422
ENSBTAT00000054038	AK1	20.8541	3.19584e-19	1.1058e-18	2.72748e-17	11	98552024	98561576	829
ENSBTAT00000010389	FIS1	11.7723	3.27359e-19	1.12404e-18	2.77411e-17	25	36034989	36038644	726
ENSBTAT00000008609	HDGF	9.22629	3.40638e-19	1.16603e-18	2.87153e-17	3	14130196	14138913	1002
ENSBTAT00000026631	ENSBTAT00000026631	11.9166	3.58599e-19	1.22119e-18	3.00719e-17	2	91685397	91686142	746
ENSBTAT00000018234	MRPS25	7.37219	3.62423e-19	1.22501e-18	3.02351e-17	22	57865203	57909687	699
ENSBTAT00000024641	FHL1	32.6949	3.69194e-19	1.24226e-18	3.06412e-17	X	19809635	19820952	1915
ENSBTAT00000009128	COPS4	9.37842	3.77801e-19	1.26604e-18	3.11947e-17	6	99610792	99649394	1588
ENSBTAT00000021838	CTNNB1	7.55807	3.83602e-19	1.27957e-18	3.15121e-17	22	13842703	13889468	3317
ENSBTAT00000010675	POLDIP2	10.3257	3.8684e-19	1.28302e-18	3.16168e-17	19	20391106	20398885	1466
ENSBTAT00000019184	ENSBTAT00000019184	12.823	4.0346e-19	1.32932e-18	3.28087e-17	16	47992813	48000514	967	Uncharacterized protein [Source:UniProtKB/TrEMBL;Acc:F1N31]
ENSBTAT00000028954	MRPL27	8.43572	4.28216e-19	1.40469e-18	3.46468e-17	19	36934823	36939652	663
ENSBTAT00000003662	TCP1	7.94555	4.61375e-19	1.50543e-18	3.7143e-17	9	97481824	97492748	1847
ENSBTAT00000000831	LSM14A	5.44921	4.77207e-19	1.54993e-18	3.82264e-17	18	44800804	44854327	2218
ENSBTAT00000063143	ENSBTAT00000063143	16.8037	4.86256e-19	1.57135e-18	3.87584e-17	11	47050711	47051142	432	Uncharacterized protein [Source:UniProtKB/TrEMBL;Acc:E1BEQ3]
ENSBTAT00000007982	SUCLG1	13.9294	4.93117e-19	1.58613e-18	3.91117e-17	11	50400445	50453412	1263
ENSBTAT00000008593	ATP2A1	28.2662	4.96994e-19	1.59117e-18	3.9226e-17	25	26188434	26204655	3152
ENSBTAT00000028282	ATP5H	16.8128	5.05779e-19	1.61208e-18	3.97246e-17	19	57020084	57024849	612
ENSBTAT00000001071	COPE	7.3418	5.14135e-19	1.61247e-18	3.97739e-17	7	4224033	4242168	1104
ENSBTAT00000007761	NDUFB6	11.9582	5.16287e-19	1.61247e-18	3.97739e-17	8	11372938	11389199	576
ENSBTAT00000012670	ENSBTAT00000012670	9.3088	5.15744e-19	1.61247e-18	3.97739e-17	16	41507401	41508463	1063
ENSBTAT00000065039	ENSBTAT00000065039	17.8706	5.12952e-19	1.61247e-18	3.97739e-17	13	64372559	64372993	435	6S ribosomal protein L26 [Source:UniProtKB/TrEMBL;Acc:G3MYC1]
ENSBTAT00000023213	ATF4	25.274	5.24616e-19	1.63279e-18	4.02231e-17	5	111462845	111464936	1411
ENSBTAT00000018840	STRAP	6.81248	5.38937e-19	1.66838e-18	4.11252e-17	5	94445846	94467434	2999
ENSBTAT00000024367	ENSBTAT00000024367	9.05473	5.51671e-19	1.69993e-18	4.18984e-17	1	104146631	104147374	744	Profilin [Source:UniProtKB/TrEMBL;Acc:E1BHJ]
ENSBTAT00000007177	USP7	5.93688	5.5665e-19	1.69993e-18	4.19183e-17	25	7769457	7796941	3294
ENSBTAT00000015136	STOML2	7.60189	5.5714e-19	1.69993e-18	4.19183e-17	8	59768559	59771818	1311
ENSBTAT00000016918	PSMB5	8.6603	5.635e-19	1.71329e-18	4.21996e-17	10	21658161	21663680	1367
ENSBTAT00000013989	AP2S1	7.8214	5.67359e-19	1.71442e-18	4.22919e-17	18	54363679	54373314	765
ENSBTAT00000054559	ENSBTAT00000054559	8.87341	5.79513e-19	1.74565e-18	4.29988e-17	9	30223948	30224832	786
ENSBTAT00000019336	PGAM2	25.1768	5.87785e-19	1.76161e-18	4.34125e-17	22	370972	373326	850
ENSBTAT00000039955	IPO7	7.8855	5.94128e-19	1.77146e-18	4.36806e-17	15	43781463	43825036	3782
ENSBTAT00000034155	SNRPC	6.67275	5.98349e-19	1.77528e-18	4.3791e-17	23	8726525	8737237	753
ENSBTAT00000022266	CAPRIN1	6.51865	6.11641e-19	1.80862e-18	4.45612e-17	15	65457710	65497385	3316
ENSBTAT00000045615	ENSBTAT00000045615	15.9697	6.17335e-19	1.81519e-18	4.47735e-17	5	35704691	35705161	471
ENSBTAT00000044459	LRRC2	9.55763	6.20292e-19	1.81583e-18	4.47862e-17	22	53448776	53486047	1567
ENSBTAT00000011817	TOMM6	6.93816	6.24145e-19	1.81939e-18	4.48632e-17	23	15609349	15610694	604
ENSBTAT00000013231	CHCHD9	12.0669	6.28374e-19	1.82291e-18	4.49665e-17	25	28016899	28022616	820
ENSBTAT00000029923	RBBP7	5.94892	6.39631e-19	1.84953e-18	4.55694e-17	X	133866652	133939151	1909
ENSBTAT00000004751	PRDX1	10.247	6.48305e-19	1.86039e-18	4.58601e-17	3	101152892	101166725	889
ENSBTAT00000008727	PRKACA	7.92142	6.52533e-19	1.86039e-18	4.58601e-17	7	12693768	12711139	1119
ENSBTAT00000012170	RAC1	10.8199	6.58395e-19	1.86039e-18	4.58601e-17	25	38832485	38841319	898
ENSBTAT00000019736	OXA1L	6.81394	6.55689e-19	1.86039e-18	4.58601e-17	10	21864275	21879576	1817
ENSBTAT00000025322	NDUFA11	11.8785	6.53253e-19	1.86039e-18	4.58601e-17	7	19698987	19704035	557
ENSBTAT00000028162	HNRNPK	7.70844	6.608e-19	1.86081e-18	4.58601e-17	8	78574698	78585938	2128
ENSBTAT00000010815	PAIP2	9.56163	7.0715e-19	1.98177e-18	4.88662e-17	7	52252774	52270426	1424
ENSBTAT00000025896	CTDNEP1	8.12052	7.23481e-19	2.01796e-18	4.9781e-17	19	27589896	27596032	1656
ENSBTAT00000006490	KLHDC2	6.79985	7.40476e-19	2.05661e-18	5.07337e-17	10	42792727	42808107	1695
ENSBTAT00000013078	NDUFS6	11.0805	7.61298e-19	2.08942e-18	5.14981e-17	20	70986115	70991390	746
ENSBTAT00000018910	RPL34	16.4791	7.70118e-19	2.08942e-18	5.14981e-17	6	17828130	17832711	407
ENSBTAT00000025800	POLR2B	4.8819	7.57383e-19	2.08942e-18	5.14981e-17	6	74027219	74071144	3798
ENSBTAT00000026802	AUP1	5.57778	7.69068e-19	2.08942e-18	5.14981e-17	11	10093115	10096146	1484
ENSBTAT00000027744	YY1	5.38451	7.69581e-19	2.08942e-18	5.14981e-17	21	66817739	66842006	1183
ENSBTAT00000053713	SGCB	6.46479	7.70824e-19	2.08942e-18	5.14981e-17	6	69526335	69553387	4318
ENSBTAT00000010166	RPL36A	16.4695	7.84445e-19	2.11587e-18	5.21915e-17	15	54468007	54468423	417
ENSBTAT00000037702	ATP6V1E1	7.32989	7.9196e-19	2.12867e-18	5.24747e-17	5	109564503	109578159	1223
ENSBTAT00000001007	NENF	7.24977	7.96539e-19	2.13333e-18	5.25618e-17	16	73013321	73019895	907
ENSBTAT00000012161	SRP68	4.99024	8.10209e-19	2.1505e-18	5.30292e-17	19	56222967	56247688	2465
ENSBTAT00000044356	TXN	9.10842	8.09118e-19	2.1505e-18	5.30292e-17	8	101484812	101492588	512
ENSBTAT00000002616	EIF5A	14.5065	8.24247e-19	2.15789e-18	5.32111e-17	19	27648382	27653256	1256
ENSBTAT00000004101	JAK1	5.71739	8.21846e-19	2.15789e-18	5.32111e-17	3	80861479	80915019	4784
ENSBTAT00000022579	FUNDC2	10.6128	8.26207e-19	2.15789e-18	5.32111e-17	X	38815313	38838616	1006
ENSBTAT00000056240	TRDN	17.5679	8.23931e-19	2.15789e-18	5.32111e-17	9	28071827	28219689	1134
ENSBTAT00000043065	HRC	9.40995	8.36089e-19	2.17531e-18	5.3633e-17	18	56107442	56111943	2959
ENSBTAT00000003514	NEDD8	12.4475	8.40972e-19	2.17964e-18	5.37321e-17	10	20777431	20779257	309
ENSBTAT00000045202	BANF1	14.1752	8.64975e-19	2.23298e-18	5.50473e-17	29	44759486	44761429	784
ENSBTAT00000007216	ARIH2	8.96563	8.81551e-19	2.2679e-18	5.58813e-17	22	51572989	51610467	2141
ENSBTAT00000000994	PCAF	6.37028	8.95511e-19	2.27701e-18	5.61036e-17	1	44857815	44928998	2558
ENSBTAT00000003261	HNRNPUL2	6.14581	8.92556e-19	2.27701e-18	5.61036e-17	29	41730792	41739870	2286
ENSBTAT00000032643	ENSBTAT00000032643	15.0526	8.89158e-19	2.27694e-18	5.61036e-17	9	42568764	42569201	438
ENSBTAT00000027369	PIGY	8.63761	9.16033e-19	2.31881e-18	5.71668e-17	6	37677099	37679897	1283
ENSBTAT00000012454	MDH2	19.9667	9.68478e-19	2.44098e-18	6.02064e-17	25	34766932	34779637	1294
ENSBTAT00000021880	FXR1	12.1944	9.90976e-19	2.48937e-18	6.13681e-17	1	86678925	86751963	2129
ENSBTAT00000007429	TMSB10	18.4479	1.01195e-18	2.52738e-18	6.24269e-17	11	49933204	49934214	452
ENSBTAT00000022993	AAMDC	11.4489	1.01876e-18	2.54266e-18	6.26069e-17	29	18250502	18284062	480
ENSBTAT00000007527	HNRNPA2B1	11.8347	1.07476e-18	2.65716e-18	6.57973e-17	4	70198053	70207085	1656
ENSBTAT00000021223	MMADHC	8.97151	1.09687e-18	2.72131e-18	6.68966e-17	2	46648517	46664675	1306
ENSBTAT00000022077	CYSTM1	12.9421	1.11107e-18	2.73569e-18	6.75067e-17	7	53047810	53118491	809
ENSBTAT00000000299	ENSBTAT00000000299	9.2215	1.15012e-18	2.82361e-18	6.96168e-17	1	58243449	58244153	705
ENSBTAT00000042547	RPL38	14.3194	1.16604e-18	2.85737e-18	7.03161e-17	19	57835002	57839034	325
ENSBTAT00000003559	APEX1	5.22136	1.18292e-18	2.85737e-18	7.06156e-17	10	26706595	26709174	1402
ENSBTAT00000019803	CAPNS1	11.7923	1.18855e-18	2.85737e-18	7.06156e-17	18	46987527	46994449	1314
ENSBTAT00000027662	PCBP2	14.2632	1.18515e-18	2.85737e-18	7.06156e-17	5	26702879	26723947	1146
ENSBTAT00000047463	NDUFS4	11.5161	1.18317e-18	2.85737e-18	7.06156e-17	20	25407689	25523382	661
ENSBTAT00000005600	RHOA	10.7226	1.19363e-18	2.85737e-18	7.06569e-17	22	51277867	51323093	806
ENSBTAT00000024422	STAC3	14.3954	1.21179e-18	2.89476e-18	7.14692e-17	5	56524691	56530822	1634
ENSBTAT00000016526	AP2M1	6.79932	1.2213e-18	2.89745e-18	7.15061e-17	1	83583028	83591912	1879
ENSBTAT00000059270	U6	23.8943	1.21736e-18	2.89745e-18	7.15061e-17	2	43578069	43578172	104
ENSBTAT00000003602	SF3B2	4.92794	1.23706e-18	2.93428e-18	7.21664e-17	29	44803791	44817398	2873
ENSBTAT00000001993	UQCRB	18.3384	1.24949e-18	2.93666e-18	7.23669e-17	14	70329414	70334124	476
ENSBTAT00000010126	PHYH	15.8671	1.24704e-18	2.93666e-18	7.23669e-17	13	28254814	28275573	1423
ENSBTAT00000026535	PSME3	6.36197	1.26257e-18	2.94955e-18	7.28628e-17	19	43500418	43505335	945
ENSBTAT00000013845	UBXN1	9.53749	1.26773e-18	2.96234e-18	7.28991e-17	29	41701369	41704008	1076
ENSBTAT00000048868	SHFM1	21.5371	1.30669e-18	3.04477e-18	7.48719e-17	22	22098224	22098436	213
ENSBTAT00000009034	SLC35B1	5.37285	1.31755e-18	3.04633e-18	7.51863e-17	19	37546937	37553763	1262
ENSBTAT00000043179	AP2A1	4.14467	1.32152e-18	3.04633e-18	7.51863e-17	18	56592974	56620907	3148
ENSBTAT00000002513	MGC142781	12.5083	1.3544e-18	3.10459e-18	7.67857e-17	11	99576794	99589668	2588
ENSBTAT00000007099	ENSBTAT00000007099	12.7735	1.37393e-18	3.12855e-18	7.73483e-17	11	21030608	21031350	743
ENSBTAT00000047947	SSR2	7.70912	1.37154e-18	3.12855e-18	7.73483e-17	3	14808605	14815178	1081
CUFF.36337.1	PEA15	4.34347	1.38545e-18	3.15218e-18	7.74551e-17	3	9575158	9588622	5772
ENSBTAT00000028520	PSME1	6.48022	1.3852e-18	3.15218e-18	7.74551e-17	10	20846749	20849410	1002
ENSBTAT00000008411	EMC4	6.18333	1.39787e-18	3.16387e-18	7.78793e-17	10	28441593	28445103	976
ENSBTAT00000019001	TOMM70A	6.87148	1.45498e-18	3.26557e-18	8.07814e-17	1	44294568	44331743	2170
ENSBTAT00000016570	ETFA	9.46229	1.48142e-18	3.32168e-18	8.19669e-17	21	31993940	32063870	1378
ENSBTAT00000005672	COPA	5.04018	1.54026e-18	3.43275e-18	8.46685e-17	3	9468431	9512487	4339
ENSBTAT00000023937	CD164	9.01291	1.54077e-18	3.43275e-18	8.46685e-17	9	41246268	41256989	1198
ENSBTAT00000019203	PSMA4	7.42765	1.54918e-18	3.44329e-18	8.48415e-17	21	31442649	31450480	1127
ENSBTAT00000034806	UBF	5.09632	1.57857e-18	3.49804e-18	8.61575e-17	19	44648952	44660383	2343
ENSBTAT00000057439	ENSBTAT00000057439	9.33867	1.59098e-18	3.50828e-18	8.6542e-17	13	59957517	59958130	614	Uncharacterized protein [Source:UniProtKB/TrEMBL;Acc:G3MYL1]
ENSBTAT00000018492	CKM	40.629	1.6373e-18	3.60642e-18	8.87615e-17	18	53383534	53392948	1568
ENSBTAT00000049290	ENSBTAT00000049290	8.27006	1.67832e-18	3.68199e-18	9.068e-17	15	8921978	8922841	864	6S ribosomal protein L6 [Source:UniProtKB/TrEMBL;Acc:G3N2R1]
ENSBTAT00000016111	ENSBTAT00000016111	7.27462	1.70611e-18	3.72275e-18	9.15669e-17	29	45938167	45941106	1318	Bos taurus protein phosphatase 1, catalytic subunit, alpha isozyme (PPP1CA), mRNA. [Source:RefSeq mRNA;Acc:NM_135316]
ENSBTAT00000021078	TPRG1L	7.01568	1.70533e-18	3.72275e-18	9.15669e-17	16	50687998	50690794	1096
ENSBTAT00000034186	H3F3A	11.1139	1.72431e-18	3.73208e-18	9.22363e-17	16	29832591	29840787	1049
ENSBTAT00000008799	ARCN1	5.03335	1.74499e-18	3.76298e-18	9.30335e-17	15	29754474	29783172	2252
ENSBTAT00000006990	RPS6	15.0422	1.78611e-18	3.85833e-18	9.49115e-17	2	111820296	111821112	817
ENSBTAT00000027837	LAPTM4A	10.2694	1.8213e-18	3.91009e-18	9.64629e-17	11	78862495	78880461	1372
ENSBTAT00000027191	NDUFB9	13.3432	1.83928e-18	3.9401e-18	9.70957e-17	14	17132669	17140075	880
ENSBTAT00000008420	TNNT1	28.5372	1.86791e-18	3.99125e-18	9.8285e-17	18	62725898	62735263	887
ENSBTAT00000008774	SYNCRIP	5.44932	1.90553e-18	4.03705e-18	9.97441e-17	9	64722282	64744803	1993
ENSBTAT00000023255	ATP5I	13.9922	1.90803e-18	4.03705e-18	9.97441e-17	6	108851271	108852813	302
ENSBTAT00000009327	MYH1	34.2105	1.9146e-18	4.03705e-18	9.97637e-17	19	30110728	30134757	5987
ENSBTAT00000021636	SDHD	13.6538	1.97373e-18	4.15044e-18	1.02513e-16	15	22722376	22733137	480
ENSBTAT00000054271	MYL1	30.4346	1.98714e-18	4.16749e-18	1.02877e-16	2	98527573	98555234	1851
ENSBTAT00000006835	DBNDD2	11.6428	2.00166e-18	4.16749e-18	1.0296e-16	13	74458057	74462461	1153
ENSBTAT00000017150	ARL8B	7.39469	2.0143e-18	4.16749e-18	1.0296e-16	22	21327751	21374042	922
ENSBTAT00000017177	ALDOA	42.8099	2.01277e-18	4.16749e-18	1.0296e-16	25	26470488	26475202	1586
ENSBTAT00000046547	TOMM5	8.64184	1.99568e-18	4.16749e-18	1.0296e-16	8	62079195	62082501	553
ENSBTAT00000044563	FXYD1	13.7599	2.04671e-18	4.23697e-18	1.04285e-16	18	46053083	46057378	672
ENSBTAT00000044796	TPM1	40.7069	2.05793e-18	4.24421e-18	1.04526e-16	10	47056204	47065846	834
ENSBTAT00000006216	GRB2	5.88954	2.0743e-18	4.24524e-18	1.04722e-16	19	56754112	56818424	1031
ENSBTAT00000019913	JSRP1	13.8433	2.08021e-18	4.24524e-18	1.04722e-16	7	22700027	22703913	1256
ENSBTAT00000023165	PDCD6IP	5.86565	2.08131e-18	4.24524e-18	1.04722e-16	22	8092171	8160760	2894
ENSBTAT00000020081	SGTA	5.42896	2.09461e-18	4.25236e-18	1.05063e-16	7	22144022	22158441	2234
ENSBTAT00000000240	ATP6V1G1	8.41402	2.10977e-18	4.27972e-18	1.05495e-16	8	105493587	105502576	1043
ENSBTAT00000065532	RPL23A	6.40167	2.14454e-18	4.32713e-18	1.06902e-16	19	20703988	20706890	560
ENSBTAT00000002893	TRPC4AP	5.6181	2.19401e-18	4.38748e-18	1.08141e-16	13	64913710	64981620	2481
ENSBTAT00000006465	PFN1	9.70637	2.18622e-18	4.38748e-18	1.08141e-16	19	27081319	27084643	815
ENSBTAT00000015194	GBA2	5.43476	2.1934e-18	4.38748e-18	1.08141e-16	8	60316734	60327815	3271
ENSBTAT00000026531	BECN1	4.43448	2.19627e-18	4.39404e-18	1.08141e-16	19	43479259	43489432	1595
CUFF.49975.1	RPL39	8.34658	2.2442e-18	4.46029e-18	1.1e-16	X	3997527	4001625	1066
ENSBTAT00000029117	UBQLN2	6.14081	2.2477e-18	4.46659e-18	1.1e-16	X	98958218	98960092	1875
ENSBTAT00000010276	NDUFA13	14.5317	2.26149e-18	4.47284e-18	1.1034e-16	7	3721573	3729808	540
ENSBTAT00000061310	PDAP1	8.69089	2.28667e-18	4.51852e-18	1.11231e-16	25	37532740	37544696	765
ENSBTAT00000003907	LAMTOR1	6.71809	2.37022e-18	4.66229e-18	1.14948e-16	15	52508416	52514771	1056
ENSBTAT00000000926	TAF10	7.26603	2.4664e-18	4.82992e-18	1.18942e-16	15	47073272	47074686	764
ENSBTAT00000017901	PCNP	7.58139	2.46735e-18	4.82992e-18	1.18942e-16	1	46355783	46370616	2260
ENSBTAT00000012002	EIF2A	5.67902	2.52207e-18	4.9032e-18	1.2084e-16	1	118495012	118536744	2527
ENSBTAT00000019612	CHD4	4.40648	2.52923e-18	4.9032e-18	1.2084e-16	5	104186061	104214563	6320
ENSBTAT00000033091	RPS27A	16.2307	2.52539e-18	4.9032e-18	1.2084e-16	11	37823446	37825428	471
ENSBTAT00000007925	NDUFA1	10.7126	2.57537e-18	4.9606e-18	1.22319e-16	X	4068880	4072037	379
ENSBTAT00000010403	CWC15	10.457	2.57185e-18	4.9606e-18	1.22319e-16	15	15705460	15713952	1183
ENSBTAT00000011371	PRKAR1A	8.9206	2.58633e-18	4.9606e-18	1.22463e-16	19	62317497	62328889	1327
ENSBTAT00000015829	CD63	15.1688	2.59362e-18	4.9606e-18	1.22463e-16	5	57854278	57857485	850
ENSBTAT00000005580	RPL17	17.0439	2.61036e-18	4.98429e-18	1.22893e-16	21	55609537	55610119	583
ENSBTAT00000028051	SMARCD3	9.35277	2.61917e-18	4.9888e-18	1.22948e-16	4	114615444	114680160	1673
ENSBTAT00000043446	COX7B	13.7165	2.63747e-18	5.01227e-18	1.23447e-16	7	42303403	42303827	425
ENSBTAT00000006030	TOP2B	4.84654	2.68772e-18	5.07768e-18	1.25072e-16	27	40005123	40051816	5108
ENSBTAT00000010928	FKBP1A	8.91449	2.68224e-18	5.07347e-18	1.25072e-16	13	60276502	60303755	1406
ENSBTAT00000038384	ENSBTAT00000038384	12.8218	2.71259e-18	5.10069e-18	1.25866e-16	3	11468021	11468512	492
ENSBTAT00000027654	HSF1	8.29538	2.79244e-18	5.23617e-18	1.29198e-16	14	1806081	1825793	2021
ENSBTAT00000020267	RPL36A	10.3653	2.88056e-18	5.3896e-18	1.32894e-16	10	42699004	42700655	481
ENSBTAT00000043764	ATP5J2	16.9581	2.9476e-18	5.50482e-18	1.35598e-16	25	37494182	37499276	383
ENSBTAT00000021620	LSM12	5.3499	2.99125e-18	5.56357e-18	1.37214e-16	19	44509434	44529146	1979
ENSBTAT00000004519	FEM1A	15.5168	3.10253e-18	5.75186e-18	1.41914e-16	7	20565301	20568880	3580
ENSBTAT00000011658	HNRNPF	8.91416	3.12835e-18	5.79107e-18	1.4269e-16	28	13902311	13920905	2089
ENSBTAT00000023908	PTGES3	10.7994	3.20172e-18	5.90386e-18	1.45624e-16	5	57091367	57112468	1816
ENSBTAT00000037541	MRPS34	7.30684	3.41636e-18	6.29197e-18	1.54949e-16	25	1349893	1351145	1017
ENSBTAT00000027395	CLPTM1	5.61528	3.47141e-18	6.36603e-18	1.57003e-16	18	53066528	53093156	1737
ENSBTAT00000063308	NDUFB11	13.52	3.53055e-18	6.45796e-18	1.59231e-16	X	90791402	90793658	606
ENSBTAT00000006781	RPL37	14.0811	3.57906e-18	6.49486e-18	1.60308e-16	20	33667205	33669805	369
ENSBTAT00000020160	NDUFB1	13.3502	3.5843e-18	6.49486e-18	1.60308e-16	21	57388583	57395511	277
ENSBTAT00000024444	MYL2	37.0828	3.57161e-18	6.49486e-18	1.60308e-16	17	56953813	56961603	778
ENSBTAT00000002327	SIRT2	7.81536	3.68582e-18	6.65743e-18	1.64262e-16	18	48860731	48880567	1834
ENSBTAT00000056069	ENSBTAT00000056069	8.44594	3.69311e-18	6.65743e-18	1.64262e-16	3	111030118	111030977	860
ENSBTAT00000012786	ACTN2	25.1072	3.7183e-18	6.69307e-18	1.64927e-16	28	9403202	9450916	2625
ENSBTAT00000013671	RAB12	11.6734	3.78168e-18	6.78234e-18	1.67277e-16	24	41532521	41541737	960
ENSBTAT00000042554	SUMO2	7.05397	3.84624e-18	6.88901e-18	1.69667e-16	19	56923424	56931107	875
ENSBTAT00000028958	PDHB	11.0549	3.90767e-18	6.97604e-18	1.71906e-16	22	43461214	43466626	1499
ENSBTAT00000026674	ENSBTAT00000026674	7.04472	3.91928e-18	6.97604e-18	1.71946e-16	3	16358535	16366943	1646	Bos taurus chromosome 3 open reading frame, human C1orf43 (C3H1orf43), mRNA. [Source:RefSeq mRNA;Acc:NM_115666]
ENSBTAT00000061251	PTRF	11.983	3.93577e-18	6.99258e-18	1.722e-16	19	43148013	43162165	3776
ENSBTAT00000026386	POLR3K	10.0765	4.04259e-18	7.11208e-18	1.75546e-16	25	110168	112894	809
ENSBTAT00000037985	EIF3D	7.27184	4.02978e-18	7.11208e-18	1.75546e-16	5	75299356	75313533	1874
ENSBTAT00000064362	NDUFA7	11.4971	4.04494e-18	7.11208e-18	1.75546e-16	7	18191587	18198867	473
ENSBTAT00000001731	MORF4L2	11.2294	4.06946e-18	7.14398e-18	1.76067e-16	X	57744030	57756166	1793
ENSBTAT00000016130	CNBP	17.7234	4.07882e-18	7.14398e-18	1.76067e-16	22	59738963	59740707	887
ENSBTAT00000026769	CUL4A	9.774	4.13634e-18	7.22966e-18	1.78073e-16	12	90562966	90589009	2254
ENSBTAT00000045121	LAMP1	10.0137	4.18758e-18	7.29746e-18	1.79798e-16	12	90609710	90621680	2049
ENSBTAT00000029256	C10H14ORF166	11.3747	4.22645e-18	7.34753e-18	1.80984e-16	10	44879976	44894546	965
ENSBTAT00000000927	ILK	6.37096	4.29874e-18	7.386e-18	1.81944e-16	15	47074662	47082065	1693
ENSBTAT00000004728	ENSBTAT00000004728	9.58764	4.27963e-18	7.386e-18	1.81944e-16	15	83248791	83286773	1806	Uncharacterized protein [Source:UniProtKB/TrEMBL;Acc:F1MV4]
ENSBTAT00000006406	MRPL20	6.5349	4.31667e-18	7.386e-18	1.81944e-16	16	52383424	52386462	709
ENSBTAT00000014178	MEA1	6.19906	4.29829e-18	7.386e-18	1.81944e-16	23	16625357	16626996	868
ENSBTAT00000027685	FIBP	7.50998	4.3127e-18	7.386e-18	1.81944e-16	29	44665294	44669337	1217
ENSBTAT00000065971	BICD2	3.79894	4.30662e-18	7.386e-18	1.81944e-16	8	85692416	85743419	2593
ENSBTAT00000013507	NDUFS5	13.2305	4.35387e-18	7.41557e-18	1.82707e-16	3	107558702	107564198	479
ENSBTAT00000049743	UBE3A	6.85771	4.35746e-18	7.41557e-18	1.82707e-16	21	2346814	2410193	4573
ENSBTAT00000045545	CSNK2B	8.38067	4.38546e-18	7.4472e-18	1.83403e-16	23	27447511	27451477	914
ENSBTAT00000000925	UBE2R2	6.96216	4.44311e-18	7.45457e-18	1.83963e-16	8	76567996	76663653	856
ENSBTAT00000015875	RPS19	12.7663	4.431e-18	7.45457e-18	1.83963e-16	18	51689627	51697161	507
ENSBTAT00000019876	MLF2	7.77795	4.4303e-18	7.45457e-18	1.83963e-16	5	104058659	104063530	1457
ENSBTAT00000024555	PTMS	9.09545	4.44456e-18	7.45457e-18	1.83963e-16	5	104039252	104040499	769
ENSBTAT00000024092	AHCY	8.91446	4.46443e-18	7.46895e-18	1.84312e-16	13	64258560	64274274	2124
ENSBTAT00000012929	BCNT	5.06407	4.49528e-18	7.51666e-18	1.85111e-16	18	2773286	2792471	1889
ENSBTAT00000018104	UCHL5	5.61129	4.52992e-18	7.54747e-18	1.86062e-16	16	12806690	12848624	1941
ENSBTAT00000007943	P4HB	9.27294	4.56621e-18	7.57282e-18	1.86487e-16	19	51643765	51653754	2423
ENSBTAT00000012779	RWDD1	8.7034	4.57501e-18	7.57282e-18	1.86487e-16	9	34577932	34595665	1001
ENSBTAT00000014281	EIF3L	7.28152	4.56032e-18	7.57282e-18	1.86487e-16	5	110166179	110187071	1932
ENSBTAT00000013123	DARS	6.06805	4.64483e-18	7.65265e-18	1.88854e-16	2	61722452	61787886	1819
ENSBTAT00000050604	ENSBTAT00000050604	8.36292	4.69957e-18	7.71265e-18	1.9012e-16	28	21867759	21868711	953
ENSBTAT00000052506	ENSBTAT00000052506	14.7486	4.69755e-18	7.71265e-18	1.9012e-16	13	16262484	16263567	1084
ENSBTAT00000000486	SSRP1	5.0981	4.78428e-18	7.82428e-18	1.93062e-16	15	81817413	81826972	2621
ENSBTAT00000015701	SPPL2A	6.92691	4.80902e-18	7.83411e-18	1.93092e-16	10	59779604	59813156	1770
ENSBTAT00000015716	EEF1G	15.9574	4.80664e-18	7.83411e-18	1.93092e-16	29	41614571	41624167	1421
ENSBTAT00000007041	DES	32.3258	4.91283e-18	7.97709e-18	1.9677e-16	2	108075460	108082534	2236
ENSBTAT00000019596	EIF4A2	14.4448	4.96464e-18	8.03833e-18	1.98351e-16	1	81057779	81064090	1890
ENSBTAT00000018777	RAB5B	6.72252	4.99676e-18	8.07545e-18	1.99141e-16	5	57648526	57651738	1010
ENSBTAT00000024745	PSENEN	8.76399	5.01269e-18	8.07545e-18	1.99188e-16	18	46646707	46648031	590
ENSBTAT00000054442	STARD7	7.04053	5.0227e-18	8.07545e-18	1.99188e-16	11	2286338	2305243	2684
ENSBTAT00000035225	SLC25A11	11.7854	5.11104e-18	8.20003e-18	2.02194e-16	19	27089299	27092026	1454
ENSBTAT00000045066	FAU	14.4076	5.16135e-18	8.25575e-18	2.03684e-16	5	47736728	47737193	466
ENSBTAT00000008225	HSP90AA1	14.1592	5.18731e-18	8.26747e-18	2.03709e-16	21	68595873	68601204	3005
ENSBTAT00000038491	PPP2R5A	4.98918	5.17485e-18	8.25575e-18	2.03709e-16	16	73077108	73151753	3041
ENSBTAT00000018429	CHMP2A	6.18092	5.45159e-18	8.66052e-18	2.13567e-16	18	65960799	65963496	917
ENSBTAT00000038460	MP68	16.5523	5.52841e-18	8.76631e-18	2.16051e-16	21	70113045	70118400	354
ENSBTAT00000003664	U2AF2	5.44711	5.64243e-18	8.91904e-18	2.19973e-16	18	62327715	62340671	2017
ENSBTAT00000016937	UBE2M	6.38637	5.73952e-18	9.02143e-18	2.22492e-16	18	65964093	65967276	1446
ENSBTAT00000017187	THYN1	5.45705	5.76233e-18	9.02143e-18	2.22492e-16	15	84856203	84860720	888
ENSBTAT00000018509	FAM96B	9.68834	5.75309e-18	9.02143e-18	2.22492e-16	18	34754940	34756799	607
ENSBTAT00000063866	ENSBTAT00000063866	13.0454	5.76074e-18	9.02143e-18	2.22492e-16	9	42351250	42352038	789	Uncharacterized protein [Source:UniProtKB/TrEMBL;Acc:G3NK3]
ENSBTAT00000022510	CAP2	13.2801	5.85667e-18	9.1561e-18	2.25594e-16	23	39646543	39781557	1874
ENSBTAT00000020113	RAD23A	9.58993	5.89238e-18	9.18101e-18	2.26428e-16	7	13724192	13730226	1820
ENSBTAT00000016359	B2M	20.4725	5.9583e-18	9.268e-18	2.28416e-16	10	104139090	104145312	908
ENSBTAT00000039686	HIPK3	6.07221	5.98756e-18	9.29253e-18	2.28992e-16	15	64704079	64758178	3871
ENSBTAT00000010568	PPP6C	4.93714	6.0788e-18	9.38755e-18	2.31611e-16	11	96044189	96085315	1535
ENSBTAT00000012351	MYOM2	14.3104	6.08481e-18	9.38755e-18	2.31611e-16	27	312538	376193	4801
ENSBTAT00000018267	SYNPO	15.8464	6.16453e-18	9.46631e-18	2.33542e-16	7	64020057	64027999	2649
ENSBTAT00000064026	EPN1	9.87661	6.15608e-18	9.46631e-18	2.33542e-16	18	62316246	62324320	2129
ENSBTAT00000001522	NAA20	8.64456	6.21349e-18	9.47626e-18	2.33746e-16	13	39883240	39901761	1039
ENSBTAT00000011505	PRDX3	10.8809	6.19533e-18	9.47626e-18	2.33746e-16	26	39672044	39681392	1615
ENSBTAT00000025991	EIF2B4	4.40023	6.20378e-18	9.47626e-18	2.33746e-16	11	72283254	72287762	1625
ENSBTAT00000036173	CDC37	6.68796	6.35752e-18	9.68253e-18	2.38607e-16	7	16154276	16158004	1047
ENSBTAT00000019278	FERMT2	6.96049	6.38299e-18	9.69039e-18	2.39006e-16	10	65766164	65843942	3271
ENSBTAT00000020672	UBA3	4.70505	6.40782e-18	9.706e-18	2.39379e-16	22	32583221	32607984	1421
ENSBTAT00000006196	TEX2	6.87966	6.42321e-18	9.706e-18	2.39399e-16	19	49006459	49068544	3163
ENSBTAT00000028017	MOSC2	4.13791	6.47051e-18	9.759e-18	2.40604e-16	7	18269254	18283870	1419
ENSBTAT00000012773	PSMA6	10.9905	6.54419e-18	9.81923e-18	2.42225e-16	21	45974822	45998591	968
ENSBTAT00000057062	CSNK2A1	5.44385	6.53461e-18	9.81923e-18	2.42225e-16	13	61082324	61106498	1306
ENSBTAT00000017812	CHMP4B	7.09671	6.596e-18	9.86397e-18	2.43026e-16	13	63817040	63849782	1615
ENSBTAT00000064257	ENSBTAT00000064257	9.86359	6.58292e-18	9.85663e-18	2.43026e-16	10	43935668	43936221	554
ENSBTAT00000002261	GYG1	14.0649	6.61801e-18	9.87127e-18	2.4328e-16	1	120090467	120127892	1111
ENSBTAT00000006866	RPL4	14.4574	6.67948e-18	9.93805e-18	2.4498e-16	10	13318875	13323526	1389
ENSBTAT00000014187	MRPL37	6.56253	6.8036e-18	1.00936e-17	2.48965e-16	3	92586247	92603659	1450
ENSBTAT00000044128	SH3GLB1	7.45826	6.89692e-18	1.02188e-17	2.51808e-16	3	57411164	57457439	1158
ENSBTAT00000005180	SGCA	9.34299	6.98264e-18	1.02906e-17	2.53787e-16	19	37113477	37122359	1378
ENSBTAT00000063453	ENSBTAT00000063453	12.4696	6.97032e-18	1.02906e-17	2.53787e-16	X	23420854	23421141	288
ENSBTAT00000032051	HNRNPL	8.58962	7.00611e-18	1.03116e-17	2.54066e-16	18	48823774	48835620	2397
ENSBTAT00000002422	ENSBTAT00000002422	12.9926	7.10115e-18	1.04031e-17	2.56445e-16	5	70910366	70911285	920
ENSBTAT00000011403	PRDX5	7.11777	7.11948e-18	1.04031e-17	2.56445e-16	29	43229777	43232885	869
ENSBTAT00000016013	NDUFS8	11.1295	7.11158e-18	1.04031e-17	2.56445e-16	29	46205045	46208795	886
ENSBTAT00000016279	RPL5	14.6006	7.29046e-18	1.06277e-17	2.62017e-16	13	38980088	38981117	1030
ENSBTAT00000017710	ATP5B	20.8223	7.43474e-18	1.08077e-17	2.66608e-16	5	57119917	57125290	1771
ENSBTAT00000011038	CLPX	5.68696	7.465e-18	1.08272e-17	2.67098e-16	10	12041745	12071031	1940
ENSBTAT00000066170	TSC22D3	10.8305	7.63883e-18	1.10638e-17	2.72711e-16	X	59707292	59772737	794
ENSBTAT00000020937	RNF10	10.1688	7.76246e-18	1.12128e-17	2.76512e-16	17	65067805	65101419	3728
ENSBTAT00000064628	RAB1B	7.26725	7.94251e-18	1.14475e-17	2.82301e-16	29	44972615	44977021	796
ENSBTAT00000009961	ATP6V1F	6.47614	8.04201e-18	1.15298e-17	2.84294e-16	4	93640142	93642824	627
ENSBTAT00000028364	PSMB4	11.5954	8.02024e-18	1.15298e-17	2.84294e-16	3	19412241	19414600	932
ENSBTAT00000046662	RPS24	17.4073	8.05155e-18	1.15298e-17	2.84294e-16	28	33926497	33931777	539
ENSBTAT00000029167	ADCK3	14.2374	8.20556e-18	1.17332e-17	2.89098e-16	16	30656001	30703396	2864
ENSBTAT00000053822	LRRC39	11.3633	8.40231e-18	1.19785e-17	2.95383e-16	3	43251251	43272503	1334
ENSBTAT00000022650	USF2	7.15283	8.48211e-18	1.20662e-17	2.97539e-16	18	46164776	46174400	1550
ENSBTAT00000025255	COPS3	6.96867	8.55475e-18	1.21394e-17	2.99435e-16	19	35490628	35508807	1861
ENSBTAT00000019194	UBE2G1	11.5004	8.60348e-18	1.21839e-17	3.00487e-16	19	25409138	25496726	1962
ENSBTAT00000003855	WDR82P1	4.51618	8.71378e-18	1.2313e-17	3.03681e-16	22	49182445	49201056	3779
ENSBTAT00000036848	SH3BGR	17.4365	8.79538e-18	1.24134e-17	3.05863e-16	1	141029893	141100984	1083
ENSBTAT00000010159	ARF1	7.23418	8.81629e-18	1.24148e-17	3.05929e-16	7	2913860	2931918	1797
ENSBTAT00000022576	H2AFV	8.10853	9.01476e-18	1.26148e-17	3.10841e-16	4	77389255	77401081	748
ENSBTAT00000030030	ENSBTAT00000030030	25.7251	9.01576e-18	1.26148e-17	3.10841e-16	29	45230682	45242282	2716	Uncharacterized protein [Source:UniProtKB/TrEMBL;Acc:G3X7I1]
ENSBTAT00000034135	PIGC	10.6818	9.00185e-18	1.26148e-17	3.10841e-16	16	40785953	40788409	1432
ENSBTAT00000026501	MRPL40	8.22058	9.41142e-18	1.31321e-17	3.23789e-16	17	74708565	74711079	733
ENSBTAT00000004044	ITM2B	14.6895	9.61292e-18	1.33805e-17	3.29824e-16	12	18114553	18139506	1122
ENSBTAT00000012259	RER1	4.68624	9.66876e-18	1.33805e-17	3.29824e-16	16	51688692	51698728	1324
ENSBTAT00000044787	GBAS	13.1651	9.66098e-18	1.33805e-17	3.29824e-16	25	27919682	27946564	2009
ENSBTAT00000064420	NDFIP1	7.49488	9.65799e-18	1.33805e-17	3.29824e-16	7	55061328	55085013	972
ENSBTAT00000011952	DDX6	5.53106	9.85713e-18	1.36146e-17	3.35538e-16	15	29887449	29918570	6109
ENSBTAT00000005581	EEF2	16.948	9.93505e-18	1.36673e-17	3.37065e-16	7	21252438	21261327	3182
ENSBTAT00000021123	NDUFB4	11.6633	9.94385e-18	1.36673e-17	3.37065e-16	1	65922482	65928617	471
ENSBTAT00000011270	FAM98A	5.02094	1.03432e-17	1.41029e-17	3.47329e-16	11	16157514	16173332	2712
ENSBTAT00000025586	TUFM	7.52015	1.03158e-17	1.41029e-17	3.47329e-16	25	26225846	26229801	1616
ENSBTAT00000026756	MYBPC2	24.8488	1.03523e-17	1.41214e-17	3.47329e-16	18	57039094	57064720	3456
ENSBTAT00000035128	FAM114A2	4.17169	1.03535e-17	1.41214e-17	3.47329e-16	7	67287094	67321469	2079
ENSBTAT00000057156	ENSBTAT00000057156	5.67685	1.03545e-17	1.41214e-17	3.47329e-16	7	52218128	52244915	3808
ENSBTAT00000027713	RPS21	15.7591	1.04272e-17	1.41214e-17	3.4904e-16	13	55358720	55359979	352
ENSBTAT00000064159	WBSCR1	9.53961	1.06984e-17	1.44986e-17	3.57376e-16	25	33708591	33729652	2467
ENSBTAT00000007696	COPS8	6.72092	1.07674e-17	1.45736e-17	3.58937e-16	3	117179569	117192618	1601
ENSBTAT00000022382	PFDN6	6.20417	1.08194e-17	1.45736e-17	3.59925e-16	23	7405845	7407102	700
ENSBTAT00000019808	COX7A1	20.8414	1.08606e-17	1.4648e-17	3.60549e-16	18	46994991	46996544	343
ENSBTAT00000044482	ENSBTAT00000044482	9.63476	1.09421e-17	1.4648e-17	3.62507e-16	2	92993922	92995706	754	Ribosomal protein L15 [Source:UniProtKB/TrEMBL;Acc:E1BK63]
ENSBTAT00000020021	WDR55	4.67716	1.11177e-17	1.48557e-17	3.66816e-16	7	53478710	53483614	1623
ENSBTAT00000061306	MYH7	26.1136	1.10995e-17	1.48557e-17	3.66816e-16	10	21325414	21345624	5917
ENSBTAT00000009832	EIF3B	4.72999	1.11812e-17	1.48979e-17	3.68155e-16	25	41435744	41453953	3633
ENSBTAT00000000186	ANAPC16	8.06424	1.12376e-17	1.48979e-17	3.68199e-16	28	28446891	28457153	1222
ENSBTAT00000001255	MRPS16	8.6686	1.12531e-17	1.49397e-17	3.68199e-16	28	29460098	29461928	683
ENSBTAT00000004879	SCP2	7.19074	1.12802e-17	1.49397e-17	3.68199e-16	3	93846489	93968364	2624
ENSBTAT00000006613	GLRX3	6.48453	1.12347e-17	1.48979e-17	3.68199e-16	26	49742225	49773421	1211
ENSBTAT00000026525	COA3	6.74642	1.12968e-17	1.49397e-17	3.68199e-16	19	43468381	43469490	774
ENSBTAT00000017397	NAPA	6.20162	1.13693e-17	1.50414e-17	3.69812e-16	18	54902551	54928520	1722
ENSBTAT00000002843	TCEB1	8.02038	1.14691e-17	1.5082e-17	3.71437e-16	14	39328605	39348337	1033
ENSBTAT00000040333	ENSBTAT00000040333	12.1843	1.14758e-17	1.5082e-17	3.71437e-16	2	112675322	112675995	674
ENSBTAT00000057473	CASC4	4.45644	1.14885e-17	1.5082e-17	3.71437e-16	10	103802803	103891475	3235
ENSBTAT00000057360	ENSBTAT00000057360	4.07008	1.1614e-17	1.51522e-17	3.74744e-16	8	72265979	72266893	806	Rasrelated GTPbinding protein A [Source:UniProtKB/TrEMBL;Acc:G5E6C1]
ENSBTAT00000008650	KPNB1	6.39642	1.16403e-17	1.51522e-17	3.74842e-16	19	39409895	39431772	3475
ENSBTAT00000021773	LRPPRC	4.7762	1.17527e-17	1.53521e-17	3.77705e-16	11	26185559	26284636	4269
ENSBTAT00000064827	SDHA	14.0428	1.18118e-17	1.53521e-17	3.78847e-16	20	71940749	71964107	2237
ENSBTAT00000066239	CGGBP1	4.04887	1.18885e-17	1.54514e-17	3.80549e-16	1	35655412	35660398	2490
ENSBTAT00000020184	UBXN4	6.35611	1.20045e-17	1.55503e-17	3.83501e-16	2	61919643	61949692	2188
ENSBTAT00000017442	PHB2	9.1277	1.21019e-17	1.56179e-17	3.85848e-16	5	103853322	103857548	960
ENSBTAT00000016224	CYC1	13.4141	1.21386e-17	1.56179e-17	3.86251e-16	14	1930186	1932580	1214
ENSBTAT00000057576	ENSBTAT00000057576	9.95083	1.22541e-17	1.58448e-17	3.89158e-16	23	32293815	32295598	752
ENSBTAT00000013634	TTC1	6.54874	1.24111e-17	1.59108e-17	3.93179e-16	7	73708740	73757646	1460
ENSBTAT00000044331	RALY	8.32753	1.24295e-17	1.59108e-17	3.93179e-16	13	63953596	64043571	1326
ENSBTAT00000028645	NDUFV3	10.5622	1.26495e-17	1.61358e-17	3.99352e-16	1	144690277	144701618	783
ENSBTAT00000016431	CHMP5	5.4735	1.27137e-17	1.6232e-17	4.00594e-16	8	76364232	76378151	1338
ENSBTAT00000022835	PDLIM3	28.0745	1.30696e-17	1.6678e-17	4.10201e-16	27	14769571	14800205	1504
ENSBTAT00000029958	ENSBTAT00000029958	5.46198	1.30634e-17	1.6678e-17	4.10201e-16	6	72503141	72504557	1417
ENSBTAT00000024326	ATP5O	15.0944	1.31643e-17	1.674e-17	4.1237e-16	1	922635	929992	739
ENSBTAT00000024094	HMGB1	8.10592	1.32436e-17	1.674e-17	4.14048e-16	12	30352990	30357922	1245
ENSBTAT00000000709	SMEK2	3.40001	1.34012e-17	1.69607e-17	4.18163e-16	11	38099216	38150591	2752
ENSBTAT00000020880	TXNL1	10.7519	1.34816e-17	1.70542e-17	4.19859e-16	24	56404067	56446678	1174
ENSBTAT00000026449	PPP2R1A	6.69547	1.37873e-17	1.73996e-17	4.28551e-16	18	58425828	58448787	2255
ENSBTAT00000017332	UBE2L3	6.33429	1.39216e-17	1.74582e-17	4.31059e-16	17	74120669	74134769	1548
ENSBTAT00000033922	UBQLN1	4.18162	1.39069e-17	1.74582e-17	4.31059e-16	8	78223447	78279808	2379
ENSBTAT00000057594	PPP1CC	6.7496	1.39593e-17	1.75501e-17	4.31399e-16	17	56814813	56833870	2427
ENSBTAT00000020029	ECSIT	10.16	1.40993e-17	1.76416e-17	4.34891e-16	7	17085482	17097271	1477
ENSBTAT00000021397	COX4I1	17.9678	1.43031e-17	1.78235e-17	4.39493e-16	18	11800134	11807341	730
ENSBTAT00000053993	AP2A2	5.22941	1.4284e-17	1.78235e-17	4.39493e-16	29	50406823	50444533	3053
ENSBTAT00000005296	SBDS	9.25687	1.43522e-17	1.78799e-17	4.40162e-16	25	28630825	28636300	2455
ENSBTAT00000023384	EIF3C	7.23454	1.44145e-17	1.78799e-17	4.41232e-16	25	26266731	26286903	2904
ENSBTAT00000009998	FKBP4	10.4565	1.44757e-17	1.79699e-17	4.42264e-16	5	107445596	107453517	2095
ENSBTAT00000001034	ENSBTAT00000001034	12.2324	1.4757e-17	1.82379e-17	4.49154e-16	23	17867543	17873174	2275	Heat shock protein HSP 9beta [Source:UniProtKB/TrEMBL;Acc:G5E57]
ENSBTAT00000017131	SLC25A3	16.4709	1.47411e-17	1.81833e-17	4.49154e-16	5	63086353	63092547	1332
ENSBTAT00000003206	RAB11B	6.41915	1.48066e-17	1.82379e-17	4.49813e-16	7	18249534	18259141	1439
ENSBTAT00000026236	PRRC2A	4.61332	1.48812e-17	1.83266e-17	4.51229e-16	23	27475781	27488753	6534
ENSBTAT00000008967	CMYA5	16.0826	1.50272e-17	1.84149e-17	4.54799e-16	10	10658029	10711354	11820
ENSBTAT00000006409	AURKAIP1	5.91107	1.5079e-17	1.85029e-17	4.5551e-16	16	52398515	52402983	753
ENSBTAT00000013402	TPT1	23.1035	1.51536e-17	1.85905e-17	4.56908e-16	12	15518992	15522535	836
ENSBTAT00000001780	KIF1C	14.8839	1.53855e-17	1.87299e-17	4.62791e-16	19	27014446	27043780	3318
ENSBTAT00000015385	DAG1	9.55207	1.5427e-17	1.87299e-17	4.62791e-16	22	51187154	51200326	2688
ENSBTAT00000036654	MARCH6	5.66454	1.5435e-17	1.87299e-17	4.62791e-16	20	62940001	62990698	3048
ENSBTAT00000029063	RIP5	7.15317	1.54866e-17	1.88165e-17	4.63476e-16	13	66362562	66369978	1069
ENSBTAT00000000465	EIF3J	10.043	1.5642e-17	1.89027e-17	4.67259e-16	10	103984741	104002866	911
ENSBTAT00000032213	EIF4G1	8.6447	1.57868e-17	1.90743e-17	4.70709e-16	1	83466847	83484338	5056
ENSBTAT00000022949	COX5A	17.9674	1.58322e-17	1.90743e-17	4.7119e-16	21	34156312	34167331	725
ENSBTAT00000011385	WBP2	6.30283	1.5968e-17	1.92446e-17	4.74355e-16	19	56394188	56401350	1109
ENSBTAT00000035306	SKP1	9.36675	1.60231e-17	1.92446e-17	4.75115e-16	7	47389357	47401412	958
ENSBTAT00000028280	SAR1B	9.64687	1.60971e-17	1.93293e-17	4.76434e-16	7	47717606	47747828	1223
ENSBTAT00000005331	TIAL1	5.75685	1.63415e-17	1.94977e-17	4.82048e-16	26	40041404	40060834	1600
ENSBTAT00000035368	TPP2	3.76177	1.63467e-17	1.94977e-17	4.82048e-16	12	82844295	82902065	3999
ENSBTAT00000019637	ENSBTAT00000019637	6.49272	1.64449e-17	1.95815e-17	4.84058e-16	5	95536891	95549925	2514	Bos taurus WW domain binding protein 11 (WBP11), mRNA. [Source:RefSeq mRNA;Acc:NM_12645]
ENSBTAT00000010432	CALCOCO2	8.58169	1.69573e-17	2.02608e-17	4.98228e-16	19	38314473	38338074	2215
ENSBTAT00000055723	UBE2D2	6.11592	1.73712e-17	2.06998e-17	5.09459e-16	7	52414547	52457128	1812
ENSBTAT00000016943	KLHDC3	10.2095	1.74772e-17	2.07809e-17	5.11638e-16	23	16627392	16633715	1857
ENSBTAT00000014098	CUX1	4.25908	1.76174e-17	2.08617e-17	5.14806e-16	25	35243348	35515094	4545
ENSBTAT00000023247	PCMTD1	7.24742	1.77341e-17	2.09422e-17	5.17278e-16	14	22669363	22717576	3596
ENSBTAT00000054269	RING1	5.11764	1.78508e-17	2.11024e-17	5.19741e-16	23	7338399	7341500	1458
ENSBTAT00000014877	RPS6	10.0163	1.7959e-17	2.11821e-17	5.21005e-16	8	24927468	24930788	925
ENSBTAT00000029018	CUL3	7.01115	1.7933e-17	2.11024e-17	5.21005e-16	2	113372323	113487279	3000
ENSBTAT00000000576	TMEM126A	7.13074	1.81825e-17	2.13405e-17	5.26541e-16	29	9962193	9970745	727
ENSBTAT00000017097	DEK	7.59894	1.82419e-17	2.13405e-17	5.27311e-16	23	39133610	39165303	2769
ENSBTAT00000046011	UBC	26.2739	1.87481e-17	2.18875e-17	5.40974e-16	17	53142511	53143425	915
ENSBTAT00000056583	LRRFIP2	6.41856	1.90083e-17	2.21592e-17	5.47317e-16	22	10379811	10490263	2635
ENSBTAT00000057115	PDHA1	10.3158	1.90359e-17	2.21592e-17	5.47317e-16	X	130874454	130897343	4164
ENSBTAT00000018114	HNRNPAB	7.20067	1.92763e-17	2.24653e-17	5.5324e-16	7	40638057	40643916	1613
ENSBTAT00000003167	AES	9.16021	1.94172e-17	2.24653e-17	5.5432e-16	7	21977262	21983594	810
ENSBTAT00000013247	ENSBTAT00000013247	11.67	1.93597e-17	2.24653e-17	5.5432e-16	18	65621142	65621509	368	Uncharacterized protein [Source:UniProtKB/TrEMBL;Acc:E1BJ2]
ENSBTAT00000014581	ENSBTAT00000014581	6.85384	1.93997e-17	2.24653e-17	5.5432e-16	21	25651050	25668496	1229	Bos taurus mortality factor 4 like 1 (MORF4L1), mRNA. [Source:RefSeq mRNA;Acc:NM_135448]
ENSBTAT00000027684	POLR2E	7.5465	1.96706e-17	2.27321e-17	5.6056e-16	7	45195516	45199967	1297
ENSBTAT00000053207	COX7C	19.4151	1.97304e-17	2.27321e-17	5.61271e-16	10	72298985	72299176	192
ENSBTAT00000008070	ENSBTAT00000008070	11.3382	1.97741e-17	2.28072e-17	5.6152e-16	7	104576795	104577753	947
ENSBTAT00000016813	CAMK2B	6.0106	1.99249e-17	2.28418e-17	5.63815e-16	4	77706698	77797331	1896
ENSBTAT00000025484	RPS20	14.0223	1.99174e-17	2.28418e-17	5.63815e-16	14	24955079	24956324	474
ENSBTAT00000057287	RPL39	12.7261	2.03769e-17	2.33746e-17	5.75593e-16	X	97604641	97605063	379
ENSBTAT00000025397	DAD1	8.93915	2.05493e-17	2.34481e-17	5.79447e-16	10	22073358	22095132	694
ENSBTAT00000008809	EIF3E	11.6059	2.05903e-17	2.35212e-17	5.79588e-16	14	58397835	58445787	1496
ENSBTAT00000045476	ENSBTAT00000045476	17.2506	2.07383e-17	2.35942e-17	5.82736e-16	3	28623391	28623702	312	Uncharacterized protein [Source:UniProtKB/TrEMBL;Acc:E1BCK5]
ENSBTAT00000002115	MAP2K6	8.34391	2.09348e-17	2.37806e-17	5.87232e-16	19	61708769	61814973	1527
ENSBTAT00000066011	ATP5J	16.2002	2.10319e-17	2.38529e-17	5.88931e-16	1	10069815	10076995	514
ENSBTAT00000024904	LDB3	22.6359	2.10835e-17	2.39248e-17	5.89349e-16	28	41657195	41687361	1761
ENSBTAT00000029003	NDUFB2	10.8194	2.12876e-17	2.4068e-17	5.94024e-16	4	104850911	104856526	504
ENSBTAT00000010020	CPSF3L	3.32336	2.13341e-17	2.4068e-17	5.94292e-16	16	52576620	52586919	2155
ENSBTAT00000029304	EEF1B	12.3731	2.15127e-17	2.42521e-17	5.98231e-16	2	94922839	94926122	821
ENSBTAT00000027339	PARK7	14.6349	2.17879e-17	2.45058e-17	6.03798e-16	16	46249163	46265920	895
ENSBTAT00000029007	ZC3H15	2.96658	2.17667e-17	2.45058e-17	6.03798e-16	2	9849227	9870250	2009
ENSBTAT00000025235	RAB11A	6.91955	2.22002e-17	2.49126e-17	6.14168e-16	10	12691046	12710296	933
ENSBTAT00000001054	MRPL9	8.06829	2.24866e-17	2.51628e-17	6.20583e-16	3	19060353	19067401	1224
ENSBTAT00000009709	C10H15ORF24	5.49821	2.25092e-17	2.51628e-17	6.20583e-16	10	28548978	28564464	1065
ENSBTAT00000040283	ADIPOR1	7.41218	2.256e-17	2.52314e-17	6.20922e-16	16	55522005	55527367	1193
ENSBTAT00000025388	SYNGR2	9.63935	2.28424e-17	2.54113e-17	6.27621e-16	19	54611056	54614829	1492
ENSBTAT00000014035	KRTCAP2	6.09301	2.29222e-17	2.54792e-17	6.2874e-16	3	15498847	15501486	565
ENSBTAT00000044085	MAP2K4	3.39003	2.30067e-17	2.55036e-17	6.29186e-16	19	31284737	31363093	3832
ENSBTAT00000049050	SEH1L	4.42851	2.30166e-17	2.55036e-17	6.29186e-16	24	43639269	43659101	3429
ENSBTAT00000014796	FAM162A	10.4994	2.31027e-17	2.55711e-17	6.30468e-16	1	67422932	67443491	561
ENSBTAT00000012635	UQCRH	11.8641	2.37829e-17	2.6257e-17	6.46838e-16	3	100391833	100401195	866
ENSBTAT00000055320	EIF4G2	16.301	2.37474e-17	2.61909e-17	6.46838e-16	15	42435880	42446235	3654
ENSBTAT00000011677	CAPN3	13.3378	2.38977e-17	2.63228e-17	6.48866e-16	10	37828797	37885860	3381
ENSBTAT00000007088	COPZ1	5.08795	2.40723e-17	2.64539e-17	6.51409e-16	5	25838391	25857694	1897
ENSBTAT00000011824	PCBP1	15.0075	2.40625e-17	2.64539e-17	6.51409e-16	11	68383793	68385266	1474
ENSBTAT00000045508	DERL2	4.48573	2.41775e-17	2.64746e-17	6.53157e-16	19	26683195	26691719	1150
ENSBTAT00000027728	FAU	11.2757	2.42202e-17	2.64746e-17	6.53214e-16	29	43990460	43991956	449
CUFF.40820.1	UNANNOTATED	18.3133	2.44025e-17	2.66488e-17	6.57032e-16	5	9637495	9637884	390
ENSBTAT00000008253	SSR1	6.59183	2.44895e-17	2.67134e-17	6.58272e-16	23	47853793	47871932	3136
ENSBTAT00000013018	RAB18	4.58584	2.47125e-17	2.68865e-17	6.63159e-16	13	37303894	37331999	1749
ENSBTAT00000013153	ENSBTAT00000013153	7.52434	2.4843e-17	2.69505e-17	6.65552e-16	2	84413662	84414878	1199
ENSBTAT00000015044	ENSBTAT00000015044	4.38175	2.49078e-17	2.70142e-17	6.6618e-16	11	98879338	98895204	3081	Bos taurus golgin A2 (GOLGA2), mRNA. [Source:RefSeq mRNA;Acc:NM_1192195]
ENSBTAT00000024299	SRSF2	6.63766	2.50159e-17	2.70777e-17	6.67961e-16	19	55666050	55669890	3095
ENSBTAT00000044859	PSMD8	7.42998	2.5679e-17	2.77898e-17	6.84531e-16	18	48451832	48457821	1181
ENSBTAT00000014027	TMED4	6.31101	2.58831e-17	2.79598e-17	6.88833e-16	4	77540574	77543351	1616
ENSBTAT00000007436	PSMD2	8.75188	2.60218e-17	2.80214e-17	6.91382e-16	1	83491699	83501041	2935
ENSBTAT00000031069	NAA50	11.6231	2.61034e-17	2.80828e-17	6.92406e-16	1	58847733	58879203	2934
ENSBTAT00000021436	H2AFY	4.3599	2.63807e-17	2.83589e-17	6.9861e-16	7	48390758	48472188	1849
ENSBTAT00000004027	SART1	3.42651	2.64881e-17	2.84196e-17	7.00304e-16	29	44726692	44741763	3482
ENSBTAT00000004229	NR1H2	4.67101	2.70034e-17	2.89083e-17	7.12758e-16	18	56998860	57005507	2051
ENSBTAT00000044192	ENSBTAT00000044192	8.82604	2.73875e-17	2.92407e-17	7.20831e-16	7	23580042	23580833	792	Uncharacterized protein [Source:UniProtKB/TrEMBL;Acc:F1MJH2]
ENSBTAT00000055432	PPDPF	13.2569	2.73988e-17	2.92407e-17	7.20831e-16	13	54608180	54609543	503
ENSBTAT00000033663	TAX1BP1	6.3041	2.76039e-17	2.94061e-17	7.25041e-16	4	68775902	68859811	3468
ENSBTAT00000054111	ENSBTAT00000054111	6.59471	2.79007e-17	2.96773e-17	7.31645e-16	7	14670708	14672994	1659	Uncharacterized protein [Source:UniProtKB/TrEMBL;Acc:G3X861]
ENSBTAT00000031476	RRAGA	5.48711	2.80458e-17	2.97353e-17	7.34254e-16	8	25197704	25199286	1583
ENSBTAT00000013077	TPM3	26.2785	2.82997e-17	2.99565e-17	7.38499e-16	3	16376436	16395088	1106
ENSBTAT00000026358	TPI1	22.7033	2.8257e-17	2.99565e-17	7.38499e-16	5	103942403	103945759	1255
ENSBTAT00000020108	PSMD6	5.99295	2.84468e-17	2.99652e-17	7.3994e-16	22	37538101	37556710	1337
ENSBTAT00000027243	HMG20A	3.08213	2.84292e-17	2.99652e-17	7.3994e-16	21	33083549	33160047	3611
ENSBTAT00000011076	VPS29	4.50704	2.86321e-17	3.01275e-17	7.43557e-16	17	56617708	56622846	943
ENSBTAT00000003636	PSMA3	8.79931	2.88392e-17	3.02894e-17	7.4773e-16	10	70797328	70822594	931
ENSBTAT00000005327	YWHAG	13.5126	2.92959e-17	3.07657e-17	7.58351e-16	25	34884283	34906639	1414
ENSBTAT00000017030	PDLIM5	17.6345	2.97472e-17	3.11356e-17	7.68795e-16	6	31419270	31567339	1852
ENSBTAT00000007135	PSMC1	8.65446	2.99046e-17	3.1245e-17	7.70526e-16	10	102920826	102933425	1534
ENSBTAT00000023150	KPNA4	9.58997	2.99099e-17	3.1245e-17	7.70526e-16	1	107774353	107834443	1566
ENSBTAT00000025963	RPL10A	10.3351	3.00738e-17	3.13536e-17	7.73512e-16	23	9391523	9394013	713
ENSBTAT00000053498	MBD2	5.43814	3.01352e-17	3.13536e-17	7.73855e-16	24	54044363	54093578	845
ENSBTAT00000025109	C19orf47	6.5098	3.06971e-17	3.19277e-17	7.87028e-16	18	49964825	49980185	1371
ENSBTAT00000008621	PSMA1	8.70009	3.16079e-17	3.28115e-17	8.09092e-16	15	38745761	38758646	1155
ENSBTAT00000007165	POLR2J	6.88576	3.18846e-17	3.30704e-17	8.1488e-16	25	35091300	35095676	579
ENSBTAT00000015581	RAB5C	5.5847	3.20127e-17	3.31215e-17	8.16857e-16	19	42898002	42903081	1545
ENSBTAT00000017816	PSMB6	9.27712	3.22973e-17	3.33791e-17	8.22815e-16	19	27198593	27200805	801
ENSBTAT00000017091	PDZD11	5.18162	3.29503e-17	3.40486e-17	8.38124e-16	X	85450103	85453009	1016
ENSBTAT00000018947	TARS	5.14598	3.42752e-17	3.53341e-17	8.70449e-16	20	40349625	40373064	2797
ENSBTAT00000048862	C6ORF106	8.38216	3.50068e-17	3.59984e-17	8.87629e-16	23	8591963	8688924	1019
ENSBTAT00000025422	UQCRC1	13.745	3.53588e-17	3.63526e-17	8.95146e-16	22	51847305	51856057	1569
ENSBTAT00000003403	SLC44A2	6.4115	3.58372e-17	3.67056e-17	9.05832e-16	7	16342924	16357620	3255
ENSBTAT00000004161	RPL35	10.2225	3.59705e-17	3.68528e-17	9.07776e-16	11	95850116	95854734	928
ENSBTAT00000022303	PCTK1	4.01441	3.62151e-17	3.69996e-17	9.1252e-16	X	90853944	90865344	3080
ENSBTAT00000044652	DYNC1H1	5.55889	3.64841e-17	3.72479e-17	9.1786e-16	21	68507134	68568024	14184
ENSBTAT00000009159	ENSBTAT00000009159	6.86833	3.67402e-17	3.73936e-17	9.22514e-16	X	38597970	38599160	1191
ENSBTAT00000025582	ADCY2	9.89112	3.67837e-17	3.74371e-17	9.22514e-16	20	65505171	65653865	2970
ENSBTAT00000028330	SNRPD3	8.63398	3.69751e-17	3.7582e-17	9.25873e-16	17	73479566	73484880	555
ENSBTAT00000002695	PRPF4B	3.36157	3.71939e-17	3.77265e-17	9.29906e-16	23	49953453	49977845	4137
ENSBTAT00000018092	WDR1	6.92506	3.73162e-17	3.77692e-17	9.30942e-16	6	110136880	110178474	2753
ENSBTAT00000019928	LAMTOR5	7.41303	3.7351e-17	3.78119e-17	9.30942e-16	3	33134982	33139308	614
ENSBTAT00000026568	METAP2	6.40565	3.75064e-17	3.78544e-17	9.3337e-16	5	25255494	25286217	1916
ENSBTAT00000029894	NAP1L4	7.66892	3.80824e-17	3.84007e-17	9.46242e-16	29	49264642	49316917	2208
ENSBTAT00000065262	ENSBTAT00000065262	8.34376	3.82733e-17	3.85428e-17	9.49519e-16	X	36171714	36172838	1125
ENSBTAT00000006430	DCTN1	5.55267	3.83753e-17	3.8584e-17	9.50586e-16	11	10235834	10253077	4094
ENSBTAT00000022189	ENSBTAT00000022189	27.1679	3.86069e-17	3.87254e-17	9.54854e-16	X	66722399	66723397	999
ENSBTAT00000061386	UBR3	10.2888	3.96829e-17	3.97245e-17	9.79961e-16	2	26361548	26565226	7041
ENSBTAT00000022078	PFDN1	10.8268	3.97591e-17	3.97245e-17	9.80193e-16	7	53119765	53193428	695
ENSBTAT00000029254	NFYC	4.3393	3.98141e-17	3.97245e-17	9.80193e-16	3	106047152	106111674	1464
ENSBTAT00000011484	SSB	6.45221	3.9891e-17	3.97245e-17	9.80349e-16	2	26591742	26599728	2432
ENSBTAT00000054161	MTCH1	7.62456	3.99422e-17	3.97245e-17	9.80349e-16	23	10854192	10873802	1989
ENSBTAT00000019979	MRPL11	6.47059	4.0105e-17	3.98628e-17	9.82846e-16	29	45127205	45130554	827
ENSBTAT00000014236	THRA	6.01752	4.05168e-17	4.01993e-17	9.9143e-16	19	41017271	41042023	2391
ENSBTAT00000024431	R3HDM2	3.28649	4.09354e-17	4.05347e-17	1.00015e-15	5	56477490	56522167	3153
ENSBTAT00000013707	ARPC2	8.78558	4.16946e-17	4.12649e-17	1.01716e-15	2	106978526	107006143	1371
ENSBTAT00000061000	NEB	20.6484	4.19193e-17	4.14001e-17	1.02109e-15	2	44547340	44754701	20768
ENSBTAT00000017211	SERBP1	9.9966	4.24267e-17	4.18309e-17	1.03189e-15	3	78243808	78257967	1323
ENSBTAT00000061343	NCOR1	3.50063	4.24941e-17	4.18663e-17	1.03197e-15	19	33945404	34043863	7650
ENSBTAT00000011617	NBR1	5.65196	4.27466e-17	4.19368e-17	1.03504e-15	19	43785335	43812243	3188
ENSBTAT00000016153	SNRPD2	9.07912	4.27488e-17	4.19368e-17	1.03504e-15	18	53681070	53683928	531
ENSBTAT00000005628	NDUFA8	11.7316	4.2925e-17	4.207e-17	1.03774e-15	11	93011815	93029730	797
ENSBTAT00000011109	LARP1	5.10776	4.30441e-17	4.21048e-17	1.03906e-15	7	67988299	68007480	3166
ENSBTAT00000006162	CDK9	5.52326	4.3194e-17	4.21742e-17	1.03956e-15	11	98474464	98478912	1722
ENSBTAT00000029119	STRN3	4.34345	4.31882e-17	4.21742e-17	1.03956e-15	21	41964003	42070978	4071
ENSBTAT00000005930	RAF1	8.27902	4.33102e-17	4.22087e-17	1.0408e-15	22	57122412	57204951	1215
ENSBTAT00000014219	KBTBD10	25.4672	4.3757e-17	4.2569e-17	1.04841e-15	2	26780742	26798046	2112
ENSBTAT00000044229	SUPT5H	3.8992	4.37525e-17	4.2569e-17	1.04841e-15	18	49403804	49430177	3527
ENSBTAT00000048357	BZW2	10.096	4.39812e-17	4.26999e-17	1.05222e-15	4	25097884	25161432	1790
ENSBTAT00000025198	USP19	4.60675	4.412e-17	4.27334e-17	1.05397e-15	22	51470661	51482027	4768
ENSBTAT00000008894	SUCLA2	11.4214	4.45092e-17	4.30572e-17	1.06169e-15	12	17884901	17930933	2137
ENSBTAT00000009098	ABCF1	5.64635	4.50176e-17	4.34765e-17	1.07223e-15	23	28199129	28211340	2565
ENSBTAT00000010518	ENSBTAT00000010518	7.87657	4.54455e-17	4.37336e-17	1.07923e-15	6	103930900	103931310	411
ENSBTAT00000013860	MFN1	6.03427	4.54389e-17	4.37336e-17	1.07923e-15	1	88263740	88387147	3171
ENSBTAT00000026724	TXNIP	19.6097	4.55759e-17	4.38616e-17	1.08073e-15	3	21489097	21493251	2857
ENSBTAT00000025503	NPRL2	3.47709	4.58119e-17	4.39892e-17	1.08473e-15	22	50568310	50571594	1375
ENSBTAT00000014801	NDUFA4	21.3295	4.61962e-17	4.43082e-17	1.09223e-15	4	18973421	18980828	573
ENSBTAT00000028983	PSMC3	9.97244	4.69325e-17	4.49136e-17	1.10801e-15	15	78452426	78458542	1610
ENSBTAT00000011134	LSG1	2.72945	4.76055e-17	4.54506e-17	1.12137e-15	1	73484533	73507108	2296
ENSBTAT00000012551	SUCLG2	8.75731	4.76379e-17	4.54506e-17	1.12137e-15	22	33977312	34251728	2291
ENSBTAT00000013000	SUMO1	6.56029	4.78507e-17	4.56703e-17	1.12474e-15	2	91155252	91180862	1152
ENSBTAT00000043093	MSL1	3.55954	4.80885e-17	4.57942e-17	1.12868e-15	19	41069311	41079135	2371
ENSBTAT00000026002	COX6A2	18.9393	4.85055e-17	4.61078e-17	1.1368e-15	25	27737582	27738205	381
ENSBTAT00000056227	TXLNB	9.92119	4.85758e-17	4.61357e-17	1.1368e-15	9	77937305	77996890	2413
ENSBTAT00000010697	SNW1	3.57385	4.89652e-17	4.64479e-17	1.14425e-15	10	89923193	89958906	2100
ENSBTAT00000009923	GLUD1	6.00703	4.91873e-17	4.65699e-17	1.14777e-15	28	41941042	41979591	2446
ENSBTAT00000032574	CMC2	7.79076	4.97639e-17	4.70696e-17	1.15955e-15	7	81396101	81396804	704
ENSBTAT00000001303	RAB10	8.13514	5.01083e-17	4.72847e-17	1.16589e-15	11	73335436	73400455	2274
ENSBTAT00000013079	RPS3A	13.2336	5.03375e-17	4.7405e-17	1.16953e-15	17	6703060	6707745	865
ENSBTAT00000025191	QARS	4.86363	5.07366e-17	4.77131e-17	1.1771e-15	22	51484253	51491566	2338
ENSBTAT00000001464	CACYBP	7.94617	5.13783e-17	4.83023e-17	1.19028e-15	16	57694739	57705495	1200
ENSBTAT00000065097	ENSBTAT00000065097	8.03416	5.27026e-17	4.94528e-17	1.2192e-15	21	66764061	66764393	333	Uncharacterized protein [Source:UniProtKB/TrEMBL;Acc:G3MZB6]
ENSBTAT00000003437	DNAJC7	5.4661	5.30605e-17	4.97566e-17	1.22572e-15	19	42781320	42809906	1800
ENSBTAT00000019453	GPAA1	5.22126	5.41899e-17	5.07146e-17	1.25002e-15	14	1942672	1945910	1933
ENSBTAT00000008902	LARS	3.11266	5.42713e-17	5.07355e-17	1.2501e-15	7	59319662	59382124	3853
ENSBTAT00000022946	VBP1	7.72835	5.44439e-17	5.07563e-17	1.25229e-15	X	38609347	38633977	864
ENSBTAT00000024313	WAC	5.57874	5.4831e-17	5.09838e-17	1.2576e-15	13	36372779	36448920	2230
ENSBTAT00000024387	TMSB4	14.1379	5.47973e-17	5.09838e-17	1.2576e-15	X	140973702	140975767	614
ENSBTAT00000011643	JPH1	11.8838	5.49679e-17	5.10971e-17	1.25895e-15	14	39633189	39725607	4448
ENSBTAT00000005126	AAMP	6.50529	5.5071e-17	5.11173e-17	1.25951e-15	2	107015360	107020262	1769
ENSBTAT00000000700	LRRC28	8.10932	5.56833e-17	5.16007e-17	1.27171e-15	21	7411027	7600816	1408
ENSBTAT00000011513	CUL1	5.93721	5.59947e-17	5.17318e-17	1.27521e-15	4	112756838	112809775	2398
ENSBTAT00000022821	LARP4	3.72776	5.59371e-17	5.17126e-17	1.27521e-15	5	29604412	29651275	1863
ENSBTAT00000027660	GSK3A	4.92101	5.61115e-17	5.1751e-17	1.27606e-15	18	51362253	51371564	1571
ENSBTAT00000023945	EGLN2	4.85139	5.66193e-17	5.21386e-17	1.28579e-15	18	50326698	50334391	1774
ENSBTAT00000012303	MAPKAPK5	3.39974	5.68306e-17	5.22491e-17	1.28877e-15	17	64508406	64530237	1477
ENSBTAT00000002142	CUTA	6.58774	5.71399e-17	5.24512e-17	1.29397e-15	23	7534224	7535613	627
ENSBTAT00000019661	NISCH	2.25298	5.73439e-17	5.2561e-17	1.29676e-15	22	48912232	48985439	4901
ENSBTAT00000065849	ENSBTAT00000065849	11.7437	5.76907e-17	5.28537e-17	1.30277e-15	X	101428040	101428600	561
ENSBTAT00000046016	ENSBTAT00000046016	8.18966	5.79738e-17	5.30541e-17	1.30733e-15	3	18288308	18288811	504	Uncharacterized protein [Source:UniProtKB/TrEMBL;Acc:E1BEF1]
ENSBTAT00000031993	ECH1	8.19978	5.82834e-17	5.32539e-17	1.31248e-15	18	48811368	48820509	1185
ENSBTAT00000006760	PSMA7	12.7496	5.87216e-17	5.34697e-17	1.31866e-15	13	55501437	55506984	947
ENSBTAT00000026932	CASQ1	26.0076	5.87005e-17	5.34697e-17	1.31866e-15	3	9591852	9601502	1874
ENSBTAT00000017588	COPG1	6.0277	5.88974e-17	5.35772e-17	1.32076e-15	22	59799131	59816732	2806
ENSBTAT00000022227	RAB1A	6.19244	5.90711e-17	5.36844e-17	1.32282e-15	11	63429725	63458558	1415
ENSBTAT00000002080	TM9SF2	5.60304	5.91675e-17	5.37005e-17	1.32313e-15	12	80317273	80373389	2040
ENSBTAT00000010257	IGBP1	4.65036	5.93592e-17	5.38072e-17	1.32558e-15	X	85588917	85635721	1880
ENSBTAT00000013075	DDX1	7.00363	5.98657e-17	5.4185e-17	1.33504e-15	11	82824017	82855964	2485
ENSBTAT00000024583	SSR3	7.95292	6.04109e-17	5.45617e-17	1.34533e-15	1	111996968	112008219	833
ENSBTAT00000022652	PKN1	7.67631	6.11735e-17	5.5208e-17	1.36043e-15	7	12402304	12426189	2885
ENSBTAT00000012542	NDUFB10	13.2856	6.19748e-17	5.58525e-17	1.37635e-15	25	1517626	1520287	727
ENSBTAT00000029090	DDX39B	8.92911	6.20962e-17	5.58656e-17	1.37715e-15	23	27565924	27576711	1646
ENSBTAT00000013734	C1QBP	6.6976	6.22151e-17	5.58785e-17	1.37789e-15	19	26724673	26730100	1192
ENSBTAT00000007571	FUS	7.6086	6.27164e-17	5.62504e-17	1.38708e-15	25	27523969	27533988	1757
ENSBTAT00000019182	MTMR10	3.60359	6.28271e-17	5.62628e-17	1.38763e-15	21	27947773	27984436	2932
ENSBTAT00000024427	TMEM109	8.32293	6.33888e-17	5.67225e-17	1.39811e-15	29	37833099	37841873	1996
ENSBTAT00000024515	PSMD7	9.6228	6.35409e-17	5.67343e-17	1.39955e-15	18	37108019	37115996	1118
ENSBTAT00000006129	RDX	6.30939	6.44726e-17	5.73922e-17	1.41427e-15	15	20589674	20650077	4112
ENSBTAT00000016712	HSPE1	14.9068	6.44024e-17	5.73814e-17	1.41427e-15	2	86449525	86451564	478
ENSBTAT00000020865	SMU1	4.54782	6.44092e-17	5.73814e-17	1.41427e-15	8	76122540	76152278	1979
ENSBTAT00000055279	KCMF1	10.0966	6.46404e-17	5.7403e-17	1.41602e-15	11	49779932	49811675	1222
ENSBTAT00000008903	MRPL13	5.78559	6.53057e-17	5.79461e-17	1.42793e-15	14	84125770	84167593	797
ENSBTAT00000027944	RRAS	7.00123	6.53613e-17	5.79561e-17	1.42793e-15	18	56497094	56501119	896
ENSBTAT00000008569	SOD2	11.9552	6.58083e-17	5.82316e-17	1.43574e-15	9	97399159	97404522	413
ENSBTAT00000064928	EMC10	8.07898	6.63346e-17	5.85947e-17	1.44527e-15	18	57071805	57078304	1896
ENSBTAT00000019134	EIF3I	9.519	6.73917e-17	5.94863e-17	1.46632e-15	2	122128559	122136316	1194
ENSBTAT00000007369	COX6B1	12.3984	6.7584e-17	5.9502e-17	1.46654e-15	5	94363786	94364264	479
ENSBTAT00000023461	AKT1	6.02063	6.75438e-17	5.94942e-17	1.46654e-15	21	70878138	70895537	1841
ENSBTAT00000006754	PSMD1	6.73392	6.76891e-17	5.95099e-17	1.46684e-15	2	119675723	119756976	3161
ENSBTAT00000019746	ZC3H7A	3.85743	6.7895e-17	5.96054e-17	1.46933e-15	25	10496621	10522623	3112
ENSBTAT00000002653	PTPN11	4.97634	6.89591e-17	6.04087e-17	1.48835e-15	17	64010592	64056567	2629
ENSBTAT00000063025	TNNI1	24.8526	6.89358e-17	6.04021e-17	1.48835e-15	16	49293852	49303508	743
ENSBTAT00000000791	CCNI	7.4451	6.95355e-17	6.0765e-17	1.49878e-15	6	93633306	93672214	2991
ENSBTAT00000001839	AKT2	6.35997	7.033e-17	6.13823e-17	1.51388e-15	18	49904012	49950072	1641
ENSBTAT00000063362	ENSBTAT00000063362	6.46777	7.09881e-17	6.19107e-17	1.52601e-15	16	31136171	31137374	1204
ENSBTAT00000022411	YWHAB	6.32583	7.23383e-17	6.29602e-17	1.55296e-15	13	74018886	74040819	2695
ENSBTAT00000028721	RANBP9	4.11103	7.27041e-17	6.31402e-17	1.55666e-15	23	42736705	42795080	2477
ENSBTAT00000047412	PKM2	23.9529	7.26089e-17	6.31373e-17	1.55666e-15	10	18965984	18992445	2273
ENSBTAT00000013971	TMEM11	6.22169	7.29911e-17	6.33165e-17	1.56073e-15	19	35816342	35825642	882
ENSBTAT00000020036	CFL2	16.0425	7.32814e-17	6.34924e-17	1.56486e-15	21	45519654	45522305	1373
ENSBTAT00000016104	SIX1	8.19016	7.35256e-17	6.35813e-17	1.56799e-15	10	73068706	73072802	2083
ENSBTAT00000007942	ENSBTAT00000007942	18.9028	7.42652e-17	6.41883e-17	1.58167e-15	27	15623109	15623317	209
ENSBTAT00000015459	STK11	6.03771	7.43634e-17	6.41898e-17	1.58167e-15	7	45282199	45289554	1104
ENSBTAT00000031642	SNX14	2.58216	7.53549e-17	6.49668e-17	1.60065e-15	9	64765558	64849604	3000
ENSBTAT00000014038	PPP3R1	11.1051	7.55514e-17	6.50533e-17	1.60271e-15	11	66582636	66642276	841
ENSBTAT00000025055	MIA3	2.3571	7.60247e-17	6.53114e-17	1.61002e-15	16	26803253	26862483	9838
ENSBTAT00000026031	CRBN	5.45328	7.60961e-17	6.53114e-17	1.61002e-15	22	23229272	23251050	1953
ENSBTAT00000006847	RPN1	5.51623	7.70908e-17	6.59962e-17	1.62679e-15	22	59952594	59965985	2206
ENSBTAT00000022299	UBA1	7.08553	7.69935e-17	6.59962e-17	1.62679e-15	X	90831727	90850346	3394
ENSBTAT00000009477	STT3A	3.89079	7.75972e-17	6.63373e-17	1.63533e-15	29	29374406	29395597	2449
ENSBTAT00000028486	ANP32B	11.1838	7.83527e-17	6.69335e-17	1.64909e-15	8	63617041	63630082	493
ENSBTAT00000014699	RTCB	3.69595	7.86673e-17	6.71019e-17	1.65355e-15	5	71366686	71388046	2550
ENSBTAT00000025026	SNX3	12.7275	7.94523e-17	6.76957e-17	1.66788e-15	9	42370448	42417660	1294
ENSBTAT00000029268	RBM17	2.62825	7.97794e-17	6.78626e-17	1.67256e-15	13	17486172	17509050	2614
ENSBTAT00000063756	ENSBTAT00000063756	7.63697	8.00764e-17	6.80292e-17	1.67661e-15	11	46404611	46404925	315
ENSBTAT00000007124	ENSBTAT00000007124	14.2419	8.04934e-17	6.82801e-17	1.68315e-15	1	51022816	51023423	608	Uncharacterized protein [Source:UniProtKB/TrEMBL;Acc:G8JKW3]
ENSBTAT00000039344	ENSBTAT00000039344	8.29521	8.13621e-17	6.89539e-17	1.69911e-15	13	51930067	51930888	822	Superoxide dismutase [CuZn] [Source:UniProtKB/TrEMBL;Acc:F1MNQ4]
ENSBTAT00000022210	CLTC	6.35272	8.20559e-17	6.94568e-17	1.71138e-15	19	10848574	10889456	5195
ENSBTAT00000001330	CKMT2	21.3723	8.24288e-17	6.96205e-17	1.71693e-15	7	83554315	83579633	1470
ENSBTAT00000020561	SYPL2	13.3801	8.42566e-17	7.11338e-17	1.75273e-15	3	34082543	34095369	1287
ENSBTAT00000000341	YKT6	5.26357	8.49825e-17	7.16237e-17	1.76555e-15	4	77802985	77810784	981
ENSBTAT00000011603	ENSBTAT00000011603	4.69848	8.51313e-17	7.16237e-17	1.76636e-15	3	101022239	101054545	1619	Bos taurus GCrich promoter binding protein 1like 1 (GPBP1L1), mRNA. [Source:RefSeq mRNA;Acc:NM_125575]
ENSBTAT00000005489	VEZF1	4.50583	8.5649e-17	7.19518e-17	1.77482e-15	19	9007494	9019157	3527
ENSBTAT00000037682	DDX17	8.5224	8.6234e-17	7.2363e-17	1.78465e-15	5	110675824	110691542	2264
ENSBTAT00000028740	DDB1	4.44803	8.67499e-17	7.26893e-17	1.79302e-15	29	40509559	40537404	4147
ENSBTAT00000057514	STUB1	8.93657	8.6924e-17	7.27636e-17	1.79431e-15	25	558378	560734	1280
ENSBTAT00000008410	NUTF2	8.95607	8.71828e-17	7.29213e-17	1.79735e-15	18	35476833	35491550	868
ENSBTAT00000015172	HSPA9	9.50541	8.76547e-17	7.32457e-17	1.80477e-15	7	51506219	51521515	2304
ENSBTAT00000003219	PANK4	3.34983	8.89337e-17	7.41531e-17	1.82876e-15	16	51589109	51604672	2676
ENSBTAT00000026393	AARS	5.97159	8.97307e-17	7.47249e-17	1.8428e-15	18	1829597	1850873	3449
ENSBTAT00000011401	TRMT112	4.82662	9.0348e-17	7.51289e-17	1.85311e-15	29	43228263	43229598	992
ENSBTAT00000002532	VTI1B	6.16626	9.05522e-17	7.52826e-17	1.85494e-15	10	80113761	80131964	1070
ENSBTAT00000044965	OAZ2	6.68398	9.14677e-17	7.59339e-17	1.87131e-15	10	45428932	45433129	1950
ENSBTAT00000017987	CHMP7	4.3083	9.1878e-17	7.6169e-17	1.87732e-15	8	71228581	71251787	2874
ENSBTAT00000043916	CDC42	10.4562	9.3539e-17	7.73969e-17	1.90884e-15	2	131341266	131359925	964
ENSBTAT00000000930	UBAP2	3.51114	9.41547e-17	7.78777e-17	1.91897e-15	8	76668494	76759843	3460
ENSBTAT00000065901	CACNA1S	8.12017	9.50162e-17	7.84398e-17	1.93408e-15	16	81472038	81527931	5443
ENSBTAT00000015525	TIMM23	8.85874	9.52966e-17	7.8489e-17	1.93489e-15	28	44397814	44418582	1128
ENSBTAT00000018762	SRPR	8.11659	9.51895e-17	7.8489e-17	1.93489e-15	29	29986076	29991236	1883
ENSBTAT00000014734	RPS29	24.2643	9.56702e-17	7.86034e-17	1.93759e-15	10	26814899	26815069	171
ENSBTAT00000030281	ENSBTAT00000030281	7.3453	9.56159e-17	7.86034e-17	1.93759e-15	29	28137005	28137881	877
ENSBTAT00000001018	DNAJB6	6.4739	9.58191e-17	7.86034e-17	1.93817e-15	4	119431678	119447704	1351
ENSBTAT00000015579	TCAP	30.2842	9.64866e-17	7.90612e-17	1.94922e-15	19	40691138	40692346	981
ENSBTAT00000027160	PAIP1	6.57098	9.66436e-17	7.90612e-17	1.94995e-15	20	31284382	31311777	1690
ENSBTAT00000061641	UBE2E3	6.56557	9.69768e-17	7.90912e-17	1.95042e-15	2	15671752	15761822	696
ENSBTAT00000064188	ENSBTAT00000064188	10.0089	9.69129e-17	7.90912e-17	1.95042e-15	8	64586967	64587266	300	NADH dehydrogenase [ubiquinone] 1 alpha subcomplex subunit 2 [Source:UniProtKB/TrEMBL;Acc:G3MZ4]
ENSBTAT00000064594	PL-5283	5.83141	9.70303e-17	7.90912e-17	1.95042e-15	4	100261072	100277950	2024
ENSBTAT00000038548	ENSBTAT00000038548	4.83835	9.72101e-17	7.91555e-17	1.9516e-15	5	25306648	25307206	559	Uncharacterized protein [Source:UniProtKB/TrEMBL;Acc:G3MWY4]
ENSBTAT00000024793	RABAC1	9.97604	9.74372e-17	7.92196e-17	1.95372e-15	18	51607794	51610670	796
ENSBTAT00000003442	NKIRAS2	3.58249	9.76541e-17	7.93647e-17	1.95563e-15	19	42812569	42816762	1759
ENSBTAT00000044452	RFWD2	3.21195	9.8062e-17	7.95907e-17	1.96136e-15	16	58600678	58838844	2568
ENSBTAT00000052059	HNRNPU	7.58507	9.85728e-17	7.98971e-17	1.96913e-15	16	33163184	33172676	2896
ENSBTAT00000002878	FBXO31	7.11639	1.01358e-16	8.17404e-17	2.02225e-15	18	12974880	13009289	1524
ENSBTAT00000008669	CCNG1	16.7393	1.01559e-16	8.24476e-17	2.02376e-15	7	77249997	77257261	2316
ENSBTAT00000015617	ENSBTAT00000015617	8.14184	1.03304e-16	8.3153e-17	2.056e-15	5	104740723	104741272	550	Uncharacterized protein [Source:UniProtKB/TrEMBL;Acc:E1BCK8]
ENSBTAT00000030639	API5	4.50265	1.0532e-16	8.4663e-17	2.09352e-15	15	74303493	74321171	1794
ENSBTAT00000017580	SLC25A4	24.718	1.07713e-16	8.67606e-17	2.13751e-15	27	14546020	14550037	1346
ENSBTAT00000033787	DLD	10.8785	1.07798e-16	8.67606e-17	2.13751e-15	4	49230967	49257713	2271
ENSBTAT00000012511	SMDT1	10.4266	1.08065e-16	8.67606e-17	2.14017e-15	5	113570339	113574038	616
ENSBTAT00000002651	COX8B	11.3937	1.08975e-16	8.74563e-17	2.15554e-15	11	107244220	107246853	1405
ENSBTAT00000008508	GNB2	6.37784	1.09704e-16	8.80424e-17	2.16729e-15	25	36446227	36451406	1532
ENSBTAT00000006331	MRPL35	9.38118	1.10215e-16	8.80424e-17	2.17472e-15	11	48529514	48535995	750
ENSBTAT00000025904	ELP5	5.4292	1.11226e-16	8.8734e-17	2.19198e-15	19	27596778	27602464	1167
ENSBTAT00000036093	ENSBTAT00000036093	11.2013	1.11665e-16	8.94239e-17	2.19794e-15	22	7111728	7112287	560
ENSBTAT00000025262	PUM1	3.45141	1.1327e-16	9.01122e-17	2.2268e-15	2	123070708	123196529	5450
ENSBTAT00000008884	SMAP	5.44061	1.13535e-16	9.07988e-17	2.2293e-15	15	36224848	36251371	2877
ENSBTAT00000025142	IPO13	8.54026	1.14753e-16	9.14837e-17	2.25048e-15	3	102682317	102701941	3548
ENSBTAT00000022592	PIN1	7.79672	1.15625e-16	9.2055e-17	2.26438e-15	7	15532998	15545250	1024
ENSBTAT00000057452	LAMC1	6.18607	1.15743e-16	9.2055e-17	2.26438e-15	22	51456200	51470441	5579
ENSBTAT00000013287	FBXO3	4.90391	1.18288e-16	9.35285e-17	2.31136e-15	15	65186337	65219692	2290
ENSBTAT00000001782	PMPCA	5.5248	1.18573e-16	9.40927e-17	2.31411e-15	11	103916755	103926395	2318
ENSBTAT00000043537	SERBP1	6.33027	1.19228e-16	9.40927e-17	2.32409e-15	3	78243822	78258243	1775
ENSBTAT00000018886	PRKAR2A	8.78732	1.20079e-16	9.47687e-17	2.33785e-15	22	51658044	51727840	1550
ENSBTAT00000004984	PSMB3	8.82359	1.20875e-16	9.5213e-17	2.34877e-15	19	39980435	39989908	751
ENSBTAT00000008146	ST13	7.89003	1.21078e-16	9.5213e-17	2.34877e-15	5	112612771	112636488	3391
ENSBTAT00000024553	NUMA1	5.05065	1.2095e-16	9.5213e-17	2.34877e-15	15	52419502	52450409	6669
ENSBTAT00000001374	HIBADH	7.57596	1.21943e-16	9.57691e-17	2.3627e-15	4	68926598	69034386	1820
ENSBTAT00000019562	SMARCC2	3.67081	1.22145e-16	9.57691e-17	2.36377e-15	5	57467337	57484118	3374
ENSBTAT00000005656	HDLBP	7.50756	1.23399e-16	9.63226e-17	2.38403e-15	3	120904562	120960962	3962
ENSBTAT00000015619	MRPL14	6.51885	1.23488e-16	9.63226e-17	2.38403e-15	23	17644487	17647839	1270
ENSBTAT00000002506	RAD23B	9.98316	1.24345e-16	9.69894e-17	2.39771e-15	8	98681864	98726100	2845
ENSBTAT00000056276	LDHA	22.8626	1.24678e-16	9.7538e-17	2.40125e-15	29	26543861	26553359	1686
ENSBTAT00000035789	BAG6	7.9285	1.24975e-16	9.7538e-17	2.40409e-15	23	27463438	27474655	3750
ENSBTAT00000006696	MED21	6.26367	1.27693e-16	9.97597e-17	2.45345e-15	5	83186276	83196046	758
ENSBTAT00000034204	NSD1	3.238	1.28524e-16	1.003e-16	2.46646e-15	7	39982435	40123961	8097
ENSBTAT00000055646	BRI3	9.5637	1.28781e-16	1.003e-16	2.46845e-15	25	38281392	38287463	524
ENSBTAT00000008382	NDUFAB1	10.2413	1.30094e-16	1.00837e-16	2.4877e-15	25	21498279	21509168	666
ENSBTAT00000033827	UBAC1	11.0044	1.29973e-16	1.00837e-16	2.4877e-15	11	103515902	103535051	1779
ENSBTAT00000053382	EPS15	5.85219	1.30882e-16	1.01372e-16	2.4998e-15	3	95389092	95528688	3395
ENSBTAT00000024825	HP1BP3	4.0919	1.31289e-16	1.01372e-16	2.5046e-15	2	132470750	132507576	3262
ENSBTAT00000026038	MRPL39	4.3355	1.3174e-16	1.02025e-16	2.51023e-15	1	10201965	10217710	1077
ENSBTAT00000053246	ERGIC3	5.07008	1.32502e-16	1.02193e-16	2.52177e-15	13	65435895	65448951	976
ENSBTAT00000005542	SCYE1	8.32432	1.32693e-16	1.02193e-16	2.52241e-15	6	20111150	20138597	1086
ENSBTAT00000005730	CS	10.7747	1.32987e-16	1.02193e-16	2.52502e-15	5	57366008	57389596	2944
ENSBTAT00000005329	ZNF106	14.6052	1.33302e-16	1.02193e-16	2.52803e-15	10	37890185	37941980	5877
ENSBTAT00000021846	COMMD7	4.7749	1.33474e-16	1.02193e-16	2.52832e-15	13	62647738	62675887	1295
ENSBTAT00000008319	ATPIF1	19.2102	1.337e-16	1.02599e-16	2.52961e-15	2	125727885	125730128	453
ENSBTAT00000025926	SLC25A39	5.38979	1.33863e-16	1.02599e-16	2.52973e-15	19	44752354	44756897	1590
ENSBTAT00000063691	ENSBTAT00000063691	11.6633	1.34429e-16	1.02599e-16	2.53745e-15	12	69574459	69575727	1269
ENSBTAT00000002607	FAM96A	5.73133	1.34883e-16	1.03123e-16	2.54304e-15	10	45936706	45952110	869
ENSBTAT00000010231	MYOT	26.4196	1.35406e-16	1.03123e-16	2.54991e-15	7	50941047	50958425	2209
ENSBTAT00000008447	ATP5F1	13.2121	1.3662e-16	1.04407e-16	2.56977e-15	3	32003756	32020661	1145
ENSBTAT00000016778	UROD	5.074	1.37034e-16	1.04407e-16	2.57455e-15	3	101616935	101620220	1177
ENSBTAT00000024233	M6PR	4.35456	1.37627e-16	1.04802e-16	2.58267e-15	5	101439877	101452407	2421
ENSBTAT00000023001	KLC1	5.21992	1.38058e-16	1.04802e-16	2.58474e-15	21	69896140	69957173	2378
ENSBTAT00000054270	ENSBTAT00000054270	8.58243	1.38012e-16	1.04802e-16	2.58474e-15	22	57156996	57161484	1111
ENSBTAT00000042645	ARHGDIA	6.7751	1.38685e-16	1.05439e-16	2.59346e-15	19	51633694	51637708	1851
ENSBTAT00000014744	RTN4	16.4246	1.40001e-16	1.06074e-16	2.61503e-15	11	37575270	37611627	1674
ENSBTAT00000066335	ENSBTAT00000066335	6.18384	1.42891e-16	1.08222e-16	2.66591e-15	1	72476820	72477521	702	Uncharacterized protein [Source:UniProtKB/TrEMBL;Acc:G3N2H8]
ENSBTAT00000007028	ARPC3	6.11284	1.45142e-16	1.09482e-16	2.70166e-15	17	56573543	56584354	825
ENSBTAT00000033894	CHTOP	7.22596	1.45031e-16	1.09482e-16	2.70166e-15	3	16801898	16811320	2009
ENSBTAT00000004933	NGLY1	3.4684	1.46128e-16	1.10109e-16	2.71686e-15	27	39876196	39934374	2517
ENSBTAT00000012544	RPS2	20.3703	1.47726e-16	1.1136e-16	2.74341e-15	25	1520493	1522670	940
ENSBTAT00000007481	TMED10	7.08617	1.4804e-16	1.1136e-16	2.74608e-15	10	86770121	86802293	1322
ENSBTAT00000016326	SPAG9	4.41569	1.50082e-16	1.12735e-16	2.78075e-15	19	36343607	36422982	4244
ENSBTAT00000009889	UBE2Q1	5.83444	1.51264e-16	1.13226e-16	2.7966e-15	3	16080089	16088325	1646
ENSBTAT00000044290	KIAA0368	10.3014	1.51285e-16	1.13226e-16	2.7966e-15	8	102504818	102589796	5685
ENSBTAT00000064660	ENSBTAT00000064660	3.95258	1.5691e-16	1.17321e-16	2.89725e-15	5	37326839	37328199	1361
ENSBTAT00000035255	ETF1	6.65857	1.57218e-16	1.17321e-16	2.89963e-15	7	51470294	51498199	2271
ENSBTAT00000022232	NPEPL1	6.61798	1.57453e-16	1.17321e-16	2.90063e-15	13	58207245	58222951	1863
ENSBTAT00000002434	PCYT2	2.99643	1.59409e-16	1.1868e-16	2.93331e-15	19	51592128	51599282	1833
ENSBTAT00000061002	PTPRM	5.22626	1.60063e-16	1.1929e-16	2.94198e-15	24	40768713	41437121	4861
ENSBTAT00000021840	ENSBTAT00000021840	6.97706	1.60969e-16	1.19762e-16	2.95526e-15	9	101442938	101443961	1024
ENSBTAT00000019767	COPB2	4.82786	1.61223e-16	1.19762e-16	2.95655e-15	1	130765733	130820131	2310
ENSBTAT00000030181	FAM50A	2.77617	1.62055e-16	1.20232e-16	2.96844e-15	X	40417745	40423500	1504
ENSBTAT00000025728	GPS1	5.62955	1.62417e-16	1.20232e-16	2.97168e-15	19	51422926	51427197	1823
ENSBTAT00000010108	PSMB1	9.31675	1.63135e-16	1.207e-16	2.98143e-15	9	105655749	105673470	866
ENSBTAT00000003145	PSMD12	6.41827	1.63446e-16	1.207e-16	2.98373e-15	19	50114345	50134716	1789
ENSBTAT00000008580	NSFL1C	6.75233	1.64678e-16	1.21905e-16	3.00281e-15	13	60244889	60265244	1328
ENSBTAT00000017770	RPS23	10.5108	1.64995e-16	1.21905e-16	3.00518e-15	7	84523780	84525639	618
ENSBTAT00000015199	ENSBTAT00000015199	5.98495	1.65914e-16	1.22505e-16	3.01851e-15	19	39460692	39564822	4087
ENSBTAT00000024262	NFIX	8.56366	1.67411e-16	1.23104e-16	3.04231e-15	7	13596367	13658112	1627
ENSBTAT00000000027	RAB6C	5.34613	1.69024e-16	1.24438e-16	3.06815e-15	15	53936927	54027857	3991
ENSBTAT00000005983	CAPZB	8.79773	1.73184e-16	1.26954e-16	3.13661e-15	2	133789485	133926170	1363
ENSBTAT00000007959	TSN	5.41081	1.73135e-16	1.26954e-16	3.13661e-15	2	73827082	73833492	986
ENSBTAT00000000010	BMSC-UBP	4.52669	1.73415e-16	1.26954e-16	3.13726e-15	21	34601365	34614703	1348
ENSBTAT00000046260	PRPF8	5.65953	1.73762e-16	1.27544e-16	3.13999e-15	19	23324762	23357323	7398
ENSBTAT00000061351	HECTD1	6.68488	1.75248e-16	1.28133e-16	3.16331e-15	21	42121456	42196305	7942
ENSBTAT00000022422	SAR1A	5.15902	1.77342e-16	1.29453e-16	3.19751e-15	28	26542608	26553908	758
ENSBTAT00000009405	CUEDC1	7.4468	1.7816e-16	1.30038e-16	3.20867e-15	19	8900990	8974286	2890
ENSBTAT00000003353	DCP1B	2.14323	1.78697e-16	1.30623e-16	3.21475e-15	5	108814604	108857086	1899
ENSBTAT00000006718	TMEM30A	4.36928	1.8054e-16	1.31935e-16	3.24428e-15	9	15058058	15102252	1672
ENSBTAT00000061582	MYOM1	13.4415	1.83056e-16	1.33244e-16	3.28583e-15	24	37673546	37791756	5838
ENSBTAT00000002419	COQ9	8.66885	1.84135e-16	1.33823e-16	3.30152e-15	18	25525200	25537104	1603
ENSBTAT00000010806	NPTN	6.71953	1.84736e-16	1.34401e-16	3.3086e-15	10	20207483	20270508	971
ENSBTAT00000061515	EIF3A	6.4236	1.86282e-16	1.34977e-16	3.33259e-15	26	39585658	39616179	4276
ENSBTAT00000032251	TOMM40	4.59227	1.88393e-16	1.36277e-16	3.36661e-15	18	53021418	53032792	1652
ENSBTAT00000016085	GPBP1	4.86281	1.91854e-16	1.39022e-16	3.42466e-15	20	22033857	22098038	2833
ENSBTAT00000065813	ENSBTAT00000065813	5.86437	1.92938e-16	1.39591e-16	3.4402e-15	6	35008595	35010340	1746
ENSBTAT00000009064	EPRS	4.62446	1.94025e-16	1.40159e-16	3.45576e-15	16	24171351	24236353	4619
ENSBTAT00000018109	TIMM13	5.79357	1.96455e-16	1.41448e-16	3.49517e-15	7	22448900	22450073	912
ENSBTAT00000009803	RPL10	13.7435	1.98487e-16	1.42734e-16	3.52741e-15	X	40364802	40367164	718
ENSBTAT00000024956	MTCH2	4.35475	2.01029e-16	1.44736e-16	3.56865e-15	15	78613666	78633634	2452
ENSBTAT00000035139	EMC6	7.2414	2.02384e-16	1.45296e-16	3.58874e-15	19	24977284	24978133	663
ENSBTAT00000048747	ABCE1	5.19683	2.03522e-16	1.46412e-16	3.60496e-15	17	13333870	13364710	2391
ENSBTAT00000006646	ARAF	7.15122	2.03818e-16	1.46412e-16	3.60623e-15	X	91180863	91191308	2368
ENSBTAT00000063377	ISCA1	9.8231	2.06347e-16	1.47686e-16	3.64697e-15	8	80824529	80836135	815
ENSBTAT00000003131	TSPAN3	8.55944	2.08252e-16	1.48956e-16	3.6766e-15	21	32706742	32719331	901
ENSBTAT00000037140	BUD31	6.5706	2.089e-16	1.49508e-16	3.68402e-15	25	37524461	37532400	717
ENSBTAT00000011377	MAP2K2	9.00447	2.11864e-16	1.51488e-16	3.73219e-15	7	21132389	21153974	1607
ENSBTAT00000009107	MRPS18B	5.04305	2.15547e-16	1.54009e-16	3.79291e-15	23	28169926	28176489	1069
ENSBTAT00000000397	ITCH	2.15829	2.16172e-16	1.54009e-16	3.79976e-15	13	64357862	64462219	5205
ENSBTAT00000019929	SEC61G	11.1984	2.1838e-16	1.55266e-16	3.83439e-15	22	1445067	1451951	414
ENSBTAT00000007194	CCAR2	4.64655	2.19184e-16	1.55808e-16	3.84432e-15	8	70414190	70429165	3647
ENSBTAT00000021517	FLII	8.9679	2.20143e-16	1.56179e-16	3.85556e-15	19	34989027	35000650	4010
ENSBTAT00000022847	ENSBTAT00000022847	6.45433	2.20304e-16	1.56179e-16	3.85556e-15	13	44229670	44230470	801	Bos taurus uncharacterized LOC515358 (LOC515358), mRNA. [Source:RefSeq mRNA;Acc:NM_11368]
ENSBTAT00000004604	KEAP1	7.83086	2.21064e-16	1.56379e-16	3.85929e-15	7	16235815	16244046	2542
ENSBTAT00000030958	FAM120A	3.95038	2.21186e-16	1.56379e-16	3.85929e-15	8	86200482	86316789	3429
ENSBTAT00000038517	ENSBTAT00000038517	10.6652	2.21236e-16	1.56379e-16	3.85929e-15	3	63013693	63014043	351	Uncharacterized protein [Source:UniProtKB/TrEMBL;Acc:E1B8C6]
ENSBTAT00000011696	MAPRE3	8.75555	2.22595e-16	1.57624e-16	3.8788e-15	11	72598140	72653468	1821
ENSBTAT00000013871	ENSBTAT00000013871	9.61396	2.2426e-16	1.5816e-16	3.90357e-15	28	3323730	3333934	714	Bos taurus egl nine homolog 1 (C. elegans) (EGLN1), mRNA. [Source:RefSeq mRNA;Acc:NM_12646]
ENSBTAT00000012797	MYH2	29.2346	2.2517e-16	1.58523e-16	3.91514e-15	19	30137767	30165109	6096
ENSBTAT00000024887	MYST2	3.5933	2.2541e-16	1.58523e-16	3.91514e-15	19	37444870	37479632	3492
ENSBTAT00000008203	CASC3	4.20471	2.28353e-16	1.60463e-16	3.96198e-15	19	41084252	41106062	3900
ENSBTAT00000011353	EXOC3	3.9529	2.30389e-16	1.61697e-16	3.99299e-15	20	71765789	71790498	2703
ENSBTAT00000027991	KHSRP	4.60311	2.31178e-16	1.62225e-16	4.00236e-15	7	19259132	19269635	2127
ENSBTAT00000016057	TCF25	5.36317	2.32311e-16	1.62752e-16	4.01765e-15	18	14741937	14753901	1839
ENSBTAT00000022033	GOLGA4	7.68188	2.33571e-16	1.63979e-16	4.03511e-15	22	10813998	10923960	7374
ENSBTAT00000001465	MRPS14	6.33987	2.35471e-16	1.64504e-16	4.06359e-15	16	57711734	57731147	622
ENSBTAT00000011976	ATG3	3.61644	2.3575e-16	1.6485e-16	4.06403e-15	1	57752209	57786798	1527
ENSBTAT00000022054	HNRNPR	4.90364	2.36413e-16	1.6485e-16	4.07111e-15	2	130103590	130132649	2571
ENSBTAT00000003990	PSMB7	9.29866	2.37475e-16	1.65195e-16	4.08066e-15	11	95401692	95458914	933
ENSBTAT00000021734	MGEA5	5.84289	2.37269e-16	1.65195e-16	4.08066e-15	26	22390930	22417746	3087
ENSBTAT00000003725	COPS6	6.86256	2.37988e-16	1.65716e-16	4.08512e-15	25	36893605	36896370	1110
ENSBTAT00000035335	COL4A1	13.4787	2.39469e-16	1.66235e-16	4.10616e-15	12	88876125	89009422	5770
ENSBTAT00000064934	ENSBTAT00000064934	8.15061	2.41651e-16	1.68142e-16	4.13917e-15	9	96791121	96791565	445
ENSBTAT00000007693	VTA1	4.03611	2.42856e-16	1.68479e-16	4.1554e-15	9	80663640	80734347	2151
ENSBTAT00000015985	CARM1	8.90835	2.43448e-16	1.68479e-16	4.16109e-15	7	16571430	16587354	1760
ENSBTAT00000016994	TRIAP1	6.52634	2.45917e-16	1.70378e-16	4.19884e-15	17	64998266	65000579	1185
ENSBTAT00000024699	YTHDF3	4.44578	2.46621e-16	1.70708e-16	4.20641e-15	14	29830349	29863766	5088
ENSBTAT00000010351	STAT1	5.40449	2.47113e-16	1.70708e-16	4.21034e-15	2	79888206	79927096	3537
ENSBTAT00000013288	FLOT2	7.09405	2.47651e-16	1.71037e-16	4.21504e-15	19	20811180	20815216	1173
ENSBTAT00000022098	NEK9	4.28152	2.48266e-16	1.71037e-16	4.22105e-15	10	86727710	86762452	3152
ENSBTAT00000037101	GET4	5.96733	2.49081e-16	1.71546e-16	4.23043e-15	25	42380410	42388252	834
ENSBTAT00000036888	ACTB	16.2853	2.50198e-16	1.72053e-16	4.24493e-15	25	39343633	39347044	1830
ENSBTAT00000013781	AKAP8L	3.99482	2.51575e-16	1.73247e-16	4.26379e-15	7	8754284	8787049	2006
ENSBTAT00000001172	KATNA1	3.67099	2.54103e-16	1.74438e-16	4.30212e-15	9	87965071	87999503	1912
ENSBTAT00000018505	ATP5C1	13.9494	2.54541e-16	1.74575e-16	4.30501e-15	13	16171111	16187450	1092
ENSBTAT00000006307	NTAN1	6.69996	2.55207e-16	1.74575e-16	4.3091e-15	25	13809385	13823824	1011
ENSBTAT00000052103	AHNAK	10.5005	2.55319e-16	1.74575e-16	4.3091e-15	29	41576805	41605018	16789
ENSBTAT00000000301	STAU1	4.71978	2.55728e-16	1.74893e-16	4.31149e-15	13	77962041	78003899	2097
ENSBTAT00000037984	SFRS4	4.75942	2.56492e-16	1.74893e-16	4.31985e-15	2	124956594	124982238	2269
ENSBTAT00000029121	LASS5	2.7777	2.57435e-16	1.75392e-16	4.33121e-15	5	29905581	29935323	2091
ENSBTAT00000003192	TUBA4A	20.6047	2.59531e-16	1.7707e-16	4.35793e-15	2	107921714	107925511	1470
ENSBTAT00000013929	M-RIP	7.87646	2.59565e-16	1.7707e-16	4.35793e-15	19	35557245	35646258	3918
ENSBTAT00000002573	DAZAP2	6.89734	2.61271e-16	1.77196e-16	4.37258e-15	5	28710053	28714259	1855
ENSBTAT00000006312	PHKB	9.97429	2.6105e-16	1.77196e-16	4.37258e-15	18	15962196	16155801	3437
ENSBTAT00000028902	FH	9.62057	2.61479e-16	1.77196e-16	4.37258e-15	16	36059726	36086821	1778
ENSBTAT00000046166	PSMD14	6.25245	2.61524e-16	1.77506e-16	4.37258e-15	2	35076260	35186366	1537
ENSBTAT00000036271	TECR	9.10441	2.61937e-16	1.77506e-16	4.37494e-15	7	12329820	12357348	1137
ENSBTAT00000020318	ARPC5L	5.42771	2.62754e-16	1.77815e-16	4.38046e-15	11	95859894	95867086	1027
ENSBTAT00000022854	PDIA3	8.13824	2.62811e-16	1.77815e-16	4.38046e-15	21	55924230	55946434	1935
ENSBTAT00000000109	CERS2	3.57519	2.65904e-16	1.79657e-16	4.42742e-15	3	19835017	19843638	2061
ENSBTAT00000029468	CHCHD10	16.603	2.68051e-16	1.80821e-16	4.45857e-15	17	73206771	73208629	679
ENSBTAT00000007922	OGDH	10.2916	2.70634e-16	1.82468e-16	4.49689e-15	4	77458516	77512436	4061
ENSBTAT00000016409	MRPS23	5.95458	2.71259e-16	1.82468e-16	4.50262e-15	19	8886028	8891010	830
ENSBTAT00000003259	ATP5A1	14.9676	2.78203e-16	1.86988e-16	4.61313e-15	24	46300459	46309366	1912
ENSBTAT00000006908	RNF14	4.75854	2.78785e-16	1.87275e-16	4.61803e-15	7	54717280	54735688	3076
ENSBTAT00000007660	SPOP	2.91492	2.79289e-16	1.87275e-16	4.62162e-15	19	37570928	37653473	2509
ENSBTAT00000004159	FNTA	4.73287	2.81546e-16	1.88901e-16	4.65418e-15	27	37391496	37415386	1645
ENSBTAT00000011559	ENSBTAT00000011559	6.70154	2.82462e-16	1.88901e-16	4.66454e-15	7	18289395	18329947	2530	Bos taurus heterogeneous nuclear ribonucleoprotein M (HNRNPM), mRNA. [Source:RefSeq mRNA;Acc:NM_1191223]
ENSBTAT00000061457	IARS2	7.10543	2.82863e-16	1.89183e-16	4.66636e-15	16	24285717	24329372	3115
ENSBTAT00000003073	NUCB1	6.36196	2.83338e-16	1.89183e-16	4.66707e-15	18	55939560	55955606	2214
ENSBTAT00000005789	NUDC	6.35586	2.84002e-16	1.8927e-16	4.66707e-15	2	126860368	126873806	1322
ENSBTAT00000015043	SLTM	3.75584	2.84065e-16	1.8927e-16	4.66707e-15	10	51410207	51453823	4062
ENSBTAT00000047860	RAB3GAP2	2.84405	2.83501e-16	1.8927e-16	4.66707e-15	16	24330707	24433700	5885
ENSBTAT00000013207	DNAJA3	4.36249	2.85679e-16	1.90408e-16	4.68881e-15	25	3569974	3601212	2453
ENSBTAT00000053788	SIAH1	3.19974	2.90955e-16	1.9354e-16	4.77053e-15	18	16836726	16841714	2509
ENSBTAT00000014704	BRD2	7.19469	2.93182e-16	1.94672e-16	4.80216e-15	23	7240060	7247225	2412
ENSBTAT00000016957	NDUFB3	10.3252	2.94573e-16	1.95603e-16	4.82004e-15	2	90077970	90088465	472
ENSBTAT00000010569	LMAN2	5.85792	2.94943e-16	1.95603e-16	4.8212e-15	7	40185729	40206355	1610
ENSBTAT00000026518	VPS25	6.23946	2.95722e-16	1.96067e-16	4.82902e-15	19	43446967	43451724	1083
ENSBTAT00000048084	LAMTOR2	6.84796	2.98086e-16	1.97192e-16	4.8627e-15	3	14763800	14766875	575
ENSBTAT00000006231	SPCS1	6.86252	3.00205e-16	1.98314e-16	4.8923e-15	22	48710805	48712454	804
ENSBTAT00000018339	ENSBTAT00000018339	21.4123	3.01589e-16	1.99434e-16	4.90989e-15	2	107981292	107982291	1000
ENSBTAT00000064237	PABPC1	7.73575	3.05423e-16	2.01212e-16	4.9673e-15	14	65816006	65833756	2849
ENSBTAT00000016378	RPL26	11.6539	3.1108e-16	2.04963e-16	5.05419e-15	19	28590314	28595213	509
ENSBTAT00000029144	COBRA1	3.29732	3.28699e-16	2.16607e-16	5.33506e-15	11	105843377	105850401	1773
ENSBTAT00000000049	MYADML2	4.23785	3.29702e-16	2.16611e-16	5.33734e-15	19	51562314	51565450	3137
ENSBTAT00000035554	AHSA1	10.2757	3.29623e-16	2.16611e-16	5.33734e-15	10	89715736	89723188	1324
ENSBTAT00000046359	TMBIM6	13.8062	3.29834e-16	2.16611e-16	5.33734e-15	5	30281520	30298109	2775
ENSBTAT00000000714	TOB1	11.9885	3.32592e-16	2.1727e-16	5.35507e-15	19	36512064	36515184	1461
ENSBTAT00000012183	DPY30	6.95416	3.32588e-16	2.1727e-16	5.35507e-15	11	14683785	14696398	613
ENSBTAT00000029620	ATXN2	2.67622	3.31909e-16	2.1727e-16	5.35507e-15	17	57425985	57527920	4248
ENSBTAT00000050399	DDX3X	10.363	3.32564e-16	2.1727e-16	5.35507e-15	X	107678777	107691829	2526
ENSBTAT00000054342	GNA11	3.95007	3.31273e-16	2.17049e-16	5.35507e-15	7	21937788	21953374	1260
ENSBTAT00000002345	C19orf70	9.33371	3.33318e-16	2.1727e-16	5.3614e-15	7	19841557	19843106	477
ENSBTAT00000003429	DYNC1I2	4.24076	3.34409e-16	2.17271e-16	5.36215e-15	2	24807357	24860776	1946
ENSBTAT00000003764	KPNA6	5.45249	3.3411e-16	2.17271e-16	5.36215e-15	1	130554555	130643416	2144
ENSBTAT00000024618	TIMM17B	6.35263	3.34697e-16	2.17705e-16	5.36215e-15	X	92088348	92092138	801
ENSBTAT00000049560	ATXN7L3B	4.79549	3.34136e-16	2.17271e-16	5.36215e-15	5	4048888	4052625	3738
ENSBTAT00000001113	PARP1	3.72941	3.36637e-16	2.18787e-16	5.38786e-15	16	30119202	30160574	3586
ENSBTAT00000028262	UBR5	2.71605	3.42108e-16	2.21812e-16	5.46999e-15	14	64169832	64308334	10466
ENSBTAT00000001253	RAB2A	7.79631	3.45897e-16	2.23962e-16	5.51962e-15	14	27864735	27937015	1691
ENSBTAT00000036123	DNM2	5.18269	3.45798e-16	2.23962e-16	5.51962e-15	7	16465942	16523297	3270
ENSBTAT00000046840	EFHA1	4.73235	3.46517e-16	2.24387e-16	5.52402e-15	12	35710543	35769962	1807
ENSBTAT00000018457	LARP4B	3.85105	3.49662e-16	2.26103e-16	5.56865e-15	13	46779271	46834689	2193
ENSBTAT00000036467	IL11RA	3.00724	3.52094e-16	2.26946e-16	5.59631e-15	8	77361667	77368154	1650
ENSBTAT00000044414	RNF220	5.74955	3.51964e-16	2.26946e-16	5.59631e-15	3	101957666	101977069	1751
ENSBTAT00000037527	SRRM2	6.86183	3.53998e-16	2.2801e-16	5.62103e-15	25	2286717	2304536	8395
ENSBTAT00000010022	CATD	10.7915	3.55464e-16	2.28173e-16	5.63068e-15	29	50352064	50361497	1986
ENSBTAT00000019719	ANXA6	8.33144	3.55655e-16	2.28173e-16	5.63068e-15	7	64359563	64406299	2480
ENSBTAT00000034200	WDR26	5.42921	3.55335e-16	2.28173e-16	5.63068e-15	16	28258333	28291746	2243
ENSBTAT00000056716	ITGB1	8.49265	3.56193e-16	2.28173e-16	5.63068e-15	13	20248945	20292114	3678
ENSBTAT00000061385	MTUS1	8.23709	3.56354e-16	2.28173e-16	5.63068e-15	27	18574170	18698056	4181
ENSBTAT00000010856	SNRPN	6.94093	3.58065e-16	2.2923e-16	5.65215e-15	21	2566	25936	1308
CUFF.12365.2	LOC786966	7.52984	3.59845e-16	2.3006e-16	5.6747e-15	14	2059962	2088002	13384
ENSBTAT00000043382	GLTSCR2	4.97351	3.60313e-16	2.3006e-16	5.67651e-15	18	55089143	55097794	1516
ENSBTAT00000027067	G3BP	6.02842	3.63137e-16	2.3175e-16	5.71542e-15	7	64976048	65004834	1791
ENSBTAT00000009044	EIF4B	10.7697	3.65721e-16	2.3321e-16	5.74531e-15	5	27091609	27115819	1994
ENSBTAT00000020770	ERAL1	2.81329	3.6575e-16	2.3321e-16	5.74531e-15	19	20792195	20796711	1811
ENSBTAT00000024791	SAP18	6.46088	3.70768e-16	2.36165e-16	5.81846e-15	12	35860636	35868470	2099
ENSBTAT00000014505	USP47	7.74905	3.72158e-16	2.36571e-16	5.83458e-15	15	41298533	41373143	4512
ENSBTAT00000024919	PLEKHM2	8.11193	3.72843e-16	2.36976e-16	5.83964e-15	16	53075569	53115375	3868
ENSBTAT00000022777	CDC37L1	5.25851	3.74322e-16	2.37381e-16	5.8571e-15	8	40073251	40092028	1116
ENSBTAT00000020243	CA3	28.5615	3.76409e-16	2.38418e-16	5.88404e-15	14	79406494	79416487	1671
ENSBTAT00000022876	C21H15orf63	10.9699	3.77129e-16	2.38589e-16	5.88756e-15	21	55974568	55975823	454
ENSBTAT00000025510	INPPL1	5.15765	3.77365e-16	2.38589e-16	5.88756e-15	15	52609012	52623088	4754
ENSBTAT00000013888	GPS2	7.83074	3.80232e-16	2.40255e-16	5.92654e-15	19	27653444	27656067	1172
ENSBTAT00000035753	UBL3	4.1626	3.82399e-16	2.41286e-16	5.95455e-15	12	30868719	30881788	3204
ENSBTAT00000028851	ENSBTAT00000028851	9.49965	3.88749e-16	2.4547e-16	6.04758e-15	3	14353658	14354168	511	Uncharacterized protein [Source:UniProtKB/TrEMBL;Acc:E1BE42]
ENSBTAT00000006139	WARS	4.71758	3.91224e-16	2.46494e-16	6.08021e-15	21	66888332	66916535	2658
ENSBTAT00000002103	ENSBTAT00000002103	9.94119	3.93378e-16	2.47516e-16	6.10779e-15	7	2586101	2598115	4575	Uncharacterized protein [Source:UniProtKB/TrEMBL;Acc:F1N5X6]
ENSBTAT00000014724	ENSBTAT00000014724	4.6406	3.98698e-16	2.51053e-16	6.18443e-15	24	18145197	18146402	1206
ENSBTAT00000015290	RABEP1	4.43146	4.00835e-16	2.52068e-16	6.2116e-15	19	26759902	26870523	5361
ENSBTAT00000028884	PJA2	3.38521	4.03353e-16	2.53082e-16	6.2446e-15	7	111045732	111095494	2574
ENSBTAT00000034976	ALKBH5	8.4562	4.05096e-16	2.53606e-16	6.25355e-15	19	35025249	35041293	1464
ENSBTAT00000048374	NAA15	4.41581	4.05043e-16	2.53606e-16	6.25355e-15	17	18613425	18687720	5643
ENSBTAT00000057162	RPN2	5.47244	4.05047e-16	2.53606e-16	6.25355e-15	13	66799465	66853779	2231
ENSBTAT00000029844	PLRG1	3.73179	4.06759e-16	2.54371e-16	6.27321e-15	17	2894754	2912624	2048
ENSBTAT00000012845	PDRG1	5.26186	4.07399e-16	2.54371e-16	6.27706e-15	13	62007731	62014961	1994
ENSBTAT00000045136	CAPZA1	4.54356	4.14724e-16	2.59123e-16	6.38382e-15	3	30810109	30854190	2299
CUFF.49912.1	UBE2A	3.8327	4.18736e-16	2.60872e-16	6.43031e-15	X	3777147	3788316	1289
ENSBTAT00000033154	DYSF	6.162	4.18943e-16	2.60872e-16	6.43031e-15	11	12894979	13123270	7010
ENSBTAT00000047445	BABAM1	4.02951	4.18463e-16	2.60747e-16	6.43031e-15	7	5759377	5765211	1479
ENSBTAT00000032311	IST1	4.93563	4.19814e-16	2.61246e-16	6.43754e-15	18	39300561	39339579	2419
ENSBTAT00000064843	ENSBTAT00000064843	10.9344	4.22601e-16	2.62861e-16	6.47412e-15	22	52425504	52428832	3284	Uncharacterized protein [Source:UniProtKB/TrEMBL;Acc:G3MY44]
ENSBTAT00000025254	GARS	4.23207	4.27476e-16	2.65095e-16	6.54258e-15	4	66102956	66156434	2413
ENSBTAT00000054137	ANXA11	5.94313	4.2964e-16	2.66704e-16	6.56946e-15	28	35318690	35360793	2297
ENSBTAT00000025803	IGFBP7	13.3543	4.3219e-16	2.6769e-16	6.60217e-15	6	74071067	74150456	1122
ENSBTAT00000043792	MRPL3	5.21374	4.33251e-16	2.68055e-16	6.61189e-15	1	139880639	139937339	1353
ENSBTAT00000064624	ENSBTAT00000064624	21.9376	4.33647e-16	2.6842e-16	6.61189e-15	16	5201143	5201319	177
ENSBTAT00000004441	DDX24	3.92044	4.34852e-16	2.6853e-16	6.62206e-15	21	59256632	59275061	2887
ENSBTAT00000024047	WDR13	4.29446	4.35137e-16	2.6853e-16	6.62206e-15	X	91784376	91791382	1658
ENSBTAT00000001507	SRRT	3.24228	4.38387e-16	2.69617e-16	6.65172e-15	25	36306702	36320801	3058
ENSBTAT00000005496	DIABLO	4.47994	4.38056e-16	2.69617e-16	6.65172e-15	17	55400571	55418222	1412
ENSBTAT00000011166	CTBP1	6.24995	4.37591e-16	2.69617e-16	6.65172e-15	6	109256152	109271813	1391
ENSBTAT00000055065	RPL17	5.33107	4.38738e-16	2.69978e-16	6.65172e-15	24	49617411	49621972	625
ENSBTAT00000017425	STIM1	5.28526	4.40312e-16	2.70085e-16	6.66303e-15	15	51845122	52049569	4010
ENSBTAT00000026632	C29H11orf73	9.71006	4.39995e-16	2.70085e-16	6.66303e-15	29	9263218	9300511	938
ENSBTAT00000016877	HDAC1	3.48022	4.42653e-16	2.71671e-16	6.69217e-15	2	122055992	122087843	2007
ENSBTAT00000006383	PRDX6	8.98865	4.46968e-16	2.73354e-16	6.73842e-15	16	56389804	56399714	1667
ENSBTAT00000008518	AGL	12.2796	4.46546e-16	2.73354e-16	6.73842e-15	3	43504601	43585149	5270
ENSBTAT00000013818	MARK2	1.81913	4.46927e-16	2.73354e-16	6.73842e-15	29	42829261	42865910	2613
ENSBTAT00000002387	GID8	3.61488	4.50156e-16	2.74674e-16	6.77512e-15	13	54936109	54942283	1395
ENSBTAT00000007758	RBBP4	5.47057	4.50244e-16	2.74674e-16	6.77512e-15	2	121800923	121817395	2195
ENSBTAT00000009081	SMAD4	4.86566	4.52183e-16	2.75637e-16	6.79795e-15	24	50993949	51045661	3287
ENSBTAT00000007159	ZMAT2	6.73344	4.61588e-16	2.81473e-16	6.93286e-15	7	53508799	53513894	1509
ENSBTAT00000008406	THAP11	5.77235	4.64092e-16	2.82165e-16	6.95749e-15	18	35472716	35474389	1674
ENSBTAT00000020018	NDUFA2	8.76975	4.63879e-16	2.82165e-16	6.95749e-15	7	53461635	53463955	550
ENSBTAT00000031581	UBE2V2	5.22645	4.67483e-16	2.83725e-16	7.00181e-15	14	21225303	21245522	1176
ENSBTAT00000002846	ENSBTAT00000002846	9.47561	4.68228e-16	2.84068e-16	7.00645e-15	2	122169405	122170058	654	Ribosomal protein [Source:UniProtKB/TrEMBL;Acc:E1BKD]
ENSBTAT00000023619	SMC1A	2.69136	4.70353e-16	2.85017e-16	7.03171e-15	X	96218220	96252806	3701
ENSBTAT00000024009	CNOT7	4.78531	4.71788e-16	2.85965e-16	7.04662e-15	27	19052444	19067489	2625
ENSBTAT00000010788	SEPW1	15.8046	4.78872e-16	2.89937e-16	7.1458e-15	18	55112228	55116590	956
ENSBTAT00000015948	SLC29A2	7.16599	4.84467e-16	2.92692e-16	7.2226e-15	29	45056314	45063665	1783
ENSBTAT00000010857	YIPF4	5.15759	4.85148e-16	2.93025e-16	7.22606e-15	11	14919596	14937163	942
ENSBTAT00000043635	RTN2	7.72545	4.87007e-16	2.93962e-16	7.24705e-15	18	53514400	53522925	2050
ENSBTAT00000037574	USP15	3.92494	4.87826e-16	2.94293e-16	7.25253e-15	5	51380096	51510100	2918
ENSBTAT00000021068	PHKA1	11.5903	4.9487e-16	2.98239e-16	7.35046e-15	X	83004459	83217747	3769
ENSBTAT00000023273	MYPN	10.4523	5.0136e-16	3.01576e-16	7.43999e-15	28	24745815	24832856	4148
ENSBTAT00000045447	OGT	6.30134	5.02773e-16	3.02223e-16	7.45409e-15	X	84387999	84429228	4181
ENSBTAT00000011330	CAMTA2	5.64531	5.03812e-16	3.02546e-16	7.45576e-15	19	27054328	27067739	3732
ENSBTAT00000018478	ANAPC11	6.56453	5.0349e-16	3.02223e-16	7.45576e-15	19	51604152	51609338	862
ENSBTAT00000028602	CFL1	9.08699	5.04835e-16	3.02867e-16	7.46405e-15	29	44638896	44642280	1072
ENSBTAT00000008194	WDR83OS	8.25531	5.07251e-16	3.03788e-16	7.4929e-15	7	13940092	13953200	654
ENSBTAT00000029284	SUB1	5.76979	5.09438e-16	3.04707e-16	7.5183e-15	20	41122023	41143914	3359
ENSBTAT00000028825	MSRA	10.3861	5.1073e-16	3.05624e-16	7.53046e-15	8	8635550	9019576	1367
ENSBTAT00000021429	C22H3ORF10	5.5587	5.1641e-16	3.0805e-16	7.60029e-15	22	16769773	16777323	1119
ENSBTAT00000038151	TRIP12	5.68405	5.16134e-16	3.0805e-16	7.60029e-15	2	118622220	118729375	6320
ENSBTAT00000003401	MAP3K7	2.64823	5.17459e-16	3.08365e-16	7.60878e-15	9	60555709	60620133	3360
ENSBTAT00000066030	MEF2D	7.0497	5.244e-16	3.12255e-16	7.70379e-15	3	14380072	14413740	2628
ENSBTAT00000063089	ENSBTAT00000063089	11.6799	5.27575e-16	3.14352e-16	7.74338e-15	8	39981323	40111016	509	Uncharacterized protein [Source:UniProtKB/TrEMBL;Acc:G3MYV8]
ENSBTAT00000001045	PPP1R7	3.83793	5.32382e-16	3.16445e-16	7.80519e-15	3	120853355	120869389	1209
ENSBTAT00000013135	FLOT1	7.82271	5.32756e-16	3.16751e-16	7.80519e-15	23	28090029	28100113	2093
ENSBTAT00000001376	SF1	6.02845	5.34513e-16	3.17651e-16	7.82382e-15	29	43623210	43636775	3182
ENSBTAT00000016073	ATP6AP1	3.87347	5.35579e-16	3.17956e-16	7.8323e-15	X	40402701	40410481	2103
ENSBTAT00000028220	NRD1	6.30486	5.39106e-16	3.19445e-16	7.87673e-15	3	95041110	95122769	3197
ENSBTAT00000043544	SHISA4	16.0679	5.41515e-16	3.20351e-16	7.89759e-15	16	49618802	49620917	739
ENSBTAT00000057596	MGC166429	12.3646	5.41486e-16	3.2034e-16	7.89759e-15	7	2600732	2618482	3232
ENSBTAT00000028718	NOL7	7.21097	5.42224e-16	3.20351e-16	7.90077e-15	23	42795776	42800011	904
ENSBTAT00000018414	RPS27	12.5407	5.45415e-16	3.21833e-16	7.94008e-15	3	16505732	16507247	372
ENSBTAT00000016349	ZFAND6	11.3171	5.45913e-16	3.22132e-16	7.94015e-15	21	26543823	26591580	493
ENSBTAT00000027250	ETFB	8.94682	5.48077e-16	3.2302e-16	7.96443e-15	18	57795757	57808326	838
ENSBTAT00000012904	GTF2I	5.19201	5.49212e-16	3.23318e-16	7.97373e-15	25	33291440	33372706	3979
ENSBTAT00000010469	ARPC4	5.63434	5.51375e-16	3.24204e-16	7.99449e-15	22	16958695	16967839	889
ENSBTAT00000024812	ATP6V1B2	3.60816	5.51635e-16	3.245e-16	7.99449e-15	8	67798291	67824441	2846
ENSBTAT00000016836	TNIP1	6.23471	5.5792e-16	3.27732e-16	8.07829e-15	7	64295657	64339418	2550
ENSBTAT00000004878	PTGR2	4.95061	5.63185e-16	3.29773e-16	8.13563e-15	10	85645803	85666323	1236
ENSBTAT00000013251	POLR3D	4.05768	5.63264e-16	3.29773e-16	8.13563e-15	8	70060559	70066835	1925
ENSBTAT00000024634	ENSBTAT00000024634	7.42828	5.63396e-16	3.29773e-16	8.13563e-15	5	58013470	58014035	566	Uncharacterized protein [Source:UniProtKB/TrEMBL;Acc:F1MGV7]
ENSBTAT00000031029	AFG3L2	6.55403	5.64444e-16	3.29773e-16	8.13618e-15	24	43252927	43271906	2850
ENSBTAT00000047188	RNF170	4.09654	5.63983e-16	3.29773e-16	8.13618e-15	27	37246976	37271896	1102
ENSBTAT00000004526	C3H1orf123	6.36019	5.67173e-16	3.31231e-16	8.16821e-15	3	93583352	93590342	695
ENSBTAT00000026372	SYPL1	7.78139	5.68326e-16	3.31518e-16	8.1775e-15	4	47423619	47453580	2222
ENSBTAT00000005060	ZCCHC24	8.35696	5.70574e-16	3.32675e-16	8.20251e-15	28	35189622	35251005	1169
ENSBTAT00000025580	USP14	4.51243	5.7137e-16	3.32675e-16	8.20662e-15	24	35529296	35564664	2429
ENSBTAT00000012481	POLR2G	4.10219	5.72723e-16	3.32949e-16	8.20864e-15	29	41777028	41780288	782
ENSBTAT00000013197	EMC2	5.56256	5.73091e-16	3.32949e-16	8.20864e-15	14	58126043	58175903	1231
ENSBTAT00000020074	FBXO9	4.52411	5.7347e-16	3.32949e-16	8.20864e-15	23	25030303	25051787	2199
ENSBTAT00000040046	RPS25	12.0147	5.73549e-16	3.33233e-16	8.20864e-15	15	30115928	30117641	477
ENSBTAT00000033967	TOR1AIP1	3.82508	5.76981e-16	3.34663e-16	8.25043e-15	16	62533723	62577521	2011
ENSBTAT00000006689	MRPL49	4.90067	5.78058e-16	3.34663e-16	8.25423e-15	29	43992489	43996386	1719
ENSBTAT00000025144	ATP6V0B	4.29786	5.78273e-16	3.34663e-16	8.25423e-15	3	102670949	102674697	977
ENSBTAT00000008358	CCT3	8.2933	5.79693e-16	3.35524e-16	8.26718e-15	3	14538748	14553305	1939
ENSBTAT00000014813	PUM2	2.94919	5.81867e-16	3.36085e-16	8.2835e-15	11	78579476	78666984	3213
ENSBTAT00000035608	PHAX	3.34451	5.81731e-16	3.36085e-16	8.2835e-15	7	28555707	28568143	2538
ENSBTAT00000029282	SLAIN2	4.60465	5.89532e-16	3.40104e-16	8.38521e-15	6	68695298	68741224	1447
ENSBTAT00000012287	NDUFA5	10.5792	5.90382e-16	3.40104e-16	8.38988e-15	4	88657784	88673594	550
ENSBTAT00000020781	RASSF3	5.0446	5.91718e-16	3.40956e-16	8.40145e-15	5	49348494	49352530	447
ENSBTAT00000025979	MED4	4.22322	5.94438e-16	3.41806e-16	8.43263e-15	12	17973731	17988210	1326
ENSBTAT00000025307	HECTD3	2.91805	5.95698e-16	3.42354e-16	8.44308e-15	3	101623083	101631050	3185
ENSBTAT00000005375	GAMT	9.22074	5.96462e-16	3.42354e-16	8.44646e-15	7	45433859	45436865	949
ENSBTAT00000024749	HSPB6	22.7577	5.97451e-16	3.42627e-16	8.45304e-15	18	46654243	46656762	1400
ENSBTAT00000062993	PACS2	3.29398	6.00351e-16	3.44046e-16	8.48662e-15	21	71291846	71316837	2568
ENSBTAT00000035681	SMARCA2	4.36621	6.10736e-16	3.50046e-16	8.62585e-15	8	42652775	42830159	5626
ENSBTAT00000008304	NUDCD3	5.4737	6.12226e-16	3.50312e-16	8.63931e-15	4	77598538	77670087	2752
ENSBTAT00000066296	ZNF358	9.41971	6.16686e-16	3.52865e-16	8.69463e-15	7	17610091	17611773	1683
ENSBTAT00000065323	MLX	5.22571	6.18621e-16	3.53699e-16	8.71428e-15	19	43283855	43290953	1835
ENSBTAT00000009492	RNPEPL1	9.43825	6.25357e-16	3.56815e-16	8.80146e-15	3	120320961	120324657	1352
ENSBTAT00000004009	RWDD4A	5.64364	6.26938e-16	3.57332e-16	8.81067e-15	27	13404609	13412552	774
ENSBTAT00000054282	TAF6	2.73144	6.27106e-16	3.57332e-16	8.81067e-15	25	36874497	36881803	2279
ENSBTAT00000001668	HNRPC	6.32953	6.28672e-16	3.58159e-16	8.82497e-15	10	25936105	25980839	1351
ENSBTAT00000025094	HARS	2.55747	6.30175e-16	3.58416e-16	8.83837e-15	7	53487090	53500190	1909
ENSBTAT00000002986	RNF34	5.15399	6.33683e-16	3.60378e-16	8.87984e-15	17	56021830	56042534	1954
ENSBTAT00000002140	PHF1	3.23531	6.36143e-16	3.61201e-16	8.90655e-15	23	7528759	7534103	2187
ENSBTAT00000000800	PRCC	3.90709	6.41141e-16	3.6303e-16	8.95151e-15	3	14090127	14117838	2256
ENSBTAT00000005324	CAPZA2	11.3729	6.42301e-16	3.6303e-16	8.95151e-15	4	51781849	51836823	1583
ENSBTAT00000026292	COQ3	5.49031	6.41835e-16	3.6303e-16	8.95151e-15	9	51053688	51077746	1257
ENSBTAT00000027526	BSDC1	2.83552	6.40524e-16	3.6303e-16	8.95151e-15	2	122006937	122029837	2816
ENSBTAT00000061240	CUL5	5.13159	6.4269e-16	3.63281e-16	8.95151e-15	15	17857169	17983781	2729
ENSBTAT00000065600	ENSBTAT00000065600	7.45972	6.42487e-16	3.6303e-16	8.95151e-15	14	69160054	69161571	747	Uncharacterized protein [Source:UniProtKB/TrEMBL;Acc:G3MYE8]
ENSBTAT00000027078	AP2B1	4.31183	6.46402e-16	3.6466e-16	8.99544e-15	19	15026370	15076211	1924
ENSBTAT00000017427	C7H5ORF15	4.50129	6.50852e-16	3.67165e-16	9.04954e-15	7	47231929	47244897	2150
ENSBTAT00000025677	ENSBTAT00000025677	6.4158	6.52064e-16	3.67412e-16	9.05857e-15	11	84076854	84078206	1353
ENSBTAT00000025637	NFE2L2	6.04436	6.56385e-16	3.69347e-16	9.11073e-15	2	19659540	19692048	2407
ENSBTAT00000008616	COPB1	3.68218	6.63986e-16	3.7353e-16	9.2083e-15	15	38765050	38800769	3261
ENSBTAT00000019353	KBP	3.15074	6.65044e-16	3.7377e-16	9.21504e-15	28	25404676	25459344	2466
ENSBTAT00000044575	STX8	3.71909	6.68466e-16	3.75134e-16	9.2545e-15	19	29278757	29489242	858
ENSBTAT00000063094	PAK2	4.36423	6.69859e-16	3.75933e-16	9.26581e-15	1	71867089	71952257	1628
ENSBTAT00000024045	KIAA1715	5.41227	6.71633e-16	3.76732e-16	9.28236e-15	2	20941574	21011178	1479
ENSBTAT00000024209	NDUFC2	10.134	6.80271e-16	3.8089e-16	9.39369e-15	29	18074821	18083006	648
ENSBTAT00000014925	SEC11A	3.66047	6.81918e-16	3.81683e-16	9.40836e-15	21	22754375	22787431	1096
ENSBTAT00000029026	NDUFV1	12.1356	6.83506e-16	3.82474e-16	9.4222e-15	29	46108281	46114242	1514
ENSBTAT00000031972	SCHIP1	11.3882	6.91271e-16	3.86058e-16	9.52109e-15	1	108383680	108454122	1484
ENSBTAT00000047356	MOBKL1B	2.38189	6.95061e-16	3.87961e-16	9.56511e-15	11	10460094	10481561	1911
ENSBTAT00000014730	ERGIC2	4.56051	7.04674e-16	3.92872e-16	9.68912e-15	5	80616119	80659407	1644
ENSBTAT00000025437	EIF1B	5.83083	7.05402e-16	3.92872e-16	9.69084e-15	22	13214224	13216690	959
ENSBTAT00000046364	MFN2	6.94078	7.09056e-16	3.94764e-16	9.73275e-15	16	42561715	42581003	2598
ENSBTAT00000015648	ISCU	11.4679	7.13573e-16	3.96871e-16	9.78531e-15	17	66685452	66691553	981
ENSBTAT00000064544	ENSBTAT00000064544	11.1318	7.14101e-16	3.96871e-16	9.78531e-15	X	95330253	95330600	348	Uncharacterized protein [Source:UniProtKB/TrEMBL;Acc:G3NE2]
ENSBTAT00000015705	CCDC47	7.37404	7.15679e-16	3.97644e-16	9.79859e-15	19	48662435	48682292	1616
ENSBTAT00000010613	ERLEC1	3.4057	7.17502e-16	3.98416e-16	9.81521e-15	11	36371087	36395686	2070
ENSBTAT00000001490	CORO6	11.683	7.26427e-16	4.02513e-16	9.92886e-15	19	21426533	21434772	2597
ENSBTAT00000036142	RPS4Y1	5.22567	7.2818e-16	4.02938e-16	9.9387e-15	23	10528444	10544184	1056
ENSBTAT00000040082	BSG	12.3615	7.28382e-16	4.02938e-16	9.9387e-15	7	44816940	44823914	1474
ENSBTAT00000020778	SDF4	6.1061	7.3028e-16	4.03362e-16	9.94775e-15	16	52474085	52481382	899
ENSBTAT00000022642	USO1	5.35839	7.30068e-16	4.03362e-16	9.94775e-15	6	92297159	92378158	3980
ENSBTAT00000018391	TRIP10	7.00042	7.36547e-16	4.06885e-16	1.00246e-14	7	18960639	18964880	1070
ENSBTAT00000022686	ING4	3.81702	7.40171e-16	4.08196e-16	1.00655e-14	5	104145507	104152702	1361
ENSBTAT00000005172	ASH1L	2.46931	7.42516e-16	4.0916e-16	1.00803e-14	3	15176831	15353404	11263
ENSBTAT00000026452	OTUD4	3.30642	7.42386e-16	4.08954e-16	1.00803e-14	17	13286959	13327626	5347
ENSBTAT00000006040	CCDC124	6.01612	7.463e-16	4.10466e-16	1.01231e-14	7	5157901	5168539	954
ENSBTAT00000027310	C23H6ORF62	4.92416	7.47146e-16	4.1067e-16	1.01261e-14	23	32822610	32834752	2384
ENSBTAT00000026356	USP5	4.33208	7.493e-16	4.11423e-16	1.01467e-14	5	103946733	103960262	3258
ENSBTAT00000042668	RBX1	6.19535	7.55429e-16	4.14371e-16	1.02212e-14	5	112685001	112697359	798
ENSBTAT00000028490	BLMH	5.72622	7.6699e-16	4.20603e-16	1.03689e-14	19	21896194	21936565	1470
ENSBTAT00000015881	LAMC1	8.05052	7.70388e-16	4.21894e-16	1.04061e-14	16	65545497	65662819	5036
ENSBTAT00000023164	VAPB	4.83634	7.73313e-16	4.23183e-16	1.04368e-14	13	58463228	58510710	2257
ENSBTAT00000024107	PEBP1	12.4744	7.7749e-16	4.25017e-16	1.04844e-14	17	59333429	59337958	1402
ENSBTAT00000022415	RPS6KB1	3.16741	7.79951e-16	4.263e-16	1.05088e-14	19	11070901	11107334	1575
ENSBTAT00000010308	PIAS2	3.10397	7.81368e-16	4.2649e-16	1.05191e-14	24	46997481	47063075	2225
ENSBTAT00000000201	SP3	3.35662	7.85576e-16	4.28504e-16	1.05631e-14	2	22841314	22888725	2270
ENSBTAT00000018778	COX6C	13.363	7.85952e-16	4.28504e-16	1.05631e-14	14	66637801	66647721	465
ENSBTAT00000025941	GR-A	4.57943	7.92174e-16	4.31415e-16	1.06379e-14	7	56235966	56350171	2395
ENSBTAT00000010982	ATOX1	6.78752	8.03031e-16	4.37042e-16	1.07747e-14	7	64945749	64961110	441
ENSBTAT00000007423	GYS1	12.4126	8.06014e-16	4.37581e-16	1.07898e-14	18	55996079	56012727	3546
ENSBTAT00000021634	FKBP8	6.71092	8.05863e-16	4.37581e-16	1.07898e-14	7	4566171	4574944	1669
ENSBTAT00000049932	STAG1	1.84267	8.06172e-16	4.37581e-16	1.07898e-14	1	133678526	134028760	3849
ENSBTAT00000008383	TUBGCP2	5.14729	8.12076e-16	4.40472e-16	1.08598e-14	26	25944197	25958640	2863
ENSBTAT00000002970	SEL1L3	5.42472	8.16086e-16	4.41908e-16	1.08954e-14	6	46791165	46881531	3279
ENSBTAT00000003197	NDUFB5	10.7932	8.16077e-16	4.41908e-16	1.08954e-14	1	88096667	88111780	1119
ENSBTAT00000025243	YIPF3	4.47565	8.20698e-16	4.44248e-16	1.09479e-14	23	17031093	17035360	1466
ENSBTAT00000000014	TXN2	7.13193	8.24136e-16	4.45133e-16	1.09755e-14	5	75258029	75267776	1044
ENSBTAT00000026003	PPM1G	3.23427	8.23696e-16	4.45133e-16	1.09755e-14	11	72252676	72273095	2136
ENSBTAT00000002349	RPL36	7.25888	8.29137e-16	4.47095e-16	1.10239e-14	7	19833364	19834615	551
ENSBTAT00000014563	TMED1	3.78107	8.28728e-16	4.47095e-16	1.10239e-14	7	16524145	16527426	1500
ENSBTAT00000025031	SNF8	3.63124	8.3062e-16	4.47804e-16	1.10345e-14	19	38222250	38231186	2384
ENSBTAT00000008198	CBX5	4.97209	8.33009e-16	4.48142e-16	1.1048e-14	5	25944853	25971390	885
ENSBTAT00000030510	POLR2K	5.07562	8.32706e-16	4.48142e-16	1.1048e-14	14	23735755	23737474	1591
ENSBTAT00000025441	PNRC1	14.0356	8.39454e-16	4.50998e-16	1.11243e-14	9	61921605	61925635	1765
ENSBTAT00000002296	SENP2	3.52371	8.40573e-16	4.51702e-16	1.113e-14	1	82176394	82210749	2706
ENSBTAT00000018555	BCL2L13	10.0218	8.4451e-16	4.53477e-16	1.11729e-14	5	109584777	109635907	2318
ENSBTAT00000043035	SLIRP	11.4	8.62324e-16	4.61841e-16	1.13899e-14	10	89914334	89923167	378
ENSBTAT00000061441	MED1	2.38322	8.61924e-16	4.61841e-16	1.13899e-14	19	40495454	40516179	4838
ENSBTAT00000008754	ERP29	4.69511	8.71579e-16	4.66052e-16	1.14944e-14	17	64419027	64426503	1234
ENSBTAT00000023574	KIFAP3	2.36355	8.7238e-16	4.66052e-16	1.14944e-14	16	38360035	38502334	2913
ENSBTAT00000026826	RPL7	8.17801	8.71699e-16	4.66052e-16	1.14944e-14	14	38741347	38744856	1089
ENSBTAT00000026274	DAZAP1	3.70038	8.76147e-16	4.67807e-16	1.15346e-14	7	45450622	45462547	1195
ENSBTAT00000000805	ELAVL1	4.33846	8.82854e-16	4.7116e-16	1.16134e-14	7	17939663	17976489	2380
ENSBTAT00000007189	NDUFA9	10.5639	8.89305e-16	4.73974e-16	1.16843e-14	5	105870530	105892347	1261
ENSBTAT00000018147	NFE2L1	11.9549	8.89691e-16	4.7412e-16	1.16843e-14	19	39056971	39069122	5621
ENSBTAT00000023751	CAV1	12.1045	8.92581e-16	4.75331e-16	1.17127e-14	4	52173110	52208687	2453
ENSBTAT00000025624	CHRNB1	5.34586	9.04419e-16	4.80794e-16	1.18539e-14	19	27757183	27766382	2512
ENSBTAT00000063904	POLR2M	4.12282	9.04813e-16	4.80934e-16	1.18539e-14	10	52648527	52655730	1469
ENSBTAT00000004955	RQCD1	2.6064	9.05623e-16	4.81074e-16	1.18548e-14	2	107256013	107289222	3183
ENSBTAT00000000217	SLC25A20	6.4043	9.06749e-16	4.81214e-16	1.18599e-14	22	51617498	51652558	1803
ENSBTAT00000024135	ATF1	4.28008	9.1186e-16	4.83474e-16	1.19171e-14	5	29272372	29336696	2467
ENSBTAT00000002852	NDUFS2	14.2548	9.1881e-16	4.8679e-16	1.19982e-14	3	8309350	8318876	1577
ENSBTAT00000003974	ADRM1	7.42741	9.30777e-16	4.92747e-16	1.21446e-14	13	55433440	55439176	1408
ENSBTAT00000063725	ENSBTAT00000063725	4.2969	9.33627e-16	4.93934e-16	1.21719e-14	X	144159056	144234222	1427	Uncharacterized protein [Source:UniProtKB/TrEMBL;Acc:G3NA9]
ENSBTAT00000019176	ENSBTAT00000019176	10.4649	9.40732e-16	4.97233e-16	1.22546e-14	25	33157514	33168430	1541	Uncharacterized protein [Source:UniProtKB/TrEMBL;Acc:F1N38]
ENSBTAT00000065503	VPS4A	6.1444	9.42096e-16	4.97359e-16	1.22625e-14	18	36588546	36595360	2068
ENSBTAT00000012570	ATP2B1	5.8804	9.51068e-16	5.01019e-16	1.23556e-14	5	19539973	19669793	4417
ENSBTAT00000014994	TRMT1L	3.92819	9.51555e-16	5.01019e-16	1.23556e-14	16	67618111	67653844	3517
ENSBTAT00000024402	ATP5G1	15.6572	9.51121e-16	5.01019e-16	1.23556e-14	19	38253561	38255681	551
ENSBTAT00000003661	RNF185	3.67236	9.52361e-16	5.01019e-16	1.23561e-14	17	72108603	72138742	2988
ENSBTAT00000014152	DVL1	7.52305	9.55645e-16	5.01911e-16	1.23688e-14	16	52431328	52440427	1719
ENSBTAT00000014227	CDC2L1	3.26582	9.54666e-16	5.01789e-16	1.23688e-14	16	52240501	52260332	2916
ENSBTAT00000017897	TAB2	4.8101	9.55426e-16	5.01789e-16	1.23688e-14	9	87759388	87798966	2630
ENSBTAT00000061330	TAF2	2.7534	9.60888e-16	5.04131e-16	1.24267e-14	14	83552370	83639183	3609
ENSBTAT00000004952	AMFR	7.32246	9.64222e-16	5.04893e-16	1.24498e-14	18	24290808	24334739	2142
ENSBTAT00000005998	MBNL1	8.49695	9.63457e-16	5.04774e-16	1.24498e-14	1	116238831	116394390	1537
ENSBTAT00000024921	SLC25A34	9.76338	9.7063e-16	5.08152e-16	1.25225e-14	16	53069568	53074055	2659
ENSBTAT00000013943	KXD1	5.82165	9.74619e-16	5.09837e-16	1.25639e-14	7	4539084	4546548	1305
ENSBTAT00000016160	GNAQ	3.4282	9.85395e-16	5.14654e-16	1.26927e-14	8	53970972	54280697	1119
ENSBTAT00000025807	RAB21	7.09395	9.87611e-16	5.15809e-16	1.2711e-14	X	97425377	97426021	645
ENSBTAT00000005722	COQ10A	11.6246	9.93137e-16	5.18005e-16	1.2772e-14	5	57390328	57393708	1538
ENSBTAT00000037203	ENSBTAT00000037203	12.8992	9.9804e-16	5.20198e-16	1.28248e-14	14	68938073	68938543	471	Uncharacterized protein [Source:UniProtKB/TrEMBL;Acc:E1BII3]
ENSBTAT00000011940	FAR1	3.83285	9.99886e-16	5.20825e-16	1.28382e-14	15	39529628	39605792	2737
ENSBTAT00000018032	TSG101	3.11961	1.01881e-15	5.30395e-16	1.30708e-14	29	26450457	26492046	1434
ENSBTAT00000025183	QRICH1	3.16479	1.02288e-15	5.30395e-16	1.31126e-14	22	51492855	51535040	3260
ENSBTAT00000039021	ENSBTAT00000039021	9.50183	1.02799e-15	5.33895e-16	1.31676e-14	1	105171799	105172518	720	Ribosomal protein [Source:UniProtKB/TrEMBL;Acc:G3X7N2]
ENSBTAT00000025662	ATIC	6.37847	1.02921e-15	5.33895e-16	1.31728e-14	2	103847180	103870755	2042
ENSBTAT00000013623	MAPK1	5.82438	1.03288e-15	5.33895e-16	1.32092e-14	17	74016493	74035118	1167
ENSBTAT00000010907	ZBTB4	2.35674	1.03408e-15	5.33895e-16	1.32141e-14	19	27769639	27773345	3033
ENSBTAT00000063057	ENSBTAT00000063057	16.9833	1.04242e-15	5.38651e-16	1.33101e-14	29	272264	273010	747
ENSBTAT00000044550	RANBP3	4.3077	1.05037e-15	5.43399e-16	1.3401e-14	7	19640261	19691067	2863
ENSBTAT00000005380	ALAS1	7.46804	1.06141e-15	5.47707e-16	1.3531e-14	22	49242706	49256766	2255
ENSBTAT00000023671	RAB14	6.01206	1.0647e-15	5.47707e-16	1.35624e-14	8	112502334	112512347	670
ENSBTAT00000004701	PBDC1	5.01887	1.07293e-15	5.52437e-16	1.36563e-14	X	80576367	80580439	747
ENSBTAT00000004656	GSPT1	5.62823	1.08428e-15	5.56719e-16	1.37802e-14	25	10622209	10652097	3035
ENSBTAT00000034009	ENSBTAT00000034009	8.71621	1.08437e-15	5.56719e-16	1.37802e-14	3	16461061	16461606	546
ENSBTAT00000022290	BCDIN3	2.94772	1.08623e-15	5.60547e-16	1.37929e-14	25	36644930	36648339	1925
ENSBTAT00000021830	DUSP26	10.9669	1.08957e-15	5.60547e-16	1.38244e-14	27	28963365	28969954	1541
ENSBTAT00000022619	CMC2	7.38872	1.09162e-15	5.60547e-16	1.38395e-14	18	7719672	7733832	692
ENSBTAT00000022057	MRPL28	4.65051	1.09609e-15	5.63913e-16	1.38852e-14	25	361740	364295	1093
ENSBTAT00000016981	SRF	7.37141	1.09946e-15	5.63913e-16	1.39141e-14	23	16747958	16754754	1905
ENSBTAT00000020126	ARGLU1	7.28689	1.10009e-15	5.63913e-16	1.39141e-14	12	86311326	86323526	911
ENSBTAT00000019758	SPARC	19.8321	1.10237e-15	5.63913e-16	1.39319e-14	7	64878194	64900828	2138
ENSBTAT00000043690	KTN1	6.16628	1.10559e-15	5.68594e-16	1.39616e-14	10	68238010	68351879	4519
ENSBTAT00000010168	MEMO1	8.09016	1.11797e-15	5.72369e-16	1.40997e-14	11	14564175	14627388	848
ENSBTAT00000028747	BRD7	5.01257	1.11828e-15	5.72369e-16	1.40997e-14	18	18810541	18858142	2130
ENSBTAT00000004052	MTMR6	3.34369	1.12213e-15	5.72369e-16	1.41372e-14	12	34177965	34197920	3427
ENSBTAT00000001169	RB1CC1	4.56058	1.13069e-15	5.76577e-16	1.42339e-14	14	23147992	23177073	5897
ENSBTAT00000006992	GDI2	8.50878	1.13292e-15	5.76577e-16	1.42509e-14	13	43302440	43331090	2366
ENSBTAT00000020755	DCTN4	3.75756	1.13796e-15	5.80772e-16	1.43031e-14	7	64076578	64107651	1895
ENSBTAT00000054099	ENSBTAT00000054099	13.143	1.14367e-15	5.80772e-16	1.43637e-14	9	39398265	39398790	526	Uncharacterized protein [Source:UniProtKB/TrEMBL;Acc:E1BB71]
ENSBTAT00000008431	ACO2	14.926	1.15676e-15	5.89582e-16	1.45168e-14	5	113089139	113138185	2744
ENSBTAT00000006848	BAZ1B	2.85563	1.16202e-15	5.89582e-16	1.45715e-14	25	34185433	34241305	6222
ENSBTAT00000000956	FBXW2	2.58084	1.16463e-15	5.89582e-16	1.45927e-14	8	112057391	112089639	1891
ENSBTAT00000000718	KLHDC10	3.70839	1.16566e-15	5.94202e-16	1.45943e-14	4	94676716	94737325	1744
ENSBTAT00000002033	HNRNPA1	6.36345	1.17978e-15	5.9835e-16	1.47597e-14	5	25939737	25944246	1754
ENSBTAT00000015378	RFNG	7.96938	1.18371e-15	5.9835e-16	1.47972e-14	19	51429344	51431873	849
ENSBTAT00000024779	PCBP4	6.35341	1.18734e-15	6.02018e-16	1.48196e-14	22	49521552	49531507	1966
ENSBTAT00000028683	BFAR	2.6702	1.18653e-15	6.02018e-16	1.48196e-14	25	13640454	13672230	2677
ENSBTAT00000017114	DNLZ	4.58034	1.18914e-15	6.02018e-16	1.48307e-14	11	103874072	103875832	629
ENSBTAT00000004980	SCN1B	11.6047	1.19731e-15	6.0567e-16	1.4921e-14	18	45960622	45970522	1441
ENSBTAT00000061449	TTN	14.1881	1.20232e-15	6.0567e-16	1.49719e-14	2	18054943	18329808	103350
ENSBTAT00000024505	PSMF1	4.58909	1.20346e-15	6.0567e-16	1.49745e-14	13	60505462	60544959	1310
ENSBTAT00000039313	RTFDC1	3.3052	1.20747e-15	6.09775e-16	1.50127e-14	13	59983723	60027251	1456
ENSBTAT00000015465	U2AF1	6.93067	1.21137e-15	6.09775e-16	1.50495e-14	1	144832445	144845410	892
ENSBTAT00000001379	SNRPB	6.27493	1.21621e-15	6.13394e-16	1.50963e-14	13	53134613	53143629	1053
ENSBTAT00000005214	RPL7L1	5.71903	1.2174e-15	6.13394e-16	1.50963e-14	23	16520006	16524508	750
ENSBTAT00000046532	ENSBTAT00000046532	17.3635	1.21794e-15	6.13394e-16	1.50963e-14	6	323371	323914	544
ENSBTAT00000061210	VCL	8.61554	1.24037e-15	6.22492e-16	1.53625e-14	28	30053806	30166317	5392
ENSBTAT00000017658	PNPLA8	2.5271	1.24213e-15	6.22492e-16	1.53725e-14	4	49867702	49907595	2406
ENSBTAT00000025878	KIAA0232	4.19848	1.25185e-15	6.2703e-16	1.54808e-14	6	118129452	118178266	4490
ENSBTAT00000005181	UBP1	3.10884	1.25536e-15	6.30593e-16	1.55123e-14	22	7723060	7785327	1707
ENSBTAT00000001237	RABL6	5.32164	1.26042e-15	6.30593e-16	1.5551e-14	11	106344498	106363593	2723
ENSBTAT00000066020	ENSBTAT00000066020	9.52749	1.25994e-15	6.30593e-16	1.5551e-14	21	26597057	26600056	710	Uncharacterized protein [Source:UniProtKB/TrEMBL;Acc:G3N2F1]
ENSBTAT00000027226	MED29	4.47332	1.2663e-15	6.35111e-16	1.56116e-14	18	49351575	49355101	669
CUFF.20015.1	UNANNOTATED	10.246	1.28276e-15	6.39622e-16	1.58024e-14	19	1541150	1541824	675	Eukaryotic translation initiation factor 4B[Source:UniProtKB/TrEMBL;Acc:IF4B]
ENSBTAT00000055230	NSMCE1	6.183	1.28575e-15	6.43634e-16	1.58271e-14	25	25059384	25068747	803
ENSBTAT00000022024	SPSB3	4.47661	1.28804e-15	6.43634e-16	1.58432e-14	25	1354553	1360122	1517
ENSBTAT00000042916	DDX31	5.03579	1.29701e-15	6.46156e-16	1.59414e-14	11	102698014	102771662	2875
ENSBTAT00000002784	PPP4R2	3.74843	1.29926e-15	6.46156e-16	1.59447e-14	22	28775667	28823253	1286
ENSBTAT00000027941	CAT	10.1673	1.29835e-15	6.46156e-16	1.59447e-14	15	65779325	65815261	2262
ENSBTAT00000002491	RBM39	7.23452	1.30157e-15	6.46156e-16	1.59608e-14	13	65567208	65592912	1868
ENSBTAT00000039850	TMEM9B	7.3769	1.30293e-15	6.46156e-16	1.59653e-14	15	44215628	44234314	1926
ENSBTAT00000017002	DCUN1D1	7.76395	1.30657e-15	6.50136e-16	1.59978e-14	1	84656319	84689038	960
ENSBTAT00000011049	MRPL54	2.96033	1.30805e-15	6.50136e-16	1.60038e-14	7	21435492	21438615	1806
ENSBTAT00000046195	TMEM258	7.09163	1.33705e-15	6.6301e-16	1.63461e-14	29	40927662	40931388	452
ENSBTAT00000025997	COMT	6.43159	1.34031e-15	6.6301e-16	1.63611e-14	17	74927012	74927547	327
ENSBTAT00000029796	TBC1D9B	3.88282	1.34019e-15	6.6301e-16	1.63611e-14	7	1273635	1313897	4409
ENSBTAT00000011010	CTDSP1	4.64254	1.34277e-15	6.6301e-16	1.63787e-14	2	107130648	107135774	1596
ENSBTAT00000014195	MIB2	4.74408	1.35127e-15	6.66947e-16	1.647e-14	16	52264771	52276754	3228
ENSBTAT00000014754	COPS7A	3.8515	1.35354e-15	6.66947e-16	1.64851e-14	5	104080893	104087049	1812
ENSBTAT00000030541	MSL3	3.3614	1.36092e-15	6.7138e-16	1.65625e-14	X	142041442	142056938	2315
ENSBTAT00000014552	HINT1	7.26304	1.36534e-15	6.75805e-16	1.66037e-14	7	24515178	24521784	535
ENSBTAT00000002587	SNRNP70	5.34041	1.37643e-15	6.79712e-16	1.67259e-14	18	56058668	56073102	1645
ENSBTAT00000012184	ZNF638	3.69992	1.37936e-15	6.79712e-16	1.67489e-14	11	13155560	13235444	6155
ENSBTAT00000003484	BLZF1	4.4569	1.40807e-15	6.93442e-16	1.70846e-14	16	37838604	37860891	1568
ENSBTAT00000023487	EEF2K	7.99543	1.41106e-15	6.93442e-16	1.7108e-14	25	20115008	20165902	2692
ENSBTAT00000049486	SRSF1	6.19263	1.41655e-15	6.96786e-16	1.71616e-14	19	9038200	9041927	2752
ENSBTAT00000004408	SMARCA5	6.01967	1.42037e-15	6.96786e-16	1.71869e-14	17	14546193	14583767	3562
ENSBTAT00000011329	SPAG7	8.29168	1.42077e-15	6.96786e-16	1.71869e-14	19	27068573	27072718	983
ENSBTAT00000018279	CTCF	4.10619	1.42901e-15	6.9959e-16	1.72736e-14	18	35270360	35290823	3495
ENSBTAT00000033899	KIF5B	7.44366	1.43092e-15	6.9959e-16	1.72838e-14	13	33619259	33665129	4032
ENSBTAT00000003305	PTMA	8.64985	1.43576e-15	7.03429e-16	1.73032e-14	2	120227920	120232987	1197
ENSBTAT00000033632	CCM2	3.81597	1.43425e-15	6.9959e-16	1.73032e-14	4	77250091	77301198	2049
ENSBTAT00000065478	ENSBTAT00000065478	11.9271	1.43492e-15	6.9959e-16	1.73032e-14	29	43163337	43163913	189
ENSBTAT00000009379	ENSA	5.15483	1.43865e-15	7.03429e-16	1.73251e-14	3	20141694	20146997	2433
ENSBTAT00000018888	RPL35A	10.6018	1.44749e-15	7.07784e-16	1.74186e-14	1	70788697	70792140	445
ENSBTAT00000029669	TMED2	6.60063	1.46589e-15	7.15942e-16	1.76268e-14	17	54330421	54338333	606
ENSBTAT00000004630	ENSBTAT00000004630	8.68982	1.47027e-15	7.15942e-16	1.76531e-14	12	18173185	18173958	774	Uncharacterized protein [Source:UniProtKB/TrEMBL;Acc:E1BHY4]
ENSBTAT00000009607	RAD21	5.23504	1.4693e-15	7.15942e-16	1.76531e-14	14	49558483	49588327	3556
ENSBTAT00000014525	APOO	5.82023	1.47985e-15	7.19739e-16	1.77549e-14	X	126397965	126427158	879
ENSBTAT00000003801	ENSBTAT00000003801	8.65999	1.48173e-15	7.19739e-16	1.77642e-14	28	31044244	31048603	1014	Bos taurus dual specificity phosphatase 13 (DUSP13), mRNA. [Source:RefSeq mRNA;Acc:NM_1163944]
ENSBTAT00000019438	VAMP3	5.78558	1.48784e-15	7.22987e-16	1.78201e-14	16	46455183	46464710	2160
ENSBTAT00000021808	OPTN	13.6107	1.4886e-15	7.22987e-16	1.78201e-14	13	28078762	28117627	1914
ENSBTAT00000020148	S100A11	8.18941	1.49394e-15	7.22987e-16	1.78706e-14	3	18768796	18770416	620
ENSBTAT00000000100	NDUFB8	10.667	1.49612e-15	7.2622e-16	1.78835e-14	26	21283406	21288806	687
ENSBTAT00000027260	AGPAT3	4.65785	1.50003e-15	7.2622e-16	1.79138e-14	1	146705613	146735094	1424
ENSBTAT00000055155	ENSBTAT00000055155	4.82873	1.50088e-15	7.2622e-16	1.79138e-14	15	51667478	51669427	1950
ENSBTAT00000047273	CHMP1A	3.66191	1.51254e-15	7.3052e-16	1.80396e-14	18	14592688	14599512	1772
ENSBTAT00000007112	ADI1	5.13213	1.52305e-15	7.34814e-16	1.81514e-14	8	112948194	112954511	1107
ENSBTAT00000064878	MRPL36	4.99681	1.52769e-15	7.38009e-16	1.81933e-14	20	70995210	70996377	775
ENSBTAT00000063200	TMSB4X	12.2891	1.53225e-15	7.38009e-16	1.82341e-14	11	63290422	63395507	597
ENSBTAT00000009930	CACNG1	10.1551	1.53418e-15	7.38009e-16	1.82436e-14	19	63738188	63745798	1256
ENSBTAT00000022463	TAF11	4.36626	1.53845e-15	7.41737e-16	1.82809e-14	23	8829177	8836822	1231
ENSBTAT00000045740	PPP1R11	3.20146	1.54466e-15	7.41737e-16	1.83411e-14	23	28707264	28710379	1614
ENSBTAT00000004097	MCM3AP	1.98855	1.56432e-15	7.50817e-16	1.85571e-14	1	147665788	147706423	6069
ENSBTAT00000044622	ENSBTAT00000044622	14.0458	1.56515e-15	7.53963e-16	1.85571e-14	29	40214778	40215227	450
ENSBTAT00000003274	CUGBP1	3.7553	1.56743e-15	7.53963e-16	1.85704e-14	15	78490888	78570865	2243
ENSBTAT00000011678	CAPN1	4.93594	1.57436e-15	7.53963e-16	1.86388e-14	29	44064429	44089990	2255
ENSBTAT00000022319	CLIP1	8.23629	1.57768e-15	7.57651e-16	1.86644e-14	17	55245237	55360147	6137
ENSBTAT00000039335	UCKL1	6.18256	1.58305e-15	7.57651e-16	1.87141e-14	13	54362734	54373970	1763
ENSBTAT00000019557	JTB	4.97173	1.59275e-15	7.61328e-16	1.88151e-14	3	16519220	16521673	1275
ENSBTAT00000044841	OSBPL2	3.71308	1.59465e-15	7.61328e-16	1.88236e-14	13	55448212	55464735	1579
ENSBTAT00000046362	SEPT2	5.68151	1.60374e-15	7.65555e-16	1.89171e-14	3	120968024	120988257	1472
ENSBTAT00000027511	GNAI2	5.57799	1.61105e-15	7.69776e-16	1.89894e-14	22	50670852	50691007	2150
ENSBTAT00000060978	PRKCQ	4.85902	1.61779e-15	7.73425e-16	1.90549e-14	13	17093614	17185063	3183
ENSBTAT00000009870	ENSBTAT00000009870	3.96447	1.62337e-15	7.73425e-16	1.91066e-14	12	28545678	28560619	1925	Uncharacterized protein [Source:UniProtKB/TrEMBL;Acc:F1MV44]
ENSBTAT00000064659	ENSBTAT00000064659	3.74132	1.63002e-15	7.7763e-16	1.91709e-14	11	105907058	105913137	1925	Uncharacterized protein [Source:UniProtKB/TrEMBL;Acc:G3N1P6]
ENSBTAT00000006605	AP3B1	2.21834	1.64134e-15	7.8183e-16	1.929e-14	10	9040253	9300567	3868
ENSBTAT00000001066	ATAD1	4.4113	1.65899e-15	7.90211e-16	1.94832e-14	26	9411265	9448494	2627
ENSBTAT00000008511	C1orf170	7.24056	1.66231e-15	7.90211e-16	1.95079e-14	16	52742637	52748240	3884
ENSBTAT00000046975	SCAMP3	6.26868	1.67072e-15	7.94392e-16	1.95923e-14	3	15432100	15436418	1453
ENSBTAT00000003072	PSMB2	7.50342	1.68516e-15	8.03321e-16	1.97473e-14	3	110720283	110756534	805
ENSBTAT00000021327	EIF4A3	4.548	1.72675e-15	8.21736e-16	2.02199e-14	19	53085463	53097208	1496
ENSBTAT00000008958	ENSBTAT00000008958	6.53322	1.74523e-15	8.30029e-16	2.04215e-14	1	77092288	77092759	472
ENSBTAT00000061230	ZNF770	2.66959	1.75249e-15	8.30029e-16	2.04915e-14	10	30525210	30527276	2067
ENSBTAT00000010121	ENSBTAT00000010121	2.97943	1.77757e-15	8.43034e-16	2.07546e-14	24	25595237	25652303	3121	Uncharacterized protein [Source:UniProtKB/TrEMBL;Acc:F1MLG3]
ENSBTAT00000029071	DDX23	3.85444	1.77715e-15	8.43034e-16	2.07546e-14	5	31101517	31116108	3204
ENSBTAT00000008804	MTX2	4.91674	1.78593e-15	8.47155e-16	2.08371e-14	2	20603385	20678885	1221
ENSBTAT00000056472	ENSBTAT00000056472	4.31531	1.80145e-15	8.51271e-16	2.1003e-14	8	62722030	62722587	558
ENSBTAT00000013428	ILKAP	4.52135	1.80606e-15	8.55381e-16	2.10415e-14	3	118134026	118158557	1271
ENSBTAT00000008068	DYNLRB1	7.30119	1.82109e-15	8.59485e-16	2.12013e-14	13	64466198	64483930	644
ENSBTAT00000007766	DMAP1	3.31874	1.82558e-15	8.63583e-16	2.12382e-14	3	102421544	102430739	1714
ENSBTAT00000043281	BTBD2	3.60161	1.8429e-15	8.67675e-16	2.14242e-14	7	45901193	45923944	1441
ENSBTAT00000000101	HIF1AN	11.5279	1.84961e-15	8.71761e-16	2.14867e-14	26	21291076	21300157	1333
ENSBTAT00000002650	PSMD13	7.72277	1.86337e-15	8.75842e-16	2.1631e-14	11	107246518	107254957	1100
ENSBTAT00000028988	ANXA5	6.72354	1.87391e-15	8.79916e-16	2.17376e-14	6	3542635	3575330	2152
ENSBTAT00000012098	INPP5A	7.0948	1.87894e-15	8.83349e-16	2.17803e-14	26	51126574	51200732	1135
ENSBTAT00000012256	PDCD5	4.91094	1.88536e-15	8.86135e-16	2.18233e-14	18	43254168	43260903	554
ENSBTAT00000020681	TIMM44	4.76289	1.8849e-15	8.83349e-16	2.18233e-14	7	17907314	17920304	1816
ENSBTAT00000016693	MAEA	3.11161	1.88914e-15	8.86135e-16	2.18357e-14	6	109330259	109343607	1243
ENSBTAT00000021155	PDE8A	5.62063	1.8878e-15	8.86135e-16	2.18357e-14	21	23119315	23262118	3195
ENSBTAT00000035463	ABHD17A	7.08629	1.89522e-15	8.90184e-16	2.18902e-14	7	45808716	45816928	1475
ENSBTAT00000000556	CRYAB	35.2461	1.90736e-15	8.94228e-16	2.20146e-14	15	22566929	22570256	711
ENSBTAT00000001830	TMED9	5.66756	1.91697e-15	8.98266e-16	2.21097e-14	7	40475155	40479104	1389
ENSBTAT00000013696	TMEM34	3.33194	1.93266e-15	9.01653e-16	2.22595e-14	17	10643737	10672839	1982
ENSBTAT00000024336	RNF181	7.91731	1.93273e-15	9.01653e-16	2.22595e-14	11	49244485	49246356	581
ENSBTAT00000011028	FEM1B	3.65568	1.93954e-15	9.05677e-16	2.2322e-14	10	15080222	15092340	2395
ENSBTAT00000028556	SSR4	8.59587	1.96594e-15	9.17714e-16	2.25936e-14	X	39925628	39929382	596
ENSBTAT00000032386	TBC1D23	3.68037	1.96536e-15	9.17714e-16	2.25936e-14	1	44199315	44254410	2110
ENSBTAT00000016019	RBX1	5.41357	1.96982e-15	9.17714e-16	2.2622e-14	4	62080988	62082357	1370
ENSBTAT00000002350	LONP1	4.20036	1.98506e-15	9.2637e-16	2.27808e-14	7	19814902	19833230	3073
ENSBTAT00000028860	CACNG6	4.06553	1.99796e-15	9.30362e-16	2.29126e-14	18	62106778	62121184	1263
ENSBTAT00000039155	UBE2V1	7.25192	2.03253e-15	9.43645e-16	2.32923e-14	13	78845236	78873171	1823
ENSBTAT00000003331	SSU72	6.01707	2.03695e-15	9.46273e-16	2.33098e-14	16	52310820	52325725	902
ENSBTAT00000015769	NNT	9.12221	2.03618e-15	9.46273e-16	2.33098e-14	20	31171388	31258005	3710
ENSBTAT00000043069	ABCC9	4.59636	2.03841e-15	9.46273e-16	2.331e-14	5	88677586	88831324	5046
ENSBTAT00000027695	CNOT1	4.2497	2.05504e-15	9.54195e-16	2.34835e-14	18	26390076	26447574	7369
ENSBTAT00000008822	ARIH1	4.84235	2.06e-15	9.54195e-16	2.35235e-14	10	19197514	19300694	2702
ENSBTAT00000036194	CALM	15.9783	2.07634e-15	9.62776e-16	2.36932e-14	10	103059964	103067071	1473
ENSBTAT00000044474	MAPRE1	5.11487	2.09226e-15	9.66036e-16	2.3858e-14	13	62728053	62754549	873
ENSBTAT00000003832	ATP5G3	16.7177	2.09495e-15	9.66036e-16	2.38718e-14	2	21702150	21705260	693
ENSBTAT00000009440	GOT2	15.4545	2.09793e-15	9.69286e-16	2.38889e-14	18	26533095	26556740	2342
ENSBTAT00000028518	FITM1	6.81699	2.10098e-15	9.69286e-16	2.39066e-14	10	20851383	20853174	1424
ENSBTAT00000027702	PIK3R4	3.26796	2.10787e-15	9.72527e-16	2.39681e-14	1	153233567	153320510	4974
ENSBTAT00000007241	SNRPG	7.30352	2.10993e-15	9.72527e-16	2.39745e-14	19	12231223	12231584	362
ENSBTAT00000061390	USP13	9.0653	2.116e-15	9.75072e-16	2.40265e-14	1	87949654	88075267	2723
ENSBTAT00000021393	EMC8	4.43462	2.11982e-15	9.75072e-16	2.4044e-14	18	11788219	11799979	1164
ENSBTAT00000023406	AK2	5.24559	2.12052e-15	9.75072e-16	2.4044e-14	2	121486298	121509903	1612
ENSBTAT00000012920	SF3B5	6.07659	2.1299e-15	9.78982e-16	2.41333e-14	9	82549526	82550198	572
ENSBTAT00000017109	ENSBTAT00000017109	7.94188	2.15036e-15	9.87479e-16	2.4348e-14	20	17609460	17610173	714
ENSBTAT00000004668	COMMD3	7.35041	2.16827e-15	9.95965e-16	2.45336e-14	13	23741427	23743812	753
ENSBTAT00000063085	LINC00998	5.47088	2.17629e-15	9.99852e-16	2.46071e-14	4	55612202	55614012	986
ENSBTAT00000064268	ENSBTAT00000064268	21.9989	2.19657e-15	1.00832e-15	2.48189e-14	6	99999687	100006472	1087
ENSBTAT00000012308	ATXN10	7.41892	2.22221e-15	1.01677e-15	2.5091e-14	5	116756235	116897163	1760
ENSBTAT00000021617	AKTIP	4.24101	2.22883e-15	1.01992e-15	2.51481e-14	18	21926577	21937955	1259
ENSBTAT00000010780	PHKG1	7.10756	2.23458e-15	1.01992e-15	2.51954e-14	25	28005386	28014212	1977
ENSBTAT00000061408	SRRM1	3.8275	2.25347e-15	1.02835e-15	2.53906e-14	2	128848938	128877230	2725
ENSBTAT00000006954	MRPS33	8.67019	2.26439e-15	1.03219e-15	2.54958e-14	4	105101880	105110529	694
ENSBTAT00000035955	SLC29A1	10.0935	2.2702e-15	1.03604e-15	2.55434e-14	23	17845969	17856150	2187
ENSBTAT00000038099	RNF146B	5.11253	2.27914e-15	1.03915e-15	2.5626e-14	9	24273357	24300611	1869
ENSBTAT00000017066	SDF2	3.15596	2.28457e-15	1.03915e-15	2.56691e-14	19	20648944	20656236	885
ENSBTAT00000010676	BXDC5	5.24003	2.29179e-15	1.04298e-15	2.57323e-14	3	59792647	59809111	1321
ENSBTAT00000007642	PSME2	6.57043	2.30083e-15	1.0468e-15	2.58158e-14	10	20838545	20841805	834
ENSBTAT00000002055	ENSBTAT00000002055	10.951	2.30541e-15	1.04989e-15	2.58491e-14	11	29424996	29432052	771	Uncharacterized protein [Source:UniProtKB/TrEMBL;Acc:F1N6C]
ENSBTAT00000014529	HSPB7	21.3557	2.31698e-15	1.05297e-15	2.59248e-14	2	136635160	136637353	568
ENSBTAT00000022558	GANAB	3.39637	2.3145e-15	1.04989e-15	2.59248e-14	29	41664315	41679641	3876
ENSBTAT00000028266	FBXL5	4.69416	2.31624e-15	1.05297e-15	2.59248e-14	6	115573481	115610298	2197
ENSBTAT00000044819	CCT4	6.70239	2.32975e-15	1.05678e-15	2.60496e-14	11	60397422	60410035	1963
ENSBTAT00000000445	bta-mir-6527	3.02204	2.34643e-15	1.06437e-15	2.61996e-14	13	79548065	79556310	3309
ENSBTAT00000022877	MFAP1	3.04628	2.34556e-15	1.06437e-15	2.61996e-14	21	55977102	55988466	1923
ENSBTAT00000011734	SF3B1	7.11992	2.42863e-15	1.09908e-15	2.70799e-14	2	86349373	86387060	6357
ENSBTAT00000066226	ENSBTAT00000066226	7.40147	2.42818e-15	1.09908e-15	2.70799e-14	22	13679510	13681231	1722
ENSBTAT00000003419	ZDHHC7	5.69008	2.4421e-15	1.10207e-15	2.71924e-14	18	11116413	11133102	1078
ENSBTAT00000005174	OTUB1	4.66794	2.44076e-15	1.10207e-15	2.71924e-14	29	42882593	42889928	991
ENSBTAT00000005916	COL4A2	11.1157	2.45153e-15	1.10583e-15	2.72785e-14	12	89112423	89165255	4965
ENSBTAT00000012175	KDELR2	5.50517	2.47134e-15	1.11408e-15	2.748e-14	25	38871560	38886919	1096
ENSBTAT00000042556	HN1	5.72986	2.4852e-15	1.12155e-15	2.76151e-14	19	56938745	56953081	1459
ENSBTAT00000016884	GLO1	7.53457	2.4877e-15	1.12155e-15	2.76237e-14	23	12483468	12509232	1973
ENSBTAT00000020793	DNAJC21	5.51363	2.49954e-15	1.12451e-15	2.77361e-14	20	39225166	39252050	2084
ENSBTAT00000003239	VPS35	3.86173	2.50161e-15	1.12451e-15	2.774e-14	18	15038821	15066463	3200
ENSBTAT00000050132	ANXA7	5.63784	2.52767e-15	1.13722e-15	2.80096e-14	28	29552050	29573976	1843
ENSBTAT00000021686	TM9SF3	3.64492	2.53687e-15	1.14093e-15	2.80923e-14	26	17712946	17774060	5279
ENSBTAT00000045257	SCAF8	2.50201	2.56036e-15	1.14754e-15	2.83329e-14	9	92829771	92873594	3807
ENSBTAT00000007636	MICU1	5.41699	2.56428e-15	1.14754e-15	2.83427e-14	28	28562368	28777941	2347
ENSBTAT00000017986	EFTUD2	3.32632	2.56477e-15	1.14754e-15	2.83427e-14	19	45197098	45233617	3321
ENSBTAT00000010324	EED	3.49445	2.56797e-15	1.14966e-15	2.83586e-14	29	9325136	9355669	1539
ENSBTAT00000007965	TMEM230	4.04943	2.57038e-15	1.14966e-15	2.83658e-14	13	47779510	47787910	1527
ENSBTAT00000009985	CHUK	2.87332	2.57296e-15	1.14966e-15	2.83748e-14	26	20966010	21008277	3421
ENSBTAT00000043835	FASTK	5.41571	2.58045e-15	1.15255e-15	2.84379e-14	4	114450706	114455203	1802
ENSBTAT00000008386	GPI	16.9129	2.58224e-15	1.15255e-15	2.84382e-14	18	44979578	45007642	2030
ENSBTAT00000063192	IGFN1	15.7153	2.58583e-15	1.15623e-15	2.84583e-14	16	81604665	81641464	7887
ENSBTAT00000007327	RNASEH2C	5.38867	2.60969e-15	1.16277e-15	2.86817e-14	29	44552309	44553484	640
ENSBTAT00000008994	ACYP2	10.6919	2.60862e-15	1.16277e-15	2.86817e-14	11	36683363	36862401	873
ENSBTAT00000028608	PSMD3	7.59359	2.61237e-15	1.16277e-15	2.86915e-14	19	40961497	40974702	2124
ENSBTAT00000022780	STX7	4.09348	2.62319e-15	1.16643e-15	2.87907e-14	9	71381757	71455585	2180
ENSBTAT00000024600	NDUFS3	12.7134	2.62983e-15	1.17009e-15	2.88439e-14	15	78582186	78586701	775
ENSBTAT00000045527	RANBP2	3.64576	2.6411e-15	1.17294e-15	2.89479e-14	11	44509064	44570848	10000
ENSBTAT00000013586	GGNBP2	2.74507	2.64295e-15	1.17294e-15	2.89484e-14	19	13201947	13234944	2351
ENSBTAT00000066051	SPEG	6.4685	2.6724e-15	1.18546e-15	2.9251e-14	2	108089328	108147468	10000
ENSBTAT00000016242	TUBA1B	8.4639	2.74234e-15	1.21572e-15	2.99962e-14	5	30864529	30868119	1732
CUFF.3088.1	UNANNOTATED	9.75845	2.74746e-15	1.21602e-15	3.00028e-14	10	1762679	1764335	736
ENSBTAT00000044296	ADSSL1	11.1386	2.74753e-15	1.21602e-15	3.00028e-14	21	70845971	70861972	1483
ENSBTAT00000047359	PPAP2A	6.54116	2.74854e-15	1.21602e-15	3.00028e-14	20	23658802	23793336	1519
ENSBTAT00000000481	DIS3L	4.82929	2.75461e-15	1.21602e-15	3.00259e-14	10	13162027	13194338	3519
ENSBTAT00000002420	POLR2C	7.07114	2.75624e-15	1.21797e-15	3.00259e-14	18	25539095	25547404	1719
ENSBTAT00000026526	SDCBP	4.39388	2.75373e-15	1.21602e-15	3.00259e-14	14	26412824	26447192	2001
ENSBTAT00000016549	ILF2	5.3822	2.76436e-15	1.21797e-15	3.00736e-14	3	16772702	16783233	1608
ENSBTAT00000035053	TVP23B	3.3092	2.76398e-15	1.21797e-15	3.00736e-14	19	33585303	33594740	1749
ENSBTAT00000023642	HSD17B10	6.06065	2.7712e-15	1.22156e-15	3.01277e-14	X	96267144	96269467	951
ENSBTAT00000002170	PICALM	6.3161	2.77754e-15	1.22349e-15	3.01558e-14	29	9613012	9665840	1850
ENSBTAT00000018877	S100A16	10.3039	2.7762e-15	1.22349e-15	3.01558e-14	3	16830511	16837422	1061
ENSBTAT00000028023	ARNT	3.16896	2.78462e-15	1.22349e-15	3.02124e-14	3	19956088	19991725	2349
ENSBTAT00000006265	SCN4A	5.55472	2.80521e-15	1.2342e-15	3.04052e-14	19	48794399	48825660	5505
ENSBTAT00000039673	SMIM20	7.38989	2.80617e-15	1.2342e-15	3.04052e-14	6	46975914	46988666	941
ENSBTAT00000022386	TAPBP	6.15433	2.8105e-15	1.2342e-15	3.04316e-14	23	7415849	7425523	2346
ENSBTAT00000013602	GTF2A2	4.93261	2.82187e-15	1.23693e-15	3.05137e-14	10	50655754	50687544	775
ENSBTAT00000024105	TBL1X	4.48212	2.82008e-15	1.23693e-15	3.05137e-14	X	144430889	144489539	1587
ENSBTAT00000055067	ENSBTAT00000055067	3.40613	2.84579e-15	1.24925e-15	3.07517e-14	13	74496558	74498471	1914	Uncharacterized protein [Source:UniProtKB/TrEMBL;Acc:G3MYV5]
ENSBTAT00000021398	TRAK1	7.73584	2.86772e-15	1.25717e-15	3.09679e-14	22	15084213	15160669	2132
ENSBTAT00000009346	ES1	7.30351	2.9015e-15	1.26946e-15	3.13117e-14	1	146859201	146867963	1251
ENSBTAT00000004644	DDX19B	2.76663	2.94308e-15	1.28611e-15	3.17391e-14	18	1799804	1821405	1697
ENSBTAT00000003716	ACAA2	7.39287	2.97007e-15	1.29836e-15	3.20088e-14	24	49908126	49942827	1579
ENSBTAT00000039835	CAMK2D	7.797	3.00079e-15	1.3106e-15	3.23183e-14	6	12965129	13272298	2992
ENSBTAT00000012612	SAPS3	4.04013	3.0095e-15	1.31321e-15	3.23904e-14	29	46632382	46716791	4227
ENSBTAT00000046448	CALM	8.25509	3.01196e-15	1.31321e-15	3.23951e-14	20	8066341	8067501	1161
ENSBTAT00000001128	PPP1R2	9.91474	3.02811e-15	1.32017e-15	3.25472e-14	1	72708757	72726620	964
ENSBTAT00000010682	GNG5	7.22451	3.03365e-15	1.32017e-15	3.2585e-14	3	59783839	59791977	552
ENSBTAT00000033703	FKBP9	3.96904	3.06616e-15	1.33582e-15	3.29121e-14	4	64209775	64252100	2239
ENSBTAT00000009806	DNASE1L1	7.11252	3.07289e-15	1.33582e-15	3.29625e-14	X	40368988	40371659	849
ENSBTAT00000004594	CYCS	17.6524	3.08437e-15	1.33928e-15	3.30636e-14	11	98339924	98340241	318
ENSBTAT00000025716	USP25	8.19709	3.10045e-15	1.34618e-15	3.32138e-14	1	20664990	20798853	3246
ENSBTAT00000003616	SEC24C	4.20729	3.10324e-15	1.34618e-15	3.32215e-14	28	29812282	29832215	3514
ENSBTAT00000013895	TBRG4	6.29505	3.12113e-15	1.35307e-15	3.33909e-14	4	77224764	77231980	1849
ENSBTAT00000040201	MPC1	12.6337	3.12465e-15	1.35307e-15	3.34064e-14	9	102880277	102893601	959
ENSBTAT00000019411	CALM	17.1656	3.13194e-15	1.3565e-15	3.34621e-14	18	54169313	54178928	2075
ENSBTAT00000065888	DGCR6L	7.12717	3.14299e-15	1.35993e-15	3.35578e-14	17	74049772	74053881	838
ENSBTAT00000038477	RBM24	6.02326	3.16927e-15	1.37202e-15	3.3816e-14	23	39835982	39846198	827
ENSBTAT00000014162	NACA	6.5489	3.17881e-15	1.37452e-15	3.38954e-14	5	57063071	57074070	928
ENSBTAT00000020355	LTBR	2.488	3.18122e-15	1.37452e-15	3.38986e-14	5	104346662	104354420	2103
ENSBTAT00000005590	TRAPPC5	6.14817	3.20664e-15	1.38474e-15	3.41469e-14	7	17750387	17752622	641
ENSBTAT00000000506	SSPN	8.79215	3.21231e-15	1.38474e-15	3.41629e-14	5	84096324	84138430	786
ENSBTAT00000010711	PKIA	13.9292	3.21239e-15	1.38474e-15	3.41629e-14	14	43880469	43978277	1881
ENSBTAT00000027457	SMTNL2	15.609	3.21695e-15	1.38722e-15	3.41889e-14	19	25702553	25724157	2278
ENSBTAT00000024373	PPP2R2A	5.5886	3.22239e-15	1.38722e-15	3.42241e-14	8	74834628	74913332	2109
ENSBTAT00000045493	ATXN2L	3.40313	3.2262e-15	1.39061e-15	3.42419e-14	25	26232746	26243618	3590
ENSBTAT00000016211	WAPAL	3.32367	3.24663e-15	1.39646e-15	3.44174e-14	28	41492640	41565133	4105
ENSBTAT00000024307	PDHX	7.00708	3.24701e-15	1.39646e-15	3.44174e-14	15	66231837	66307403	2283
ENSBTAT00000025405	SRP54	3.96312	3.25138e-15	1.39646e-15	3.44411e-14	21	45732641	45762266	1704
ENSBTAT00000025454	EIF4EBP2	7.29943	3.32083e-15	1.4256e-15	3.51536e-14	28	26764785	26786028	1184
ENSBTAT00000035646	ENSBTAT00000035646	16.1721	3.35681e-15	1.44088e-15	3.55112e-14	12	36491414	36491611	198
ENSBTAT00000001725	FXN	4.23968	3.36021e-15	1.44088e-15	3.55238e-14	8	45503979	45528322	1498
ENSBTAT00000026578	ARMC8	3.77789	3.36936e-15	1.44328e-15	3.55972e-14	1	131883675	131990621	2692
ENSBTAT00000022448	OSER1	6.38143	3.37464e-15	1.44328e-15	3.56296e-14	13	73391554	73401614	1520
ENSBTAT00000008979	LMAN1	3.17288	3.38984e-15	1.45089e-15	3.57666e-14	24	58797010	58815897	1698
ENSBTAT00000004805	FOXK2	3.69403	3.39802e-15	1.45422e-15	3.58294e-14	19	50650350	50695396	1696
ENSBTAT00000011979	GNG10	6.84941	3.40766e-15	1.45754e-15	3.59075e-14	8	102784501	102790524	1183
ENSBTAT00000006451	INTS8	4.09874	3.42905e-15	1.46513e-15	3.61093e-14	14	71820446	71848531	2083
ENSBTAT00000024663	TUBA8	11.7048	3.44937e-15	1.47175e-15	3.62995e-14	5	109876442	109894993	1512
ENSBTAT00000015001	LZTR1	2.41839	3.45458e-15	1.47175e-15	3.63306e-14	17	74319809	74331832	2664
ENSBTAT00000000705	CCDC104	3.9413	3.46851e-15	1.47738e-15	3.64296e-14	11	38066011	38095813	1117
ENSBTAT00000005857	KDELR1	5.62547	3.46798e-15	1.47738e-15	3.64296e-14	18	55525319	55534438	865
ENSBTAT00000004574	NOL3	10.0803	3.47216e-15	1.47738e-15	3.64441e-14	18	34928332	34931932	916
ENSBTAT00000027065	C11H9ORF78	3.16238	3.4792e-15	1.47971e-15	3.64704e-14	11	100228241	100236769	1391
ENSBTAT00000055001	CUL2	3.36717	3.47778e-15	1.47971e-15	3.64704e-14	13	18592918	18664294	3019
ENSBTAT00000038531	H2B	14.3164	3.48799e-15	1.483e-15	3.65388e-14	3	20771300	20773622	2323
ENSBTAT00000035398	CTR9	2.76669	3.50469e-15	1.48628e-15	3.66899e-14	15	42464354	42499295	3670
ENSBTAT00000025431	TSC22D1	8.56314	3.52308e-15	1.4938e-15	3.68584e-14	12	14722213	14725630	1847
ENSBTAT00000013796	PA2G4	6.0828	3.53001e-15	1.4961e-15	3.69035e-14	5	57532245	57538950	1613
ENSBTAT00000026179	TRIM41	2.15575	3.53197e-15	1.4961e-15	3.69035e-14	7	41751572	41760057	1608
ENSBTAT00000052712	BCLAF1	4.34073	3.5492e-15	1.50263e-15	3.70595e-14	9	75262831	75291455	3321
ENSBTAT00000008526	GIT2	2.24622	3.55156e-15	1.50263e-15	3.706e-14	17	65556431	65596948	3278
ENSBTAT00000064442	ARPC5	4.04651	3.58371e-15	1.51435e-15	3.73713e-14	16	66150415	66159807	1897
ENSBTAT00000012501	KDM1A	2.50134	3.59725e-15	1.52084e-15	3.74882e-14	2	130370509	130436531	2751
ENSBTAT00000008477	GGA1	3.33715	3.60346e-15	1.52084e-15	3.75287e-14	5	109960769	109979896	2774
ENSBTAT00000026604	CDC16	3.27295	3.60835e-15	1.52407e-15	3.75553e-14	12	91039122	91065655	2199
ENSBTAT00000015530	MAPKAPK2	7.20939	3.61556e-15	1.52731e-15	3.7606e-14	16	4319154	4365926	1297
ENSBTAT00000009395	WSB2	8.19304	3.62555e-15	1.52955e-15	3.76704e-14	17	59422963	59437371	2089
ENSBTAT00000061174	RALBP1	3.83788	3.62642e-15	1.52955e-15	3.76704e-14	24	42061941	42079438	2181
ENSBTAT00000045265	MDM2	5.07373	3.64245e-15	1.53278e-15	3.78124e-14	5	45178135	45203567	2666
ENSBTAT00000030078	DPF2	4.29414	3.64626e-15	1.536e-15	3.78276e-14	29	44205032	44217694	2449
ENSBTAT00000018327	DNAJB2	4.55691	3.65795e-15	1.53921e-15	3.79245e-14	2	107949740	107957014	1894
ENSBTAT00000009950	URI1	3.16436	3.68636e-15	1.55083e-15	3.81944e-14	18	40683382	40745558	2522
CUFF.14886.1	UNANNOTATED	170.79	3.69872e-15	1.55403e-15	3.82978e-14	16	624274	624369	96	Cytochrome c oxidase subunit 2[Source:UniProtKB/TrEMBL;Acc:COX2]
ENSBTAT00000012242	EVL	5.7401	3.71599e-15	1.56143e-15	3.84519e-14	21	66675974	66738876	1858
ENSBTAT00000007948	BZW1	6.03344	3.7299e-15	1.56462e-15	3.8571e-14	2	89886720	89897574	1770
ENSBTAT00000047777	NCKAP1	5.59741	3.73881e-15	1.56781e-15	3.86383e-14	2	13575102	13664827	3453
ENSBTAT00000012523	DBI	10.3801	3.74556e-15	1.57099e-15	3.86833e-14	2	71561192	71566372	608
ENSBTAT00000011098	KIAA0141	5.25407	3.78334e-15	1.58153e-15	3.90235e-14	7	54670603	54685592	2541
ENSBTAT00000018906	RAN	3.79102	3.7816e-15	1.58153e-15	3.90235e-14	X	57523485	57525442	651
ENSBTAT00000017282	NAA30	4.34807	3.80617e-15	1.59306e-15	3.92337e-14	10	70014347	70031590	1244
ENSBTAT00000015848	TPR	3.08808	3.81553e-15	1.5952e-15	3.93051e-14	16	68886195	68949366	7224
ENSBTAT00000026818	PPP3CC	4.60196	3.81808e-15	1.5952e-15	3.93062e-14	8	70262316	70341783	2110
ENSBTAT00000029301	NDUFS1	9.29448	3.83002e-15	1.59836e-15	3.94039e-14	2	94893227	94922667	3338
ENSBTAT00000007398	PAFAH1B2	4.28732	3.83582e-15	1.60048e-15	3.94384e-14	15	28260081	28286877	2194
ENSBTAT00000011533	MARCH7	5.20936	3.84058e-15	1.60048e-15	3.94622e-14	2	36682216	36729906	3477
ENSBTAT00000001140	NXN	6.09932	3.86224e-15	1.6037e-15	3.95772e-14	19	22457712	22621493	2818
ENSBTAT00000006308	RRN3	2.6328	3.86653e-15	1.60581e-15	3.95772e-14	25	13778681	13805653	2755
ENSBTAT00000007635	TMEM14C	10.0815	3.86381e-15	1.6037e-15	3.95772e-14	23	45265659	45272354	896
ENSBTAT00000016951	MRPL2	5.91986	3.86446e-15	1.6037e-15	3.95772e-14	23	16656285	16660495	1047
ENSBTAT00000038164	CTDSP2	6.1399	3.85698e-15	1.6037e-15	3.95772e-14	5	55959928	55980357	2441
ENSBTAT00000064686	TUBG1	4.98921	3.8637e-15	1.6037e-15	3.95772e-14	19	43316471	43321165	1648
CUFF.16442.2	MAPKAPK2	8.56466	3.87198e-15	1.60581e-15	3.96078e-14	16	4319154	4367218	2586
ENSBTAT00000023988	MAPK14	3.73556	3.87767e-15	1.60894e-15	3.96409e-14	23	9944807	10023618	4251
ENSBTAT00000014882	GALNT1	2.9095	3.89901e-15	1.61621e-15	3.98337e-14	24	21687846	21756844	2247
ENSBTAT00000002017	SAV1	2.00698	3.9105e-15	1.61933e-15	3.99257e-14	10	43571065	43599997	2028
ENSBTAT00000043099	ENSBTAT00000043099	3.50922	3.91836e-15	1.62141e-15	3.99807e-14	3	100411038	100415225	1416	Bos taurus leucine rich repeat containing 41 (LRRC41), mRNA. [Source:RefSeq mRNA;Acc:NM_145873]
ENSBTAT00000026582	CMPK1	2.09373	3.92349e-15	1.62141e-15	4.00076e-14	3	99484969	99521190	1746
ENSBTAT00000025174	NDUFAF3	6.76335	3.9303e-15	1.62452e-15	4.00518e-14	22	51540981	51542102	713
ENSBTAT00000053855	CEBPZ	3.04774	3.95158e-15	1.63175e-15	4.02431e-14	11	19659022	19683088	3394
ENSBTAT00000017891	RAB3GAP1	3.87846	3.96785e-15	1.63794e-15	4.03833e-14	2	62457398	62568130	3596
ENSBTAT00000008851	PPP1R3A	13.9914	3.97069e-15	1.63794e-15	4.03867e-14	4	54866421	54906096	3341
ENSBTAT00000000359	PFKM	21.2024	3.9801e-15	1.64e-15	4.04313e-14	5	32312957	32337525	2805
ENSBTAT00000006825	SYS1	8.18941	3.9801e-15	1.64e-15	4.04313e-14	13	74429935	74433440	887
ENSBTAT00000015996	PRDX2	12.5564	4.01955e-15	1.65543e-15	4.08063e-14	7	13845843	13848479	1013
ENSBTAT00000015790	WASH1	6.50439	4.05658e-15	1.66875e-15	4.11563e-14	5	107498778	107514651	1909
ENSBTAT00000007768	PATL1	3.33648	4.05926e-15	1.66875e-15	4.11575e-14	15	84160420	84188567	4067
ENSBTAT00000066016	PPP6R1	3.30031	4.06396e-15	1.66875e-15	4.11792e-14	18	62665594	62676429	2811
ENSBTAT00000025006	NELFCD	4.72677	4.06978e-15	1.67181e-15	4.12123e-14	13	57899212	57909996	2294
ENSBTAT00000009496	KIAA0195	2.86738	4.08095e-15	1.67381e-15	4.12844e-14	19	56679702	56697953	4282
ENSBTAT00000045888	ENSBTAT00000045888	9.81025	4.08203e-15	1.67381e-15	4.12844e-14	22	48146336	48146712	377
ENSBTAT00000019699	HNRPDL	6.28111	4.09066e-15	1.67686e-15	4.13457e-14	6	98983515	98990087	3030
ENSBTAT00000065281	TRAPPC1	4.94124	4.10826e-15	1.684e-15	4.14975e-14	19	28221790	28223283	784
ENSBTAT00000010804	RBM7	2.16853	4.14905e-15	1.69826e-15	4.18833e-14	15	25256166	25263448	1871
ENSBTAT00000042894	MTFR1L	4.97357	4.1517e-15	1.69826e-15	4.18838e-14	2	127834362	127849364	1939
ENSBTAT00000020908	SYNJ2BP	4.28705	4.18237e-15	1.70947e-15	4.21668e-14	10	82347063	82386494	1144
ENSBTAT00000029290	EYA4	5.97215	4.22248e-15	1.72474e-15	4.25445e-14	9	72661136	72736460	2115
ENSBTAT00000007723	CD82	7.86776	4.2663e-15	1.74409e-15	4.29591e-14	15	75507140	75567303	1723
ENSBTAT00000006800	NAPG	3.50292	4.28396e-15	1.74708e-15	4.31101e-14	24	42616054	42628182	2958
ENSBTAT00000018514	NTPCR	5.79451	4.30217e-15	1.75415e-15	4.32663e-14	28	5872192	5910468	1272
ENSBTAT00000020904	GMPR	11.5005	4.30698e-15	1.75713e-15	4.32876e-14	23	40616330	40677006	1403
ENSBTAT00000002626	RPL5	10.4196	4.32718e-15	1.76308e-15	4.34635e-14	3	50787385	50795965	1006
ENSBTAT00000063911	TRIP10	7.51508	4.33219e-15	1.76308e-15	4.34866e-14	7	18967189	18970399	967
ENSBTAT00000025007	CTSZ	4.09022	4.33538e-15	1.76386e-15	4.34916e-14	13	57889707	57899205	1413
ENSBTAT00000022372	SNRNP40	3.36599	4.34114e-15	1.76386e-15	4.34951e-14	2	122889872	122915674	1554
ENSBTAT00000056899	MGC142811	5.91128	4.33851e-15	1.76386e-15	4.34951e-14	25	3744167	3749205	1358
ENSBTAT00000017232	SARS	5.94725	4.37822e-15	1.77901e-15	4.38394e-14	3	34283445	34303242	1785
ENSBTAT00000018453	RELA	2.95822	4.39332e-15	1.78196e-15	4.39632e-14	29	44496359	44505000	2522
ENSBTAT00000046275	PAICS	4.96397	4.45215e-15	1.80519e-15	4.45242e-14	6	73488049	73507190	1634
ENSBTAT00000027539	CIP29	4.50408	4.48904e-15	1.82029e-15	4.48653e-14	5	57774486	57823736	874
ENSBTAT00000009864	HNRPH2	3.87839	4.52878e-15	1.83423e-15	4.52345e-14	X	55234948	55241418	2352
ENSBTAT00000015301	MRPL44	3.41493	4.53302e-15	1.83423e-15	4.52487e-14	2	112851020	112858967	1390
ENSBTAT00000061283	ATL2	9.60225	4.53941e-15	1.83714e-15	4.52844e-14	11	20691386	20758963	1753
ENSBTAT00000006219	LRRC47	3.58008	4.55571e-15	1.84409e-15	4.54188e-14	16	50540189	50551301	3334
ENSBTAT00000002038	EPC1	2.37617	4.56803e-15	1.84699e-15	4.55135e-14	13	33451679	33518736	2771
ENSBTAT00000009720	SEC62	4.94683	4.59896e-15	1.85681e-15	4.57934e-14	1	98180183	98202494	1230
ENSBTAT00000047363	SKIV2L2	2.52451	4.6028e-15	1.85681e-15	4.58033e-14	20	23727322	23853276	2992
ENSBTAT00000045695	CLSTN1	3.98089	4.61362e-15	1.8597e-15	4.58826e-14	16	44633323	44671659	2967
ENSBTAT00000023649	ENSBTAT00000023649	5.57533	4.62146e-15	1.86258e-15	4.59322e-14	7	54224152	54224730	579	Uncharacterized protein [Source:UniProtKB/TrEMBL;Acc:F6PWD5]
ENSBTAT00000021952	POLDIP3	3.53089	4.65564e-15	1.87755e-15	4.62434e-14	5	113982763	114005896	3415
ENSBTAT00000011684	NCBP2	4.23721	4.68883e-15	1.88731e-15	4.65157e-14	1	72014192	72020012	1040
ENSBTAT00000065501	ENSBTAT00000065501	5.97453	4.68857e-15	1.88731e-15	4.65157e-14	4	17767925	17769016	1092
CUFF.14883.1	UNANNOTATED	148.322	4.7178e-15	1.89821e-15	4.67742e-14	16	622716	622798	83	Cytochrome c oxidase subunit 1[Source:UniProtKB/TrEMBL;Acc:COX1]
ENSBTAT00000008676	TMCC1	7.26384	4.74209e-15	1.90508e-15	4.69861e-14	22	56700645	56742873	2495
ENSBTAT00000001187	PGK1	13.6956	4.76107e-15	1.91195e-15	4.71451e-14	X	79282708	79305386	1807
ENSBTAT00000013968	DHRS7B	3.84524	4.79044e-15	1.92281e-15	4.74068e-14	19	35768850	35815316	1237
ENSBTAT00000018503	SRCAP	2.04866	4.81476e-15	1.92966e-15	4.76182e-14	25	27089883	27117931	10130
ENSBTAT00000015748	MTA2	2.61996	4.8326e-15	1.9353e-15	4.7736e-14	29	41636478	41644877	2736
ENSBTAT00000049318	DENR	4.49306	4.83231e-15	1.9353e-15	4.7736e-14	29	7723701	7725004	1304
ENSBTAT00000009148	DHX16	2.47895	4.87484e-15	1.95013e-15	4.81238e-14	23	28140250	28152483	3372
ENSBTAT00000017445	EMG1	5.9099	4.88102e-15	1.95294e-15	4.81552e-14	5	103847447	103853139	1017
ENSBTAT00000004658	SETD7	9.60862	4.88531e-15	1.95574e-15	4.81681e-14	17	18463314	18515964	1143
ENSBTAT00000009461	RCHY1	5.21629	4.94434e-15	1.97453e-15	4.87202e-14	6	92061508	92076962	1716
CUFF.19102.1	PDPR	3.0508	4.94831e-15	1.97611e-15	4.87295e-14	18	1906535	1951990	7737
ENSBTAT00000017178	PPP4C	6.10325	4.95384e-15	1.97611e-15	4.87542e-14	25	26460142	26468245	1329
ENSBTAT00000009603	SF3A3	3.43394	4.97457e-15	1.98288e-15	4.89282e-14	3	108559741	108586049	1789
ENSBTAT00000049046	FAM127A	4.81363	4.98423e-15	1.98566e-15	4.89933e-14	X	18687103	18688288	1186
ENSBTAT00000008042	RSRC2	4.94908	4.99915e-15	1.9912e-15	4.90801e-14	17	55171411	55187330	2182
ENSBTAT00000063619	ENSBTAT00000063619	7.50537	4.99691e-15	1.9912e-15	4.90801e-14	9	28544216	28544698	483	Uncharacterized protein [Source:UniProtKB/TrEMBL;Acc:G3MZV]
ENSBTAT00000004398	SF3A1	4.42165	5.1562e-15	2.05367e-15	5.05911e-14	17	71497415	71517122	2890
ENSBTAT00000015606	SYNM	11.2659	5.17198e-15	2.05389e-15	5.06722e-14	21	7768429	7793372	5133
ENSBTAT00000019039	ENSBTAT00000019039	4.23255	5.1739e-15	2.05389e-15	5.06722e-14	28	24904446	24915401	2365	Bos taurus heterogeneous nuclear ribonucleoprotein H3 (2H9) (HNRNPH3), mRNA. [Source:RefSeq mRNA;Acc:NM_126579]
ENSBTAT00000036417	ESRRA	8.28213	5.16868e-15	2.05389e-15	5.06722e-14	29	43221839	43228308	2068
ENSBTAT00000022378	PPIB	8.39705	5.19229e-15	2.06059e-15	5.08213e-14	10	45874978	45880918	886
ENSBTAT00000008473	DLST	8.59217	5.2028e-15	2.0633e-15	5.08932e-14	10	86533853	86550983	1432
ENSBTAT00000002366	SCAF11	3.56429	5.22317e-15	2.06998e-15	5.10615e-14	5	34430403	34480031	4571
ENSBTAT00000016518	CCDC91	2.33611	5.22792e-15	2.07269e-15	5.10769e-14	5	81582317	81992463	2540
ENSBTAT00000018406	C25H16ORF72	5.91157	5.24939e-15	2.07935e-15	5.12556e-14	25	7931600	7955194	1036
ENSBTAT00000026471	NRP1	6.28508	5.27868e-15	2.08997e-15	5.15104e-14	13	19911857	20056980	3072
ENSBTAT00000009951	TRAM1	4.34222	5.3296e-15	2.10848e-15	5.19757e-14	14	36385096	36417387	1325
ENSBTAT00000005534	TSR1	2.92156	5.3563e-15	2.11906e-15	5.22045e-14	19	23877562	23886659	2633
ENSBTAT00000006703	RPRD1B	2.51137	5.36784e-15	2.12173e-15	5.22853e-14	13	67570198	67628069	3847
ENSBTAT00000018087	BRWD1	1.62096	5.39864e-15	2.1323e-15	5.25535e-14	1	140741647	140863405	7959
ENSBTAT00000064323	NAA10	10.6107	5.4137e-15	2.13495e-15	5.26683e-14	X	40060594	40061079	210
ENSBTAT00000038527	ENSBTAT00000038527	5.97796	5.48445e-15	2.16127e-15	5.33244e-14	2	23443013	23608298	2538	Bos taurus sterile alpha motif and leucine zipper containing kinase AZK (ZAK), mRNA. [Source:RefSeq mRNA;Acc:NM_125493]
ENSBTAT00000029092	HFE2	8.22794	5.49697e-15	2.16785e-15	5.34139e-14	3	21470721	21474444	1522
ENSBTAT00000028494	FARSA	3.73954	5.51192e-15	2.17048e-15	5.35268e-14	7	13741743	13751839	1827
ENSBTAT00000013841	AIP	5.16407	5.53065e-15	2.17574e-15	5.36439e-14	29	46012079	46018138	1131
ENSBTAT00000057552	RPS27L	9.05989	5.52745e-15	2.17574e-15	5.36439e-14	3	101348534	101349004	471
ENSBTAT00000034732	PPP1R27	22.2288	5.53697e-15	2.17836e-15	5.36729e-14	19	51658342	51659508	806
ENSBTAT00000025587	SH2B1	3.33576	5.57898e-15	2.19277e-15	5.40476e-14	25	26208972	26214950	2414
ENSBTAT00000011906	AP3D1	5.04563	5.60744e-15	2.20323e-15	5.42906e-14	7	22709434	22743787	4666
CUFF.48816.1	LOC616304	3.08496	5.62336e-15	2.20583e-15	5.44121e-14	9	946272	948284	2013
ENSBTAT00000024401	ENSBTAT00000024401	5.28882	5.67067e-15	2.22412e-15	5.48369e-14	8	15978603	15979256	654
ENSBTAT00000044548	SELT	3.21079	5.71429e-15	2.23846e-15	5.52256e-14	1	118445768	118476097	3277
ENSBTAT00000022697	WBSCR22	4.3702	5.74766e-15	2.25144e-15	5.55148e-14	25	34072620	34083970	1116
ENSBTAT00000012912	GKAP1	9.89561	5.75433e-15	2.25144e-15	5.55459e-14	8	78327713	78418760	1567
ENSBTAT00000022882	ENSBTAT00000022882	6.55193	5.77671e-15	2.26183e-15	5.57285e-14	19	5065786	5066986	495	Uncharacterized protein [Source:UniProtKB/TrEMBL;Acc:G3MWQ7]
ENSBTAT00000025998	SNX17	4.09033	5.81176e-15	2.27221e-15	5.6033e-14	11	72277210	72282953	1874
ENSBTAT00000015161	TESK1	5.75268	5.84626e-15	2.28649e-15	5.63319e-14	8	60207472	60212368	2552
ENSBTAT00000063789	TCEB3	3.08042	5.88126e-15	2.29684e-15	5.66352e-14	2	129738383	129752889	2734
ENSBTAT00000063929	UBE2G2	4.53877	5.88727e-15	2.29937e-15	5.66592e-14	1	146114659	146120826	857
ENSBTAT00000009643	ATP5L	12.5987	5.91785e-15	2.3097e-15	5.69196e-14	15	29521980	29530109	474
ENSBTAT00000038295	ENSBTAT00000038295	6.6666	5.92971e-15	2.31222e-15	5.69996e-14	4	115901833	115951987	1404	Uncharacterized protein [Source:UniProtKB/TrEMBL;Acc:F1N6J8]
ENSBTAT00000055589	ENSBTAT00000055589	3.70183	5.94628e-15	2.31863e-15	5.71247e-14	28	25207673	25221175	1557	Uncharacterized protein [Source:UniProtKB/TrEMBL;Acc:E1BJ81]
ENSBTAT00000020729	RPL15	6.6396	6.02582e-15	2.34841e-15	5.78543e-14	27	41930646	41934590	2194
ENSBTAT00000020094	ATP6V0E1	4.62198	6.03621e-15	2.3495e-15	5.79195e-14	20	4641618	4671634	823
ENSBTAT00000004503	TFG	4.29159	6.045e-15	2.3495e-15	5.79693e-14	1	45489052	45521372	1947
ENSBTAT00000019577	CLPP	6.58539	6.06171e-15	2.35588e-15	5.8095e-14	7	19302913	19308138	1032
ENSBTAT00000066088	SSNA1	6.37381	6.09348e-15	2.36613e-15	5.83648e-14	11	105904770	105905783	726
ENSBTAT00000013909	BCKDK	3.77217	6.10287e-15	2.36861e-15	5.842e-14	25	27468636	27472842	1784
ENSBTAT00000061619	GBF1	3.52012	6.11237e-15	2.37108e-15	5.84761e-14	26	22761606	22884208	5840
ENSBTAT00000002431	SGCG	7.51087	6.18655e-15	2.4007e-15	5.91507e-14	12	34924193	34954970	1554
ENSBTAT00000043067	PROB1	4.93744	6.21313e-15	2.40703e-15	5.93695e-14	7	52290536	52293580	3045
ENSBTAT00000037556	ATP6V0C	6.57989	6.22194e-15	2.40947e-15	5.94184e-14	25	2014229	2019603	1139
ENSBTAT00000052616	EVI5L	3.07879	6.25716e-15	2.42353e-15	5.97194e-14	7	17832596	17865095	3854
ENSBTAT00000061601	SRPRB	3.17818	6.28389e-15	2.42983e-15	5.99389e-14	1	136636526	136676796	1802
ENSBTAT00000036631	TLN1	5.75328	6.29522e-15	2.43469e-15	6.00115e-14	8	60281244	60312068	7773
ENSBTAT00000055693	RPS13	8.09413	6.30022e-15	2.43469e-15	6.00236e-14	15	35943265	35945982	520
CUFF.14880.1	LOC100301020	22.2352	6.31292e-15	2.43711e-15	6.0109e-14	16	622071	625760	307
ENSBTAT00000008423	PHF5A	5.90277	6.34014e-15	2.44725e-15	6.03325e-14	5	113079627	113088634	904
ENSBTAT00000009410	OS9	5.37402	6.34696e-15	2.44966e-15	6.03617e-14	5	56070693	56104924	2649
ENSBTAT00000057380	ZNF664	5.232	6.39224e-15	2.46364e-15	6.07565e-14	17	53969695	53970480	786
ENSBTAT00000000021	SERINC1	5.26194	6.42608e-15	2.4776e-15	6.10421e-14	9	29081413	29113549	1392
ENSBTAT00000061025	RABGAP1	2.70517	6.43623e-15	2.47999e-15	6.11025e-14	11	94103009	94264248	4928
ENSBTAT00000018273	DDRGK1	3.33594	6.46808e-15	2.4886e-15	6.13687e-14	13	52465223	52475836	1131
ENSBTAT00000043505	APPL2	3.703	6.47271e-15	2.4886e-15	6.13764e-14	5	69039881	69091742	3179
ENSBTAT00000001343	SLC30A5	1.74836	6.52648e-15	2.5102e-15	6.18498e-14	20	10455656	10487640	2787
ENSBTAT00000025063	ATN1	4.04185	6.56296e-15	2.52025e-15	6.2159e-14	5	103881479	103888559	4090
ENSBTAT00000004244	ANK1	15.0157	6.59389e-15	2.53029e-15	6.24152e-14	27	36255859	36265466	790
ENSBTAT00000024161	MRPS18C	6.7208	6.60842e-15	2.53648e-15	6.25159e-14	6	100006745	100011712	482
ENSBTAT00000018741	IDH2	12.54	6.62294e-15	2.53882e-15	6.26121e-14	21	21903847	21920153	1740
ENSBTAT00000022212	PTRH2	4.98814	6.62636e-15	2.54117e-15	6.26121e-14	19	10894828	10903658	857
ENSBTAT00000065612	TIMM17A	6.58321	6.63795e-15	2.54351e-15	6.26848e-14	16	49656493	49667783	704
ENSBTAT00000043569	TPRA1	3.20466	6.64553e-15	2.54584e-15	6.27196e-14	22	60590209	60598690	1265
ENSBTAT00000036476	UBAP1	3.78254	6.65614e-15	2.54818e-15	6.2783e-14	8	76964264	76988252	1711
ENSBTAT00000018329	GPC1	6.45394	6.7048e-15	2.56198e-15	6.32049e-14	3	120383561	120476582	3286
ENSBTAT00000004276	ICT1	6.02834	6.71926e-15	2.56512e-15	6.32819e-14	19	57040855	57047924	874
ENSBTAT00000016780	NAA38	5.50973	6.72083e-15	2.56512e-15	6.32819e-14	4	83517254	83524725	544
ENSBTAT00000016785	CHCHD1	7.0727	6.72493e-15	2.56512e-15	6.32836e-14	28	29850371	29851646	558
ENSBTAT00000050064	PPM1B	7.40816	6.75415e-15	2.57507e-15	6.35214e-14	11	26402682	26427596	1346
ENSBTAT00000006035	OTUD5	3.98667	6.76302e-15	2.57738e-15	6.35677e-14	X	92116549	92142964	1948
ENSBTAT00000022848	SNRPE	3.04024	6.776e-15	2.5835e-15	6.36525e-14	19	43828735	43829232	498
ENSBTAT00000021507	MAPK3	4.07784	6.79309e-15	2.58429e-15	6.37387e-14	25	26437044	26444129	2135
ENSBTAT00000063472	FHOD1	7.19643	6.79014e-15	2.58429e-15	6.37387e-14	18	34977246	34993385	3651
ENSBTAT00000037425	LCMT1	4.62122	6.84222e-15	2.60181e-15	6.41623e-14	25	22964774	23034012	1269
ENSBTAT00000048673	DTNA	6.57616	6.84932e-15	2.60409e-15	6.41914e-14	24	22521988	22766995	1691
ENSBTAT00000047298	CHCHD7	6.93835	7.06605e-15	2.68616e-15	6.61841e-14	14	25052885	25058779	353
ENSBTAT00000012317	ENSBTAT00000012317	22.1802	7.11132e-15	2.69979e-15	6.65694e-14	15	38876122	38876667	546
ENSBTAT00000008749	RALA	3.61351	7.13028e-15	2.70424e-15	6.66693e-14	4	81919125	81929351	724
ENSBTAT00000047742	MNF1	9.61215	7.12767e-15	2.70424e-15	6.66693e-14	23	7758144	7783948	483
ENSBTAT00000032405	ENSBTAT00000032405	4.86918	7.24807e-15	2.74656e-15	6.76921e-14	5	25408218	25408935	669	Uncharacterized protein [Source:UniProtKB/TrEMBL;Acc:G3X7J3]
ENSBTAT00000056731	MRPL41	5.86006	7.24641e-15	2.74656e-15	6.76921e-14	11	105594963	105595605	643
ENSBTAT00000003252	IREB2	3.40876	7.25553e-15	2.74876e-15	6.77225e-14	21	31352398	31401775	3204
ENSBTAT00000055962	ADRBK1	3.86265	7.31852e-15	2.76987e-15	6.82709e-14	29	45844928	45852607	2087
ENSBTAT00000011072	ZFR	2.57869	7.33507e-15	2.77583e-15	6.83857e-14	20	41292933	41350662	3297
ENSBTAT00000002770	SUGT1	6.31928	7.38508e-15	2.79151e-15	6.87723e-14	12	11131393	11172149	1178
ENSBTAT00000043199	SLC35A4	3.79152	7.38223e-15	2.78934e-15	6.87723e-14	7	53424462	53426334	1873
ENSBTAT00000020080	LGALS1	14.9852	7.43812e-15	2.80715e-15	6.91899e-14	5	110014543	110017878	507
ENSBTAT00000023760	USF1	3.23303	7.43853e-15	2.80715e-15	6.91899e-14	3	8455700	8461692	1715
ENSBTAT00000039125	NEXN	14.9232	7.49847e-15	2.82815e-15	6.97072e-14	3	66998944	67053966	2181
ENSBTAT00000019282	NGRN	5.16931	7.5064e-15	2.83029e-15	6.97406e-14	21	22060138	22066205	1369
ENSBTAT00000031821	UBL5	12.085	7.52342e-15	2.83242e-15	6.98584e-14	1	154150028	154150249	222
ENSBTAT00000018089	VEGFB	6.92708	7.54089e-15	2.83668e-15	6.994e-14	29	43155196	43157756	1024
ENSBTAT00000026068	NCOA4	5.16857	7.53694e-15	2.83668e-15	6.994e-14	28	44419336	44441664	3489
ENSBTAT00000015810	BLOC1S1	10.6326	7.60491e-15	2.85761e-15	7.04932e-14	5	57863517	57866922	560
ENSBTAT00000025691	MDH1	13.9061	7.61524e-15	2.86348e-15	7.05484e-14	11	61970467	61994479	1269
ENSBTAT00000004772	GNL3L	5.11946	7.63305e-15	2.86559e-15	7.06709e-14	X	97432890	97461194	1985
ENSBTAT00000024518	NCK1	2.68677	7.63725e-15	2.86605e-15	7.06709e-14	1	133319427	133395740	1764
ENSBTAT00000014167	LMO7	5.6368	7.64453e-15	2.86605e-15	7.06976e-14	12	51141568	51245841	5446
ENSBTAT00000020305	SDHAF2	7.36713	7.65748e-15	2.8719e-15	7.07768e-14	29	40616949	40626477	1188
ENSBTAT00000012391	PSMC4	6.3011	7.72774e-15	2.89648e-15	7.13851e-14	18	49688182	49699038	1417
ENSBTAT00000049219	EIF3F	9.39676	7.73806e-15	2.89857e-15	7.14395e-14	15	45130568	45138822	1221
ENSBTAT00000001360	ARID1A	2.51549	7.77138e-15	2.90814e-15	7.1706e-14	2	127000106	127066994	6339
ENSBTAT00000010765	CCT6A	5.21145	7.79255e-15	2.91395e-15	7.18601e-14	25	27985731	27993651	1694
ENSBTAT00000017450	ACBD3	2.61297	7.82845e-15	2.92724e-15	7.21499e-14	16	29911424	29949907	3898
ENSBTAT00000001991	MRPL24	6.33197	7.86615e-15	2.94051e-15	7.24559e-14	3	14141433	14146444	832
ENSBTAT00000053463	CAB39	8.62877	7.88846e-15	2.9463e-15	7.26198e-14	2	119340636	119443035	3855
CUFF.20810.1	UNANNOTATED	191.677	7.97114e-15	2.97447e-15	7.3339e-14	2	3313919	3313986	68	Cytochrome c oxidase subunit 2[Source:UniProtKB/TrEMBL;Acc:COX2]
ENSBTAT00000021731	THEM2	6.43594	8.03806e-15	2.99717e-15	7.39045e-14	23	32835596	32849025	1759
ENSBTAT00000026074	CD151	8.3137	8.04178e-15	2.99717e-15	7.39045e-14	29	50695518	50700467	1608
ENSBTAT00000035341	ING1	4.59506	8.05976e-15	3.00291e-15	7.40275e-14	12	89339068	89339790	723
ENSBTAT00000065657	CLASP1	2.60985	8.07261e-15	3.00492e-15	7.41033e-14	2	73490617	73723487	5074
ENSBTAT00000002508	PDIA6	4.14885	8.08507e-15	3.00894e-15	7.41754e-14	11	86834898	86857648	1787
ENSBTAT00000022759	PHB	6.3703	8.09401e-15	3.00894e-15	7.42151e-14	19	37828780	37839397	1023
ENSBTAT00000006464	RNF167	3.12273	8.11313e-15	3.01466e-15	7.43481e-14	19	27085162	27087524	1054
ENSBTAT00000001868	FBXO11	3.18867	8.14425e-15	3.02409e-15	7.45907e-14	11	29989995	30101580	2134
ENSBTAT00000047532	CAPN2	6.60374	8.15919e-15	3.0298e-15	7.46852e-14	16	27781671	27840009	3179
ENSBTAT00000011523	PDK2	5.13192	8.19086e-15	3.03921e-15	7.49324e-14	19	37177685	37193942	2267
ENSBTAT00000011818	USP22	6.45171	8.28066e-15	3.07086e-15	7.57109e-14	19	35728070	35746498	4123
ENSBTAT00000010044	HOOK3	4.68392	8.29535e-15	3.07653e-15	7.58022e-14	27	37278344	37358417	2653
ENSBTAT00000014665	MRPS36	10.6251	8.34619e-15	3.09331e-15	7.62235e-14	20	10390982	10399140	428
ENSBTAT00000027919	RASSF1	3.58853	8.35877e-15	3.0935e-15	7.62767e-14	22	50580394	50586504	1695
ENSBTAT00000061583	ENSBTAT00000061583	3.79006	8.36149e-15	3.0935e-15	7.62767e-14	25	26968647	26970732	1733
ENSBTAT00000064744	PNKD	6.7215	8.38653e-15	3.10285e-15	7.64618e-14	18	46516557	46516985	429
ENSBTAT00000003999	ACADVL	12.1294	8.43881e-15	3.11605e-15	7.68244e-14	19	27568181	27573378	2137
ENSBTAT00000017489	NF2	4.23818	8.44e-15	3.11605e-15	7.68244e-14	17	70895108	70966968	1980
ENSBTAT00000021658	PREP	6.29944	8.44062e-15	3.11605e-15	7.68244e-14	9	45169675	45301623	2117
ENSBTAT00000002583	MAP7D1	8.51441	8.472e-15	3.12535e-15	7.70664e-14	3	110233982	110243621	2317
ENSBTAT00000015924	PPIA	5.80845	8.49859e-15	3.13112e-15	7.71775e-14	4	77409433	77413143	519
ENSBTAT00000022030	SEC63	2.9591	8.49577e-15	3.13112e-15	7.71775e-14	9	42651150	42718789	3371
ENSBTAT00000027190	ZMYM2	2.97823	8.49103e-15	3.13097e-15	7.71775e-14	12	36391824	36453989	4236
ENSBTAT00000007220	CCNY	4.69406	8.51185e-15	3.13303e-15	7.72544e-14	13	18359845	18395890	1475
ENSBTAT00000027371	BCL7B	3.96337	8.53081e-15	3.13863e-15	7.73829e-14	25	34163444	34181192	1598
ENSBTAT00000004410	ACTR3	4.10641	8.59361e-15	3.15893e-15	7.79086e-14	2	65892592	65912704	1253
ENSBTAT00000008082	DHX36	1.87665	8.60362e-15	3.16082e-15	7.79555e-14	1	114236034	114281045	3549
ENSBTAT00000002609	SNX1	5.89125	8.63861e-15	3.17195e-15	7.82285e-14	10	45899489	45933197	1987
ENSBTAT00000013952	ENSBTAT00000013952	5.29186	8.64484e-15	3.17195e-15	7.82409e-14	18	14983396	14983970	575
ENSBTAT00000024551	RABGGTB	6.9142	8.68582e-15	3.18852e-15	7.85676e-14	3	69316067	69322906	1150
ENSBTAT00000020671	ERI3	3.35617	8.73883e-15	3.20506e-15	7.90028e-14	3	102290329	102421170	1687
ENSBTAT00000043836	SMTNL1	10.3829	8.75706e-15	3.21059e-15	7.91232e-14	15	82114216	82122724	1350
ENSBTAT00000033124	SRSF7	5.45499	8.78388e-15	3.21612e-15	7.9321e-14	11	21105343	21110797	1056
ENSBTAT00000063623	MYPN	8.17177	8.85247e-15	3.23994e-15	7.98956e-14	28	24797318	24833215	2948
ENSBTAT00000027499	VPS45	2.62606	8.88183e-15	3.24911e-15	8.01156e-14	3	20534021	20600696	2667
ENSBTAT00000023595	IL6ST	4.3478	8.94522e-15	3.27288e-15	8.06422e-14	20	23212633	23270316	2977
ENSBTAT00000017497	HSPA8	20.1506	8.95631e-15	3.27471e-15	8.0697e-14	15	34216278	34220705	2256
ENSBTAT00000028236	MRPL16	5.69791	9.02037e-15	3.29479e-15	8.12287e-14	15	84347033	84351272	986
ENSBTAT00000026421	MRPS11	3.46071	9.06302e-15	3.30755e-15	8.15672e-14	21	19867700	19898710	903
ENSBTAT00000011521	ALDH2	12.3168	9.10663e-15	3.32395e-15	8.19139e-14	17	64551612	64577901	2041
ENSBTAT00000000606	POLR2H	1.89009	9.14753e-15	3.33668e-15	8.22358e-14	1	83437865	83442294	1894
ENSBTAT00000039221	PDPK1	2.54247	9.16137e-15	3.33846e-15	8.23143e-14	25	2062819	2097196	1799
ENSBTAT00000003377	FKBP3	11.7368	9.1683e-15	3.34024e-15	8.23306e-14	21	55325021	55335301	1012
ENSBTAT00000042618	CYB5R3	9.70448	9.22364e-15	3.35658e-15	8.27814e-14	5	114009261	114024565	1899
ENSBTAT00000006554	MRS2	2.77273	9.2457e-15	3.36563e-15	8.29331e-14	23	33038551	33077190	3647
ENSBTAT00000036128	URM1	2.39206	9.27259e-15	3.37103e-15	8.31281e-14	11	98978450	98995209	2318
ENSBTAT00000007680	REXO2	6.02553	9.34122e-15	3.39459e-15	8.36967e-14	15	25293299	25304051	1083
ENSBTAT00000002707	CDC34	14.7357	9.35499e-15	3.39634e-15	8.37734e-14	7	44789108	44794947	790
ENSBTAT00000045065	GNB1	5.67836	9.37292e-15	3.40171e-15	8.38873e-14	16	52106960	52184132	2939
ENSBTAT00000003250	CUEDC2	4.18583	9.39051e-15	3.40519e-15	8.39515e-14	26	22919818	22921523	982
ENSBTAT00000022178	ETFDH	6.42473	9.38981e-15	3.40519e-15	8.39515e-14	17	41262754	41307126	2235
ENSBTAT00000021518	LMBRD1	3.58994	9.44614e-15	3.42504e-15	8.4402e-14	9	8819655	8953828	1994
ENSBTAT00000005727	NFATC3	4.12418	9.50512e-15	3.44297e-15	8.48422e-14	18	35640709	35732176	3647
ENSBTAT00000008726	SPCS2	5.21409	9.50595e-15	3.44297e-15	8.48422e-14	15	54998958	55022311	902
ENSBTAT00000019792	GPC	10.2638	9.59286e-15	3.47001e-15	8.55705e-14	2	79255849	79304396	920
ENSBTAT00000022789	AK3	4.93028	9.65392e-15	3.48979e-15	8.60674e-14	8	40047897	40069800	3631
ENSBTAT00000003572	ANKRD12	2.75564	9.6652e-15	3.49508e-15	8.61203e-14	24	41913310	41975447	6398
ENSBTAT00000012485	TMEM223	5.26809	9.92385e-15	3.58346e-15	8.8376e-14	29	41795548	41796692	745
ENSBTAT00000001474	PRKD3	2.82147	9.96894e-15	3.59953e-15	8.87285e-14	11	19704351	19780728	2773
ENSBTAT00000010269	MTPN	3.42996	1.00487e-14	3.60837e-15	8.93894e-14	4	100550308	100626568	1328
ENSBTAT00000061554	KDM2A	2.83162	1.00567e-14	3.64043e-15	8.94111e-14	29	45781503	45822098	3639
ENSBTAT00000011424	EIF2B2	3.85434	1.00991e-14	3.64043e-15	8.97383e-14	10	86654324	86661342	1480
ENSBTAT00000007950	NMT1	5.03709	1.02397e-14	3.67242e-15	9.08873e-14	19	45375505	45406315	2060
ENSBTAT00000009887	PGAM5	4.26345	1.02346e-14	3.67242e-15	9.08873e-14	17	45491537	45499180	1823
ENSBTAT00000019139	CLK2	2.34394	1.02506e-14	3.70026e-15	9.09337e-14	3	15422624	15431541	2125
ENSBTAT00000008416	EDC4	2.11897	1.02793e-14	3.70026e-15	9.1138e-14	18	35493612	35504658	4668
ENSBTAT00000023029	SUMO3	6.00731	1.02861e-14	3.70026e-15	9.11483e-14	1	145031789	145041320	1602
ENSBTAT00000017240	FLJ10803	3.86388	1.03189e-14	3.70026e-15	9.13891e-14	4	78141987	78147625	969
ENSBTAT00000027175	MARF1	2.06995	1.03744e-14	3.73003e-15	9.18296e-14	25	14138542	14171367	5418
ENSBTAT00000001246	PLEKHB2	6.13645	1.04297e-14	3.73003e-15	9.22179e-14	2	1850107	1899289	3381
ENSBTAT00000010787	PRKCSH	3.47198	1.04263e-14	3.73003e-15	9.22179e-14	7	17034684	17048121	2102
ENSBTAT00000000085	ADSL	9.01398	1.04941e-14	3.7597e-15	9.27361e-14	5	112192430	112209091	1558
ENSBTAT00000044005	ENSBTAT00000044005	6.75614	1.05047e-14	3.7597e-15	9.27794e-14	3	61240417	61241633	846	Uncharacterized protein [Source:UniProtKB/TrEMBL;Acc:F1MYC4]
ENSBTAT00000028239	EHD2	8.80224	1.05395e-14	3.7597e-15	9.30356e-14	18	55071102	55087454	3003
ENSBTAT00000008060	HUWE1	3.12999	1.05561e-14	3.79343e-15	9.31311e-14	X	96362880	96520246	14016
ENSBTAT00000001576	AP1B1	3.37067	1.06512e-14	3.82084e-15	9.39186e-14	17	70734993	70783359	3949
ENSBTAT00000017372	IGF2	7.52434	1.06582e-14	3.82084e-15	9.39285e-14	29	50046626	50065230	3795
ENSBTAT00000023484	ENSBTAT00000023484	6.13064	1.07059e-14	3.82084e-15	9.42564e-14	1	136947203	136961387	3364	Bos taurus CDV3 homolog (mouse) (CDV3), mRNA. [Source:RefSeq mRNA;Acc:NM_11924]
ENSBTAT00000023729	RXRA	6.94509	1.07071e-14	3.82084e-15	9.42564e-14	11	105990344	106015000	1539
ENSBTAT00000053880	CSNK1D	3.21996	1.07533e-14	3.85234e-15	9.46114e-14	19	51207151	51241060	3505
ENSBTAT00000008177	IDH3A	9.35786	1.07797e-14	3.85234e-15	9.47922e-14	21	31063699	31079936	1758
ENSBTAT00000014074	MEF2A	3.64534	1.0859e-14	3.88165e-15	9.5437e-14	21	7045098	7225412	5552
ENSBTAT00000054742	TMSB4X	9.30071	1.09362e-14	3.88165e-15	9.60635e-14	14	38614593	38615161	569
ENSBTAT00000022455	VPS26A	3.39484	1.09431e-14	3.88165e-15	9.60716e-14	28	25683639	25708826	2663
ENSBTAT00000022287	ZSCAN21	3.1136	1.09649e-14	3.91086e-15	9.62102e-14	25	36924066	36931834	1943
ENSBTAT00000056287	NMNAT1	4.25311	1.10114e-14	3.91086e-15	9.65659e-14	16	44457295	44462940	963
ENSBTAT00000054165	CDH13	7.61313	1.10452e-14	3.91086e-15	9.68096e-14	18	9512739	10162782	2004
ENSBTAT00000020114	GADD45GIP1	7.51036	1.10693e-14	3.93998e-15	9.69677e-14	7	13721214	13723683	730
ENSBTAT00000005078	VAMP2	5.13585	1.11055e-14	3.93998e-15	9.71793e-14	19	28408302	28410747	765
ENSBTAT00000008734	HRMT1L2	7.88967	1.11025e-14	3.93998e-15	9.71793e-14	18	56534833	56545053	1308
ENSBTAT00000026409	DHX9	3.40178	1.12035e-14	3.97116e-15	9.79834e-14	16	65379390	65420803	4528
CUFF.14887.1	UNANNOTATED	146.006	1.12552e-14	3.99145e-15	9.82578e-14	16	624505	624593	89	Cytochrome c oxidase subunit 2[Source:UniProtKB/TrEMBL;Acc:COX2]
ENSBTAT00000001404	SRPK3	8.16033	1.12553e-14	3.99145e-15	9.82578e-14	X	39912160	39916763	2001
ENSBTAT00000006109	PWP1	2.72276	1.12432e-14	3.97116e-15	9.82578e-14	5	71280815	71300027	1873
ENSBTAT00000020356	SMARCE1	3.10365	1.12593e-14	3.99145e-15	9.82578e-14	19	41488358	41510910	2390
ENSBTAT00000017939	BNIP2	2.78347	1.12896e-14	3.99145e-15	9.8469e-14	10	50628361	50650638	1798
ENSBTAT00000008363	NHP2	5.5138	1.13076e-14	3.99145e-15	9.85576e-14	7	40601549	40605473	736
ENSBTAT00000061249	AFTPH	2.60045	1.1312e-14	3.99145e-15	9.85576e-14	11	62911414	62951512	3787
ENSBTAT00000012434	ATP5SL	4.19426	1.1342e-14	3.99145e-15	9.87655e-14	18	50845592	50850432	810
ENSBTAT00000008243	CGI-119	6.9843	1.13983e-14	4.02242e-15	9.91488e-14	5	47877715	47894116	2337
ENSBTAT00000034015	SLC39A1	3.31176	1.13951e-14	4.02242e-15	9.91488e-14	3	16530784	16534816	2052
ENSBTAT00000013264	FAM53C	4.1186	1.14904e-14	4.04896e-15	9.98956e-14	7	51349485	51358857	4065
ENSBTAT00000009959	NDUFAF6	3.23341	1.15082e-14	4.04896e-15	9.99966e-14	14	71606359	71642582	2423
ENSBTAT00000019138	ACTR10	5.09409	1.15308e-14	4.04896e-15	1.00139e-13	10	70761697	70788174	1553
ENSBTAT00000018479	COL6A3	7.53715	1.15469e-14	4.04896e-15	1.00224e-13	3	117409071	117482330	10030
ENSBTAT00000024531	RRAGD	7.96509	1.15548e-14	4.071e-15	1.00239e-13	9	61644457	61743739	1755
ENSBTAT00000015615	PSEN1	2.27014	1.15645e-14	4.071e-15	1.00269e-13	10	85006250	85073421	2708
ENSBTAT00000011605	PFDN4	8.32801	1.16009e-14	4.071e-15	1.00531e-13	13	82399773	82402817	660
ENSBTAT00000010698	ENSBTAT00000010698	16.1959	1.16317e-14	4.071e-15	1.00689e-13	5	75519790	75520044	255	Uncharacterized protein [Source:UniProtKB/TrEMBL;Acc:F1MFF5]
ENSBTAT00000016117	HOXC8	4.97654	1.16259e-14	4.071e-15	1.00689e-13	5	26180271	26182515	851
ENSBTAT00000012872	ACTR2	3.56269	1.164e-14	4.071e-15	1.00707e-13	11	63552997	63591980	2680
ENSBTAT00000008756	NAA25	2.02322	1.16579e-14	4.0929e-15	1.00808e-13	17	64361788	64413468	3055
CUFF.48534.1	PTP4A1	5.27762	1.16919e-14	4.0929e-15	1.01047e-13	9	507538	517515	2749
ENSBTAT00000015668	COL6A1	10.7663	1.1699e-14	4.0929e-15	1.01055e-13	1	147404396	147423644	4069
ENSBTAT00000006343	YIF1A	5.43705	1.17158e-14	4.0929e-15	1.01145e-13	29	44984659	44988709	1103
ENSBTAT00000002684	STAU2	6.07359	1.17323e-14	4.0929e-15	1.01233e-13	14	38927061	39070664	898
ENSBTAT00000020105	TOB2	7.79698	1.17414e-14	4.0929e-15	1.01258e-13	5	113060940	113070989	4344
ENSBTAT00000061493	UPF2	3.22388	1.18447e-14	4.12567e-15	1.02094e-13	13	12363666	12452723	3842
ENSBTAT00000003519	GMPR2	2.90453	1.18817e-14	4.1584e-15	1.02358e-13	10	20769369	20774149	819
ENSBTAT00000017860	GLRX5	6.76729	1.19568e-14	4.18887e-15	1.0295e-13	21	61986090	61996011	1045
ENSBTAT00000005773	SLMO2	4.97099	1.20159e-14	4.18887e-15	1.03403e-13	13	57855967	57864630	1376
ENSBTAT00000009433	ZMYM5	2.42708	1.20593e-14	4.21027e-15	1.03666e-13	12	36493992	36520152	2941
ENSBTAT00000009899	STX4	4.34376	1.20544e-14	4.21027e-15	1.03666e-13	25	27413137	27418925	1304
ENSBTAT00000039788	GOLGA7	3.34855	1.20662e-14	4.21027e-15	1.03671e-13	27	36108533	36125175	1833
ENSBTAT00000028798	CDC42EP1	5.01653	1.20835e-14	4.21027e-15	1.03763e-13	5	109925709	109933537	2096
ENSBTAT00000008092	ENSBTAT00000008092	8.31449	1.21287e-14	4.21027e-15	1.04041e-13	4	84628122	84628559	438
ENSBTAT00000013953	PSMG2	4.3372	1.21239e-14	4.21027e-15	1.04041e-13	24	43515583	43525527	974
ENSBTAT00000014056	BVES	4.01117	1.22323e-14	4.24281e-15	1.04873e-13	9	45484429	45522649	1083
ENSBTAT00000015348	AMPD1	12.0008	1.22753e-14	4.27076e-15	1.05186e-13	3	28756908	28768496	1863
ENSBTAT00000039411	SNX5	4.92334	1.2301e-14	4.27076e-15	1.0535e-13	13	38519143	38543948	2014
ENSBTAT00000010138	SHOC2	2.0746	1.23376e-14	4.27076e-15	1.05607e-13	26	31762792	31849699	3925
ENSBTAT00000009822	MIB1	3.23558	1.2448e-14	4.3032e-15	1.06496e-13	24	34812337	34901981	3031
ENSBTAT00000021435	OTUD7B	3.18806	1.24861e-14	4.33329e-15	1.06765e-13	3	20656593	20712080	2828
ENSBTAT00000002594	TIMM8B	9.57921	1.25103e-14	4.33329e-15	1.06915e-13	15	22720233	22722218	507
ENSBTAT00000064412	DNAJB9	3.42918	1.25554e-14	4.3564e-15	1.07244e-13	4	59970936	59973819	1967
ENSBTAT00000015654	MED14	1.52624	1.2577e-14	4.3564e-15	1.07371e-13	X	108241636	108301567	4896
ENSBTAT00000020111	CALR	8.54175	1.25972e-14	4.3564e-15	1.0743e-13	7	13731958	13735788	1914
ENSBTAT00000026056	FBP2	18.5962	1.25954e-14	4.3564e-15	1.0743e-13	8	82396095	82438817	1281
ENSBTAT00000064986	UBFD1	6.28745	1.26114e-14	4.3564e-15	1.07494e-13	25	21476163	21488221	1187
ENSBTAT00000017696	RBMX	6.47469	1.26705e-14	4.38401e-15	1.07941e-13	X	20457677	20462728	1500
ENSBTAT00000002165	SYF2	3.59637	1.27336e-14	4.38401e-15	1.08387e-13	2	128320057	128325052	923
ENSBTAT00000029455	PINK1	11.2481	1.27363e-14	4.38401e-15	1.08387e-13	2	132601302	132621738	2954
ENSBTAT00000012168	PIK3CA	2.28002	1.27605e-14	4.41387e-15	1.08535e-13	1	88504290	88533061	3208
ENSBTAT00000061322	PBX2	3.58873	1.27703e-14	4.41387e-15	1.08561e-13	23	27003269	27006749	1313
ENSBTAT00000019285	FBXO40	9.0598	1.28525e-14	4.43664e-15	1.09202e-13	1	66712457	66717255	2136
ENSBTAT00000027498	FBXO7	1.77498	1.28649e-14	4.43664e-15	1.09249e-13	5	71448944	71469170	3354
ENSBTAT00000023727	NFIC	8.42278	1.28735e-14	4.43664e-15	1.09266e-13	7	21676708	21748618	1616
ENSBTAT00000008196	MORG1	3.28414	1.29139e-14	4.43664e-15	1.09551e-13	7	13935137	13939754	1155
ENSBTAT00000016607	DYRK1B	6.21289	1.29234e-14	4.43664e-15	1.09573e-13	18	49650522	49658124	2500
ENSBTAT00000064341	C15orf52	3.73042	1.29876e-14	4.46163e-15	1.1006e-13	10	36068634	36074651	1949
ENSBTAT00000019602	MRPL51	4.31106	1.30368e-14	4.46163e-15	1.10368e-13	5	104273438	104276752	2815
ENSBTAT00000054061	PSTPIP2	6.90842	1.30377e-14	4.46163e-15	1.10368e-13	24	46196113	46290465	2628
ENSBTAT00000030275	EIF5	10.18	1.30464e-14	4.46163e-15	1.10384e-13	21	69638191	69647505	4372
ENSBTAT00000028053	ACTR1A	5.90764	1.31651e-14	4.52314e-15	1.11329e-13	26	22961816	22978156	2911
ENSBTAT00000007361	HOXC9	3.20354	1.31924e-14	4.52314e-15	1.11501e-13	5	26188849	26191440	871
ENSBTAT00000019575	RAP1A	8.83509	1.32402e-14	4.52314e-15	1.11847e-13	3	31746448	31764423	620
ENSBTAT00000022820	RNF216	2.52431	1.33111e-14	4.55502e-15	1.12387e-13	25	39160895	39279504	3278
ENSBTAT00000022768	NUP153	2.51631	1.3387e-14	4.58686e-15	1.12968e-13	23	39534812	39605632	4778
ENSBTAT00000007226	RPRD1A	2.61425	1.34707e-14	4.61625e-15	1.13568e-13	24	21361884	21427671	972
ENSBTAT00000034028	DHRS3	7.21984	1.34721e-14	4.61625e-15	1.13568e-13	16	41985339	42040600	761
ENSBTAT00000009378	ENSBTAT00000009378	8.23532	1.35554e-14	4.64073e-15	1.1421e-13	2	116645761	116647392	1632
ENSBTAT00000025024	RPS4	7.30381	1.35917e-14	4.64073e-15	1.14456e-13	X	83532034	83536488	905
ENSBTAT00000001720	HSPB8	20.0951	1.3621e-14	4.64073e-15	1.14643e-13	17	58405437	58418688	1906
ENSBTAT00000014270	NDUFAF1	4.17141	1.36412e-14	4.64073e-15	1.14753e-13	10	36938124	36948842	1247
ENSBTAT00000001309	PSMA2	3.69835	1.36573e-14	4.66753e-15	1.14829e-13	4	78821820	78832470	1439
ENSBTAT00000009419	TSPAN31	4.58498	1.37063e-14	4.66753e-15	1.1518e-13	5	56042459	56045159	988
ENSBTAT00000033431	NFIA	2.71103	1.37301e-14	4.66753e-15	1.1532e-13	3	84749656	85167847	2328
ENSBTAT00000000316	POLE3	5.96503	1.37713e-14	4.69426e-15	1.15606e-13	8	104356462	104359086	1904
ENSBTAT00000023331	ENSBTAT00000023331	6.41996	1.38018e-14	4.69426e-15	1.15802e-13	19	12844738	12845367	630	Uncharacterized protein [Source:UniProtKB/TrEMBL;Acc:G3MZG7]
ENSBTAT00000008186	INTS3	2.64309	1.38209e-14	4.69426e-15	1.15901e-13	3	16685041	16724703	4705
ENSBTAT00000017326	CCNDBP1	4.69387	1.38554e-14	4.71844e-15	1.1613e-13	10	38507733	38518176	2350
ENSBTAT00000013577	MAPKAP1	3.16157	1.38928e-14	4.71844e-15	1.16383e-13	11	96278654	96511560	2294
ENSBTAT00000017243	FAM53B	5.76139	1.39209e-14	4.71844e-15	1.16557e-13	26	44619642	44693891	1376
ENSBTAT00000013675	VPS37A	3.25398	1.39387e-14	4.71844e-15	1.16646e-13	27	19018677	19052353	2684
ENSBTAT00000009208	SPTBN1	9.27578	1.39804e-14	4.74499e-15	1.16934e-13	11	37030009	37241384	8298
ENSBTAT00000018461	PTDSS1	3.79692	1.40014e-14	4.74499e-15	1.17049e-13	14	70236070	70303427	2422
ENSBTAT00000024128	PPM1A	7.68864	1.40209e-14	4.74499e-15	1.17151e-13	10	72757582	72768778	2034
ENSBTAT00000004562	DCN	13.9499	1.41141e-14	4.77641e-15	1.17869e-13	5	21080013	21119087	2141
ENSBTAT00000004154	ENSBTAT00000004154	6.94304	1.4179e-14	4.80281e-15	1.1835e-13	5	102100648	102101142	495
ENSBTAT00000055617	RAD52	5.5113	1.42375e-14	4.80281e-15	1.18776e-13	5	108209684	108235391	1795
ENSBTAT00000004717	ALKBH4	4.60103	1.42466e-14	4.80281e-15	1.1879e-13	25	35102455	35109898	1213
ENSBTAT00000010628	SEL1L	3.33666	1.43714e-14	4.8629e-15	1.19769e-13	10	93904711	93965166	2523
ENSBTAT00000063331	RHOB	8.37707	1.44104e-14	4.8629e-15	1.20032e-13	11	78464206	78466417	2212
ENSBTAT00000003506	MRPL42	4.28365	1.44475e-14	4.8629e-15	1.20279e-13	5	23426161	23456891	767
ENSBTAT00000027882	HCFC2	2.19604	1.45983e-14	4.92789e-15	1.21471e-13	5	68052161	68097172	5408
ENSBTAT00000046355	OCIAD1	8.15108	1.47586e-14	4.99282e-15	1.22741e-13	6	69144752	69167276	1342
ENSBTAT00000021109	UBE2J2	4.18728	1.51332e-14	5.08614e-15	1.25727e-13	16	52441615	52449785	1160
ENSBTAT00000027927	MPC2	11.2202	1.51254e-14	5.08614e-15	1.25727e-13	3	768307	799012	762
ENSBTAT00000006102	RHEB	5.92937	1.51415e-14	5.08614e-15	1.25731e-13	4	114803157	114855282	1029
ENSBTAT00000001290	IARS	3.24673	1.5201e-14	5.10665e-15	1.25979e-13	8	85268890	85350117	4354
ENSBTAT00000005092	CREBBP	2.7974	1.51896e-14	5.10665e-15	1.25979e-13	25	3050214	3169185	8515
ENSBTAT00000020818	KARS	7.57941	1.52036e-14	5.10665e-15	1.25979e-13	18	2962722	2976537	2171
ENSBTAT00000027592	SVIL	12.4228	1.52105e-14	5.10665e-15	1.25979e-13	13	34922199	34945103	2760
ENSBTAT00000028671	DNPEP	4.71188	1.51956e-14	5.10665e-15	1.25979e-13	2	108029961	108042198	1501
ENSBTAT00000044498	ENSBTAT00000044498	6.6933	1.53266e-14	5.13761e-15	1.26876e-13	3	36546817	36547268	452
ENSBTAT00000021524	APLP2	7.26199	1.54129e-14	5.16853e-15	1.27524e-13	29	36878509	36906465	2378
ENSBTAT00000010013	BBS4	2.9142	1.54901e-14	5.19675e-15	1.28098e-13	10	19317484	19363592	2259
ENSBTAT00000064219	FAM32A	4.63973	1.55268e-14	5.19675e-15	1.28336e-13	7	7854536	7861328	1428
ENSBTAT00000008517	PIP4K2B	6.59287	1.5578e-14	5.22759e-15	1.28692e-13	19	39995184	40017502	1283
ENSBTAT00000025736	TRMT1	2.33242	1.56524e-14	5.25571e-15	1.29241e-13	7	13572878	13581965	2099
ENSBTAT00000022472	HERPUD1	7.14376	1.57156e-14	5.25571e-15	1.29696e-13	18	25048853	25059249	1358
ENSBTAT00000018321	UBALD2	5.9717	1.57883e-14	5.28377e-15	1.30229e-13	19	56072684	56078553	786
ENSBTAT00000021386	ARF4	6.26251	1.58057e-14	5.28377e-15	1.30306e-13	22	44150604	44169288	876
ENSBTAT00000016410	ANP32A	3.98057	1.58942e-14	5.31449e-15	1.30969e-13	10	15589747	15629076	2061
ENSBTAT00000017626	ENSBTAT00000017626	3.43595	1.59794e-14	5.33699e-15	1.31536e-13	7	20843768	20861798	2283	Bos taurus hepatomaderived growth factorrelated protein 2 (HDGFRP2), mRNA. [Source:RefSeq mRNA;Acc:NM_115361]
ENSBTAT00000038842	ASB11	5.15134	1.5978e-14	5.33699e-15	1.31536e-13	X	135436138	135465103	1445
ENSBTAT00000027322	CDK2AP1	7.04492	1.6019e-14	5.33699e-15	1.31795e-13	17	54556011	54566572	1383
ENSBTAT00000005688	MRPL21	6.76137	1.60292e-14	5.33699e-15	1.31811e-13	29	46913943	46923884	688
ENSBTAT00000016319	REPS1	3.07496	1.60996e-14	5.36761e-15	1.32322e-13	9	77666178	77757440	2727
ENSBTAT00000020886	PSMC6	4.31079	1.61764e-14	5.38994e-15	1.32886e-13	10	11401913	11425951	1588
ENSBTAT00000015866	SEC11C	4.13408	1.61947e-14	5.38994e-15	1.32968e-13	24	58659025	58670236	796
ENSBTAT00000015441	ATP2C1	4.47821	1.62102e-14	5.38994e-15	1.33028e-13	1	140368053	140522639	3203
ENSBTAT00000027325	SBNO1	2.05879	1.62309e-14	5.38994e-15	1.33129e-13	17	54487205	54537980	4317
ENSBTAT00000004245	NDUFA10	9.34212	1.62734e-14	5.42045e-15	1.3341e-13	3	119779215	119794481	844
ENSBTAT00000014266	GNPAT	4.52542	1.64135e-14	5.45093e-15	1.34491e-13	28	3378608	3418245	2342
ENSBTAT00000022470	CYFIP1	2.89472	1.64657e-14	5.47859e-15	1.34844e-13	2	996692	1104749	3915
ENSBTAT00000038690	ARHGAP5	2.41395	1.64734e-14	5.47859e-15	1.34844e-13	21	42937760	43000529	4265
ENSBTAT00000004752	HSPBP1	3.14813	1.66257e-14	5.50899e-15	1.36022e-13	18	62643396	62653550	1619
ENSBTAT00000001121	NDRG2	14.5719	1.66652e-14	5.53374e-15	1.36275e-13	10	26134842	26142255	1175
ENSBTAT00000017007	SRP19	4.99984	1.66758e-14	5.53374e-15	1.36293e-13	10	1102150	1110236	858
ENSBTAT00000011714	DHX15	3.82203	1.67056e-14	5.53374e-15	1.36467e-13	6	45629617	45683587	2972
ENSBTAT00000025496	CCT2	6.93927	1.68069e-14	5.56406e-15	1.37225e-13	5	44100435	44116239	1928
ENSBTAT00000038585	XPOT	3.15374	1.70294e-14	5.62459e-15	1.38972e-13	5	49550765	49587910	2964
ENSBTAT00000063767	EGLN1	6.9777	1.70411e-14	5.62459e-15	1.38996e-13	28	3273926	3274777	717
ENSBTAT00000022744	HSPG2	7.04722	1.71003e-14	5.65481e-15	1.39409e-13	2	131517579	131587498	13423
ENSBTAT00000019738	MRPL52	4.99615	1.72725e-14	5.71227e-15	1.40741e-13	10	21816260	21821165	781
ENSBTAT00000017516	SMYD2	7.00892	1.72991e-14	5.71227e-15	1.40887e-13	16	70760234	70813706	1673
ENSBTAT00000059753	Y_RNA	22.7445	1.73337e-14	5.71227e-15	1.41097e-13	10	12405973	12406080	108
ENSBTAT00000000527	HGS	3.41672	1.74047e-14	5.73949e-15	1.41532e-13	19	51733073	51746201	2952
ENSBTAT00000007185	FXR2	7.43321	1.73994e-14	5.73949e-15	1.41532e-13	19	27932717	27940208	2053
ENSBTAT00000014875	ZNF644	2.21097	1.74777e-14	5.76665e-15	1.42053e-13	3	52413191	52508199	5185
ENSBTAT00000012530	EIF4E	5.76512	1.74946e-14	5.76665e-15	1.4212e-13	6	27042237	27080766	1637
ENSBTAT00000027202	UFL1	3.44418	1.7595e-14	5.79375e-15	1.42863e-13	9	54038474	54104380	2474
ENSBTAT00000048797	GNG11	7.20785	1.7625e-14	5.79375e-15	1.43034e-13	3	5454661	5455256	596
ENSBTAT00000013994	THRAP3	6.34495	1.76818e-14	5.82081e-15	1.43423e-13	3	110137251	110208496	3057
ENSBTAT00000021683	GPD1	15.491	1.7747e-14	5.82081e-15	1.4388e-13	5	29958501	29964085	1626
ENSBTAT00000009715	VAT1	3.60883	1.77785e-14	5.84486e-15	1.44062e-13	19	43687403	43694870	2725
ENSBTAT00000017848	MARK3	4.16774	1.7821e-14	5.84486e-15	1.44334e-13	21	69696108	69791011	2531
ENSBTAT00000033470	ACADM	6.24509	1.78473e-14	5.84486e-15	1.44475e-13	3	69344157	69382504	2128
ENSBTAT00000065988	ENSBTAT00000065988	16.7542	1.78799e-14	5.8718e-15	1.44665e-13	4	94432194	94432409	216	Uncharacterized protein [Source:UniProtKB/TrEMBL;Acc:G3MXE1]
ENSBTAT00000047703	EEA1	2.32106	1.79247e-14	5.8718e-15	1.44955e-13	5	22806703	22884689	3567
ENSBTAT00000024364	SETD3	5.93494	1.81701e-14	5.95823e-15	1.46866e-13	21	66064391	66125305	1902
ENSBTAT00000032713	PPP2R4	5.51553	1.82073e-14	5.95823e-15	1.47092e-13	11	99590328	99621986	2412
ENSBTAT00000027541	DNAJC14	2.24266	1.82289e-14	5.95823e-15	1.47193e-13	5	57763740	57770666	3120
ENSBTAT00000000842	VIMP	3.6825	1.82431e-14	5.95823e-15	1.47234e-13	21	5385098	5394275	1277
ENSBTAT00000007840	OARD1	4.36197	1.82912e-14	5.97898e-15	1.47474e-13	23	15000260	15005748	1092
ENSBTAT00000039377	ENSBTAT00000039377	5.1675	1.8283e-14	5.97898e-15	1.47474e-13	16	64843773	64844924	1152
ENSBTAT00000019100	PRPF19	4.15156	1.83346e-14	5.97898e-15	1.47676e-13	29	37804914	37814529	2067
[truncated: 14,105 more rows]
